# Supplementary material for: Extracellular Vesicle Profiling Reveals Novel Autism Signatures in Patient-Derived Forebrain Organoids
Source: Research Square preprint supplement (doi:10.21203/rs.3.rs-6573757/v1), 2025-05-12
Supplement: Supplementary file 1 [file 143d5cc17a274d4389805a99.pdf]

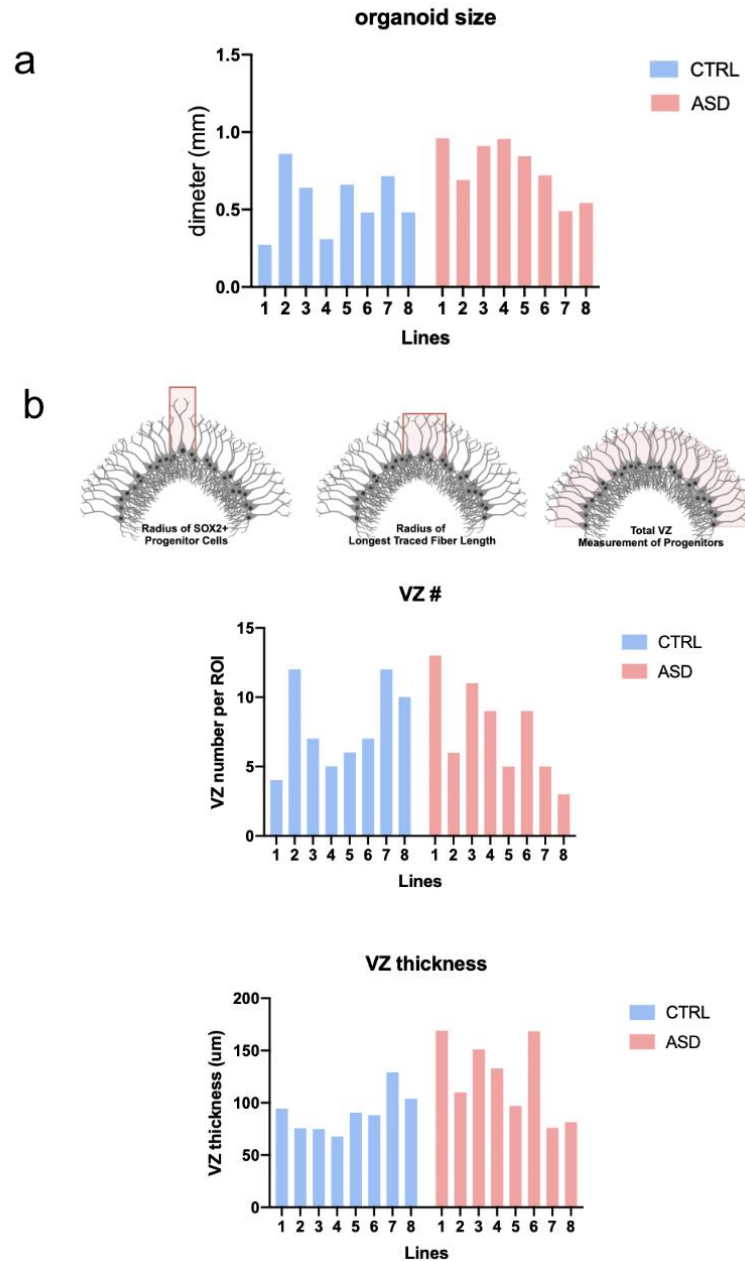

### Supplementary Figure 1. CTRL and ASD organoid size

**a)** Bar graph depicting average organoid size as measured by diameter (mm) in 8 CTRL and 8 ASD lines. Each bar graph represents an average measurement of 6-8 different organoids from the same line. **b)** Top: Schematic of analysis of ventricular zone (VZ) thickness - briefly, ventricular zone, considered as SOX2+ area, thickness was measured by averaging the radius of the longest traced SOX2+ progenitor cells. Bottom: Quantifications depict VZ numbers and VZ thickness across 16 lines used in the study. Each bar graph represents an average measurement of at least 3 organoids (VZ #) or 3 VZ (thickness measurements).

**a Dispersion estimates**

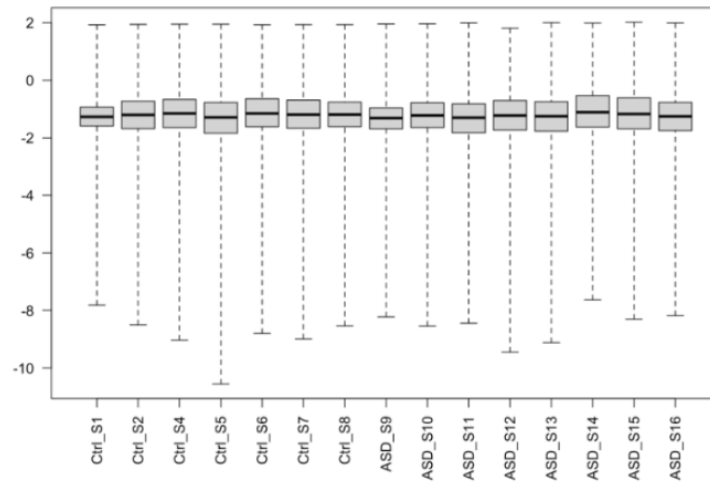

**b RNA Counts by Category: CTRL vs ASD**

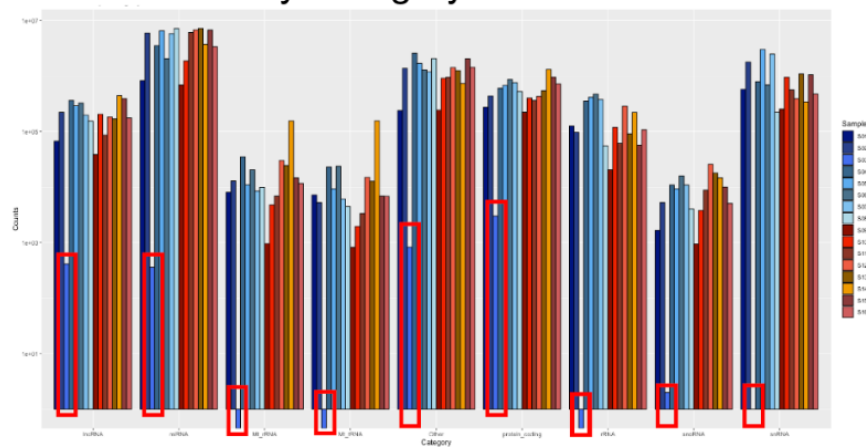

**Supplementary Figure 2. EV cargo RNA variability**

**a)** Box plot depicting consistent dispersion estimates across 16 lines used in the study.

**b)** Bar graph depicting RNA counts by different RNA types across 16 lines. Each bar represents a different line used in the study. CTRL line 3 (marked by red rectangle) was a significant outlier and was excluded from further bioinformatic analysis.

### Top 20 differentially expressed genes by significance

| Gene     | baseMean | log2FoldChange | lfcSE | stat  | p-value | adj p-value | Gene ID         |
|----------|----------|----------------|-------|-------|---------|-------------|-----------------|
| LRRN2    | 43.11    | 6.52           | 1.11  | 5.87  | 0.00    | 0.00        | ENSG00000170362 |
| ATPEV1B2 | 114.66   | 7.27           | 1.34  | 5.41  | 0.00    | 0.00        | ENSG00000147416 |
| EML4     | 54.46    | 5.67           | 1.12  | 5.07  | 0.00    | 0.00        | ENSG00000143924 |
| TTC4     | 22.73    | -7.33          | 1.47  | -4.99 | 0.00    | 0.00        | ENSG00000243725 |
| PES1     | 50.31    | 6.32           | 1.32  | 4.78  | 0.00    | 0.00        | ENSG00000100029 |
| CMTM1    | 20.78    | 6.24           | 1.39  | 4.50  | 0.00    | 0.01        | ENSG00000089505 |
| SLC5A11  | 15.27    | 4.97           | 1.12  | 4.43  | 0.00    | 0.01        | ENSG00000158865 |
| SP140    | 11.56    | 6.40           | 1.46  | 4.39  | 0.00    | 0.01        | ENSG00000079263 |
| DOCK11   | 13.39    | -4.21          | 0.98  | -4.30 | 0.00    | 0.01        | ENSG00000147251 |
| NARS1    | 53.78    | -5.59          | 1.32  | -4.24 | 0.00    | 0.01        | NA              |
| LIPM     | 74.37    | -6.19          | 1.46  | -4.25 | 0.00    | 0.01        | ENSG00000173239 |
| DYRK2    | 15.80    | -6.13          | 1.46  | -4.20 | 0.00    | 0.01        | ENSG00000127334 |
| KIAA2012 | 19.16    | 5.61           | 1.34  | 4.18  | 0.00    | 0.01        | ENSG00000182329 |
| OPRD1    | 41.06    | 4.41           | 1.07  | 4.13  | 0.00    | 0.01        | ENSG00000116329 |
| NELFA    | 48.94    | 5.30           | 1.29  | 4.11  | 0.00    | 0.01        | ENSG00000185049 |
| MATN3    | 23.92    | 5.77           | 1.40  | 4.12  | 0.00    | 0.01        | ENSG00000132031 |
| ANAPC13  | 12.26    | -6.78          | 1.65  | -4.11 | 0.00    | 0.01        | ENSG00000129055 |
| DNAJA4   | 14.75    | 4.76           | 1.16  | 4.10  | 0.00    | 0.01        | ENSG00000140403 |
| PLEKHH1  | 50.55    | -5.86          | 1.44  | -4.07 | 0.00    | 0.01        | ENSG00000054690 |
| PALD1    | 32.50    | -4.88          | 1.21  | -4.04 | 0.00    | 0.01        | ENSG00000107719 |

### Top 20 differentially expressed miRNAs by significance

| microRNA  | baseMean | log2FoldChange | lfcSE | stat  | p-value | adj p-value | Gene ID         |
|-----------|----------|----------------|-------|-------|---------|-------------|-----------------|
| MIR8724-4 | 17.67    | -7.42          | 1.65  | -4.51 | 0.00    | 0.01        | ENSG00000275692 |
| MIR8724-3 | 17.45    | -7.16          | 1.66  | -4.31 | 0.00    | 0.01        | ENSG00000277379 |
| MIR4676   | 19.34    | -7.85          | 1.88  | -4.17 | 0.00    | 0.01        | ENSG00000266719 |
| MIR8724-2 | 17.18    | -6.94          | 1.70  | -4.09 | 0.00    | 0.01        | ENSG00000274060 |
| MIR8724-1 | 16.92    | -6.75          | 1.84  | -3.68 | 0.00    | 0.03        | ENSG00000275950 |
| MIR4440   | 27.03    | -6.07          | 1.68  | -3.61 | 0.00    | 0.03        | ENSG00000266109 |
| MIR508    | 15.50    | -6.36          | 1.77  | -3.60 | 0.00    | 0.03        | ENSG00000207589 |
| MIR370    | 6.07     | -6.19          | 1.74  | -3.55 | 0.00    | 0.03        | ENSG00000199005 |
| MIR2116   | 4.68     | -5.81          | 1.71  | -3.40 | 0.00    | 0.04        | ENSG00000263030 |
| MIR4296   | 102.09   | -2.94          | 0.95  | -3.10 | 0.00    | 0.07        | ENSG00000263762 |
| MIR548Q   | 18.67    | -5.50          | 1.77  | -3.10 | 0.00    | 0.07        | ENSG00000221331 |
| MIR1263   | 90.31    | 7.70           | 2.84  | 2.71  | 0.01    | 0.13        | ENSG00000221251 |
| MIR5699   | 15.76    | -2.46          | 0.96  | -2.56 | 0.01    | 0.16        | ENSG00000263511 |
| MIR4677   | 4.26     | -4.24          | 1.66  | -2.55 | 0.01    | 0.16        | ENSG00000265201 |
| MIR548J   | 5.01     | 4.53           | 1.82  | 2.49  | 0.01    | 0.18        | ENSG00000221760 |
| MIR3943   | 24.56    | 3.68           | 1.50  | 2.46  | 0.01    | 0.19        | ENSG00000264069 |
| MIR4443   | 3.88     | -3.03          | 1.24  | -2.45 | 0.01    | 0.19        | ENSG00000265483 |
| MIR489    | 54.47    | 3.39           | 1.45  | 2.34  | 0.02    | 0.21        | ENSG00000207656 |
| MIR5587   | 8.09     | 3.78           | 1.69  | 2.24  | 0.02    | 0.24        | ENSG00000266124 |
| MIR3180-4 | 25.37    | 2.51           | 1.12  | 2.24  | 0.03    | 0.24        | ENSG00000257391 |

### Supplementary Figure 3. Top 20 differentially regulated coding and miRNAs in ASD EVs compared to CTRL EVs

Top: Table depicting top 20 differentially expressed coding genes (ASD vs CTRL), ordered by their significance ( $p < 0.05$ ). Bottom: Table depicting top 20 differentially expressed miRNAs (ASD vs CTRL), ordered by their significance ( $p < 0.05$ ).

**Supplementary Table. Purchase source and clinical notes of CTRL\* and ASD iPSC lines used in the study\*\*.**

| ID        | Source  | Information                                                                                                                                                                                                     |
|-----------|---------|-----------------------------------------------------------------------------------------------------------------------------------------------------------------------------------------------------------------|
| GM23279   | Coriell | <b>CTRL</b> , female, Hispanic, sample collected at age 29                                                                                                                                                      |
| MH0159019 | NIMH    | <b>CTRL</b> , female, White, sample collected at age 36                                                                                                                                                         |
| MH0159020 | NIMH    | <b>CTRL</b> , male, White, sample collected at age 58                                                                                                                                                           |
| MH0159021 | NIMH    | <b>CTRL</b> , male, Hispanic, sample collected at age 32                                                                                                                                                        |
| MH0174677 | NIMH    | <b>CTRL</b> , male, White, male, white, sample collected at age 9                                                                                                                                               |
| MH0174679 | NIMH    | <b>CTRL</b> , male, White, male, white, sample collected at age 17                                                                                                                                              |
| MH0174681 | NIMH    | <b>CTRL</b> , male, White, male, white, sample collected at age 8                                                                                                                                               |
| MH0174686 | NIMH    | <b>CTRL</b> , male, White, sample collected at age 17                                                                                                                                                           |
| CW20008   | CIRM    | <b>ASD</b> ; male, Asian, sample collected at age 5, low IQ (68), communication and social deficits (ADOS score 16) as well as stereotyped behaviors and restricted interests (ADOS score 5)                    |
| CW20142   | CIRM    | <b>ASD</b> ; male, White, sample collected at age 15, low IQ (40), poor eye contact, communication and social deficits (ADOS score 18) as well as stereotyped behaviors and restricted interests (ADOS score 5) |
| CW60115   | CIRM    | <b>ASD</b> ; male, White, sample collected at age 4, poor eye contact, social deficits,                                                                                                                         |

|           |      |                                                                                                                                                                                                     |
|-----------|------|-----------------------------------------------------------------------------------------------------------------------------------------------------------------------------------------------------|
|           |      | stereotyped behaviors and restricted interests (ADOS score 3)                                                                                                                                       |
| CW20083   | CIRM | <b>ASD</b> ; male, White, sample collected at age 22, poor eye contact, severe communication and social deficits (ADOS score 18) repetitive behavior (ADOS score 8)                                 |
| MH0148698 | NIMH | <b>ASD</b> ; male, White, low IQ, severely affected (Mariani et al., 2015, Allen et al., 2022)                                                                                                      |
| MH0148713 | NIMH | <b>ASD</b> ; male, White, low IQ, severely affected (Mariani et al., 2015, Allen et al., 2022)                                                                                                      |
| CW20026   | CIRM | <b>ASD</b> ; male, White, sample collected at age 10, low IQ (52), communication and social deficits (ADOS score 19) as well as stereotyped behaviors and restricted interests (ADOS score 3)       |
| CW20044   | CIRM | <b>ASD</b> ; male, White, sample collected at age 10, low IQ (40), spinning, severe communication deficits (ADOS score 16) as well as stereotyped behaviors and restricted interests (ADOS score 7) |

\* All controls had no history or reported family history of ASD.

\*\* ADOS stands for Autism Diagnostic Observation Schedule. ADOS testing is a standardized assessment tool designed to evaluate and observe social communication, interaction, and behavior in individuals suspected of having ASD. It is considered the “gold standard” for assessment.
