# Supplementary material for: Extracellular Vesicle Profiling Reveals Novel Autism Signatures in Patient-Derived Forebrain Organoids
Source: Research Square preprint supplement (doi:10.21203/rs.3.rs-6573757/v1), 2025-05-12
Supplement: Supplementary file 2 [file 095d983f65eea6198d9e5a9a.xlsx]

## Sheet: S3
Clustered heatmap t-test analysis of 362 significant proteins based, p-value <0.05. Z-score normalised
Protein.Group	First.Protein.Group	Genes	First.Genes	First.Protein.Description	Ctrl_S1	Ctrl_S2	Ctrl_S3	Ctrl_S4	Ctrl_S5	Ctrl_S6	Ctrl_S7	Ctrl_S8	ASD_S9	ASD_S10	ASD_S11	ASD_S12	ASD_S13	ASD_S14	ASD_S15	ASD_S16	Cluster	GOBP name	GOMF name	GOCC name	KEGG name	Student's T-test p-value ASD_Control	Student's T-test Difference ASD_Control	SFARI	Exocarter
A0A0G2JEQ1;B1AZQ9;B1AZR0;E9Q1L2;E9QA66;Q6PFE1;Q8BLJ6	A0A0G2JEQ1	Klhl4;Klhl5	Klhl4	Kelch-like 5 (Fragment)	-1.12446	-0.626564	-0.136709	-1.763	-0.0776356	1.28295	-0.310765	-1.1376	0.877662	1.85825	-0.277342	0.199886	1.52544	-0.633703	0.0207735	0.32282	Cluster -359					0.0471934	1.45996
P97372	P97372	Psme2	Psme2	Proteasome activator complex subunit 2	-0.230224	-0.894072	0.331252	-0.96186	-0.297095	-0.425219	-0.436975	-1.51707	0.574217	1.946	-0.0247074	0.252394	2.37444	-0.637513	0.222629	-0.276195	Cluster -359	antigen processing and presentation;antigen processing and presentation of exogenous antigen;biological regulation;immune system process;regulation of biological process;regulation of catabolic process;regulation of cell cycle;regulation of cell cycle G1/S phase transition;regulation of cell cycle phase transition;regulation of cell cycle process;regulation of cellular process;regulation of G1/S …	binding;identical protein binding;protein binding	cellular anatomical entity;cytoplasm;nucleoplasm;proteasome activator complex;protein-containing complex	Antigen processing and presentation;Proteasome	0.0205838	1.38301
P01325	P01325	Ins1	Ins1	Insulin-1	-0.0433007	-0.531087	-0.988602	-0.621747	-1.11967	0.632875	-0.358374	-1.36466	1.35684	1.9906	0.759738	-0.14214	1.11311	-1.3157	0.0548352	0.577288	Cluster -359	acute inflammatory response;acute-phase response;alpha-beta T cell activation;biological regulation;blood vessel diameter maintenance;carbohydrate homeostasis;carbohydrate metabolic process;carbohydrate transmembrane transport;carbohydrate transport;cell activation;cell projection organization;cell surface receptor signaling pathway;cellular component organization;cellular component organization …	binding;enzyme activator activity;enzyme binding;enzyme regulator activity;hormone activity;identical protein binding;insulin receptor binding;insulin-like growth factor receptor binding;kinase activator activity;kinase regulator activity;molecular function activator activity;molecular function regulator activity;protease binding;protein binding;protein kinase activator activity;protein kinase re…	cellular anatomical entity;collagen-containing extracellular matrix;cytoplasmic vesicle lumen;cytosol;endoplasmic reticulum lumen;external encapsulating structure;extracellular matrix;extracellular region;extracellular space;intracellular organelle lumen;membrane-enclosed lumen;organelle lumen;secretory granule lumen;vesicle lumen	Aldosterone-regulated sodium reabsorption;Insulin signaling pathway;Maturity onset diabetes of the young;mTOR signaling pathway;Oocyte meiosis;Progesterone-mediated oocyte maturation;Prostate cancer;Regulation of actin cytoskeleton;Regulation of autophagy;Type I diabetes mellitus;Type II diabetes mellitus	0.0219033	1.30774
Q6A0A9	Q6A0A9	FAM120A	FAM120A	Constitutive coactivator of PPAR-gamma-like protein 1	-0.776075	-0.180643	-0.15547	-0.399341	-1.08998	-0.261849	0.160378	-1.42724	0.540226	1.35898	0.919779	0.481876	1.69471	-2.00572	0.346579	0.793793	Cluster -359		binding;nucleic acid binding;organic cyclic compound binding;RNA binding	cellular anatomical entity;cytosol;intracellular membrane-bounded organelle;intracellular organelle;membrane;membrane-bounded organelle;nucleus;organelle;plasma membrane		0.0334299	1.13089
Q8BVG4	Q8BVG4	Dpp9	Dpp9	Dipeptidyl peptidase 9	-0.221839	-0.529257	-0.805619	-0.300877	-0.379896	-0.713728	0.923186	-1.84068	0.836602	0.865728	1.01478	0.155504	2.30828	-1.05636	-0.296568	0.0407394	Cluster -359	biological regulation;cell death;cellular process;macromolecule metabolic process;metabolic process;negative regulation of biological process;negative regulation of cellular process;negative regulation of programmed cell death;nitrogen compound metabolic process;organic substance metabolic process;organonitrogen compound metabolic process;primary metabolic process;programmed cell death;protein me…	aminopeptidase activity;binding;catalytic activity;catalytic activity, acting on a protein;dipeptidyl-peptidase activity;exopeptidase activity;hydrolase activity;identical protein binding;peptidase activity;protein binding;serine hydrolase activity;serine-type peptidase activity	cell leading edge;cellular anatomical entity;cytosol;microtubule;polymeric cytoskeletal fiber;supramolecular complex;supramolecular fiber;supramolecular polymer		0.0488688	1.12186
Q8VBW6	Q8VBW6	Nae1	Nae1	NEDD8-activating enzyme E1 regulatory subunit	-1.36977	-0.443675	0.0671102	-0.806044	-0.973316	-0.45142	1.0067	-0.89693	0.214971	2.77138	0.26201	-0.311316	0.762864	-0.549731	0.725979	-0.00881088	Cluster -359	apoptotic process;biological regulation;catabolic process;cell cycle checkpoint signaling;cell cycle process;cell death;cellular process;cellular response to stimulus;cellular response to stress;DNA damage response;DNA integrity checkpoint signaling;DNA replication checkpoint signaling;intracellular signal transduction;macromolecule catabolic process;macromolecule metabolic process;macromolecule …	ATP-dependent activity;binding;catalytic activity;catalytic activity, acting on a protein;enzyme binding;ligase activity;ligase activity, forming carbon-sulfur bonds;NEDD8 activating enzyme activity;protein binding;protein dimerization activity;protein heterodimerization activity;ubiquitin activating enzyme activity;ubiquitin protein ligase binding;ubiquitin-like modifier activating enzyme activi…	cellular anatomical entity;cytoplasm;cytoplasmic vesicle;early endosome;endosome;intracellular membrane-bounded organelle;intracellular organelle;intracellular vesicle;membrane;membrane-bounded organelle;nucleus;organelle;plasma membrane;protein-containing complex;vesicle	Alzheimer's disease	0.0489613	1.2044
P97350	P97350	Pkp1	Pkp1	Plakophilin-1	-0.73475	-1.23116	-0.108684	-0.56331	0.460695	-0.242644	-0.731291	-0.714932	0.124664	0.58521	-0.179549	0.339621	0.648436	-1.2838	0.783723	2.84777	Cluster -359	biological regulation;cell adhesion;cell junction assembly;cell junction organization;cell-cell adhesion;cell-cell junction assembly;cell-cell junction organization;cellular component assembly;cellular component organization;cellular component organization or biogenesis;cellular process;cytoskeleton organization;intermediate filament bundle assembly;intermediate filament cytoskeleton organization…	binding;cadherin binding;cell adhesion molecule binding;lamin binding;protein binding	adherens junction;anchoring junction;cell junction;cell-cell junction;cellular anatomical entity;cornified envelope;cytoplasm;desmosome;intracellular membrane-bounded organelle;intracellular organelle;membrane;membrane-bounded organelle;messenger ribonucleoprotein complex;nucleoplasm;nucleus;organelle;plasma membrane;protein-containing complex;ribonucleoprotein complex		0.0490472	1.88801
P80315	P80315	Cct4	Cct4	T-complex protein 1 subunit delta	0.342328	0.611099	0.310109	0.582969	0.479534	0.143046	1.45761	0.398657	-0.631941	-2.36304	-0.931036	0.265345	-1.96155	0.253811	0.806819	0.236239	Cluster -360	binding of sperm to zona pellucida;biological regulation;cell recognition;cell-cell recognition;cellular process;chaperone-mediated protein folding;establishment of localization;localization;macromolecule localization;positive regulation of biological process;positive regulation of biosynthetic process;positive regulation of cellular biosynthetic process;positive regulation of cellular component …	adenyl nucleotide binding;adenyl ribonucleotide binding;anion binding;ATP binding;ATP hydrolysis activity;ATP-dependent activity;ATP-dependent protein folding chaperone;binding;carbohydrate derivative binding;catalytic activity;heterocyclic compound binding;hydrolase activity;hydrolase activity, acting on acid anhydrides;hydrolase activity, acting on acid anhydrides, in phosphorus-containing anhy…	cell body;cell projection;cellular anatomical entity;centrosome;chaperonin-containing T-complex;cilium;cytoplasmic vesicle;cytosol;intracellular membrane-bounded organelle;intracellular organelle;intracellular protein-containing complex;intracellular vesicle;melanosome;membrane-bounded organelle;microtubule;microtubule organizing center;nucleoplasm;organelle;pigment granule;plasma membrane bounde…		0.0245682	-1.66981	CCT4
Q9D2Q8	Q9D2Q8	S100a14	S100a14	Protein S100-A14	-1.38415	-0.864148	-0.671189	-0.355032	1.18611	0.214264	-1.04779	-1.44976	0.875389	0.395586	0.0998107	0.777159	1.02575	-1.00305	0.361913	1.83913	Cluster -359	activation of immune response;activation of innate immune response;apoptotic process;biological process involved in interspecies interaction between organisms;biological regulation;cell death;cell surface pattern recognition receptor signaling pathway;cell surface receptor signaling pathway;cell surface toll-like receptor signaling pathway;cellular process;defense response;defense response to bac…	binding;calcium ion binding;calcium-dependent protein binding;cation binding;chemokine receptor binding;cytokine receptor binding;G protein-coupled receptor binding;ion binding;metal ion binding;protein binding;signaling receptor binding	cellular anatomical entity;extracellular space;perinuclear region of cytoplasm		0.0227581	2.12952
Q9EST1	Q9EST1	Gsdma	Gsdma	Gasdermin-A	-0.161169	-0.271847	-0.467309	-0.55422	0.543715	-0.450273	-1.71666	-1.16297	0.730797	0.264349	1.12245	0.591263	0.0453337	-0.806539	-0.282038	2.57512	Cluster -359	biological process involved in interspecies interaction between organisms;cell death;cellular process;defense response;defense response to bacterium;defense response to other organism;programmed cell death;pyroptosis;response to bacterium;response to biotic stimulus;response to external biotic stimulus;response to external stimulus;response to other organism;response to stimulus;response to stress	anion binding;binding;channel activity;ion binding;lipid binding;modified amino acid binding;passive transmembrane transporter activity;phosphatidylinositol binding;phosphatidylinositol bisphosphate binding;phosphatidylinositol phosphate binding;phosphatidylinositol-4,5-bisphosphate binding;phosphatidylinositol-4-phosphate binding;phosphatidylserine binding;phospholipid binding;transmembrane tran…	cellular anatomical entity;cytoplasm;cytosol;membrane;perinuclear region of cytoplasm;plasma membrane		0.0281564	1.44495
P50446	P50446	Krt6a	Krt6a	Keratin, type II cytoskeletal 6A	-0.143247	-0.195165	0.579822	-1.19861	0.365128	0.109734	-1.25782	-2.4647	1.62473	0.136911	0.187614	0.653153	0.922343	-0.523822	0.156874	1.04705	Cluster -359	anatomical structure morphogenesis;antimicrobial humoral immune response mediated by antimicrobial peptide;antimicrobial humoral response;biological process involved in interspecies interaction between organisms;biological regulation;cell surface receptor signaling pathway;cellular component organization;cellular component organization or biogenesis;cellular process;cytoskeleton organization;defe…	structural constituent of skin epidermis;structural molecule activity	cellular anatomical entity;intermediate filament;keratin filament;polymeric cytoskeletal fiber;supramolecular complex;supramolecular fiber;supramolecular polymer		0.0297934	2.17902
Q61781;Q9Z2K1	Q61781	Krt14;Krt16	Krt14	Keratin, type I cytoskeletal 14	-0.0358252	-1.0248	0.474431	-0.928471	0.188694	-0.733764	-1.13023	-0.675209	1.67939	0.790565	0.438759	-0.590055	0.738154	-1.22253	-0.0950128	2.12591	Cluster -359	cell differentiation;cellular component assembly;cellular component organization;cellular component organization or biogenesis;cellular developmental process;cellular process;cytoskeleton organization;developmental process;epidermal cell differentiation;epithelial cell differentiation;hair cycle;intermediate filament bundle assembly;intermediate filament cytoskeleton organization;intermediate fil…	binding;intermediate filament binding;keratin filament binding;structural molecule activity	basal part of cell;cell periphery;cellular anatomical entity;cornified envelope;cytoplasm;cytoskeleton;intermediate filament;intracellular membrane-bounded organelle;intracellular non-membrane-bounded organelle;intracellular organelle;keratin filament;membrane;membrane-bounded organelle;non-membrane-bounded organelle;nucleus;organelle;plasma membrane;polymeric cytoskeletal fiber;supramolecular co…		0.0491082	1.82423
Q6IFX2;Q9QWL7	Q6IFX2	Krt17;Krt42	Krt17	Keratin, type I cytoskeletal 42	-0.408319	-0.514678	0.626035	-0.939981	0.294912	-0.504924	-1.29791	-1.16192	1.32152	-0.252369	0.739917	0.35693	1.12618	-1.07808	-0.489369	2.18205	Cluster -359	cell differentiation;cellular component organization;cellular component organization or biogenesis;cellular developmental process;cellular process;cytoskeleton organization;developmental process;epithelial cell differentiation;intermediate filament cytoskeleton organization;intermediate filament organization;intermediate filament-based process;organelle organization;supramolecular fiber organizat…	structural molecule activity	cellular anatomical entity;cytoplasm;cytoskeleton;intermediate filament;intracellular non-membrane-bounded organelle;intracellular organelle;keratin filament;non-membrane-bounded organelle;organelle;polymeric cytoskeletal fiber;supramolecular complex;supramolecular fiber;supramolecular polymer		0.046342	2.05555
P07744;P50446;Q3UV17;Q922U2	P07744	Krt4;Krt5;Krt6a;Krt76	Krt4	Keratin, type II cytoskeletal 4	-0.279693	-0.675498	-0.589984	-0.885073	0.0181729	0.40639	-1.96252	-1.64051	1.4641	1.03893	0.587801	0.334247	1.21471	-0.487064	0.433952	1.02204	Cluster -359	biological regulation;cell differentiation;cellular component organization;cellular component organization or biogenesis;cellular developmental process;cellular process;cytoskeleton organization;developmental process;epithelial cell differentiation;intermediate filament cytoskeleton organization;intermediate filament organization;intermediate filament-based process;keratinization;multicellular or…	structural constituent of skin epidermis;structural molecule activity	cell surface;cellular anatomical entity;cytoskeleton;intermediate filament;intermediate filament cytoskeleton;intracellular non-membrane-bounded organelle;intracellular organelle;keratin filament;non-membrane-bounded organelle;organelle;polymeric cytoskeletal fiber;supramolecular complex;supramolecular fiber;supramolecular polymer		0.00151563	2.93867
A1L317	A1L317	Krt24	Krt24	Keratin, type I cytoskeletal 24	-0.0438661	-1.52386	0.103444	-0.669217	0.531584	0.0825164	-1.47561	-1.89478	1.24941	0.980999	0.493948	0.224246	1.1784	-0.613905	0.127277	1.24941	Cluster -359	cell differentiation;cellular component organization;cellular component organization or biogenesis;cellular developmental process;cellular process;cytoskeleton organization;developmental process;epithelial cell differentiation;intermediate filament cytoskeleton organization;intermediate filament organization;intermediate filament-based process;organelle organization;supramolecular fiber organizat…	structural molecule activity	cellular anatomical entity;cytoskeleton;intermediate filament;intracellular non-membrane-bounded organelle;intracellular organelle;non-membrane-bounded organelle;organelle;polymeric cytoskeletal fiber;supramolecular complex;supramolecular fiber;supramolecular polymer		0.00872719	2.28013
Q61781	Q61781	Krt14	Krt14	Keratin, type I cytoskeletal 14	-0.245495	-0.563094	0.229294	-0.637449	0.474071	-0.621648	-1.73524	-1.99343	0.990316	0.244104	0.86889	0.462641	0.969822	-0.601775	0.399397	1.7596	Cluster -359	cell differentiation;cellular component assembly;cellular component organization;cellular component organization or biogenesis;cellular developmental process;cellular process;cytoskeleton organization;developmental process;epidermal cell differentiation;epithelial cell differentiation;hair cycle;intermediate filament bundle assembly;intermediate filament cytoskeleton organization;intermediate fil…	binding;intermediate filament binding;keratin filament binding;structural molecule activity	basal part of cell;cell periphery;cellular anatomical entity;cornified envelope;cytoplasm;cytoskeleton;intermediate filament;intracellular membrane-bounded organelle;intracellular non-membrane-bounded organelle;intracellular organelle;keratin filament;membrane;membrane-bounded organelle;non-membrane-bounded organelle;nucleus;organelle;plasma membrane;polymeric cytoskeletal fiber;supramolecular co…		0.00563988	2.7581
Q3TTY5	Q3TTY5	Krt2	Krt2	Keratin, type II cytoskeletal 2 epidermal	0.0401792	-1.12054	0.505774	-1.02624	0.499185	0.472272	-2.24527	-1.45016	1.09285	0.717832	0.817146	0.568843	0.812686	-0.836996	0.362433	0.790005	Cluster -359	ameboidal-type cell migration;anatomical structure development;biological regulation;cell activation;cell development;cell migration;cell motility;cell population proliferation;cellular component organization;cellular component organization or biogenesis;cellular developmental process;cellular process;cytoskeleton organization;developmental process;epidermis development;epithelial cell developmen…	binding;cytoskeletal protein binding;protein binding;structural constituent of skin epidermis;structural molecule activity	cellular anatomical entity;cornified envelope;cytoplasm;intermediate filament;keratin filament;membrane;plasma membrane;polymeric cytoskeletal fiber;supramolecular complex;supramolecular fiber;supramolecular polymer		0.0245905	1.9484
Q8VED5	Q8VED5	Krt79	Krt79	Keratin, type II cytoskeletal 79	-0.115588	-0.992692	0.183482	-0.932587	0.311513	0.348543	-2.18693	-1.39542	1.06331	0.736125	0.808346	0.621531	1.06036	-1.01245	0.469178	1.03327	Cluster -359	cellular component organization;cellular component organization or biogenesis;cellular process;cytoskeleton organization;intermediate filament cytoskeleton organization;intermediate filament organization;intermediate filament-based process;keratinization;multicellular organismal process;organelle organization;supramolecular fiber organization	binding;enzyme binding;protein binding;structural constituent of skin epidermis;structural molecule activity	cellular anatomical entity;intermediate filament;keratin filament;polymeric cytoskeletal fiber;supramolecular complex;supramolecular fiber;supramolecular polymer		0.0108857	2.16568
P07744;P50446;Q3TTY5;Q3UV17;Q6NXH9;Q922U2	P07744	Krt2;Krt4;Krt5;Krt6a;Krt73;Krt76	Krt2	Keratin, type II cytoskeletal 4	0.0342226	-1.04417	0.567804	-0.96503	0.396557	0.366939	-2.09566	-1.55378	1.06436	0.624784	0.825796	0.550205	0.61744	-0.978222	0.320669	1.26809	Cluster -359	biological regulation;cell differentiation;cellular component organization;cellular component organization or biogenesis;cellular developmental process;cellular process;cytoskeleton organization;developmental process;epithelial cell differentiation;intermediate filament cytoskeleton organization;intermediate filament organization;intermediate filament-based process;keratinization;multicellular or…	structural constituent of skin epidermis;structural molecule activity	cell surface;cellular anatomical entity;cytoskeleton;intermediate filament;intermediate filament cytoskeleton;intracellular non-membrane-bounded organelle;intracellular organelle;keratin filament;non-membrane-bounded organelle;organelle;polymeric cytoskeletal fiber;supramolecular complex;supramolecular fiber;supramolecular polymer		0.0258907	2.13414
P02535	P02535	Krt10	Krt10	Keratin, type I cytoskeletal 10	-0.0485269	-1.20458	0.392523	-0.951066	0.460194	0.489792	-2.15801	-1.31657	1.08627	0.728285	0.702894	0.526938	0.854581	-1.00565	0.284871	1.15805	Cluster -359	anatomical structure development;biological regulation;cell development;cell differentiation;cellular component assembly;cellular component organization;cellular component organization or biogenesis;cellular developmental process;cellular process;cellular response to calcium ion;cellular response to chemical stimulus;cellular response to inorganic substance;cellular response to metal ion;cellular…	binding;cytoskeletal protein binding;protein binding;protein dimerization activity;protein heterodimerization activity;structural constituent of skin epidermis;structural molecule activity	cell surface;cellular anatomical entity;cornified envelope;cytoplasm;cytoskeleton;extracellular space;intermediate filament;intracellular non-membrane-bounded organelle;intracellular organelle;keratin filament;membrane;non-membrane-bounded organelle;organelle;plasma membrane;polymeric cytoskeletal fiber;supramolecular complex;supramolecular fiber;supramolecular polymer		0.0241328	1.92706
P02535;P08730	P02535	Krt10;Krt13	Krt10	Keratin, type I cytoskeletal 10	0.0428111	-1.10374	0.258442	-1.18326	0.531908	0.282893	-1.9672	-1.38726	1.21253	0.587217	0.734804	0.662148	0.825927	-1.05388	0.355324	1.20134	Cluster -359	anatomical structure development;biological regulation;cell development;cell differentiation;cellular component assembly;cellular component organization;cellular component organization or biogenesis;cellular developmental process;cellular process;cellular response to calcium ion;cellular response to chemical stimulus;cellular response to inorganic substance;cellular response to metal ion;cellular…	binding;cytoskeletal protein binding;protein binding;protein dimerization activity;protein heterodimerization activity;structural constituent of skin epidermis;structural molecule activity	cell surface;cellular anatomical entity;cornified envelope;cytoplasm;cytoskeleton;extracellular space;intermediate filament;intracellular non-membrane-bounded organelle;intracellular organelle;keratin filament;membrane;non-membrane-bounded organelle;organelle;plasma membrane;polymeric cytoskeletal fiber;supramolecular complex;supramolecular fiber;supramolecular polymer		0.0174793	1.98431
P04104;P11679;P50446;Q3TTY5;Q6IFZ6;Q8VED5;Q922U2	P04104	Krt1;Krt2;Krt5;Krt6a;Krt77;Krt79;Krt8	Krt1	Keratin, type II cytoskeletal 1	-0.421298	-0.72626	0.363368	-0.236001	0.413205	0.224567	-2.10479	-1.40092	0.734385	0.446793	0.67469	0.174575	0.872104	-1.19999	0.176292	2.00928	Cluster -359	activation of immune response;anatomical structure development;biological process involved in interspecies interaction between organisms;biological regulation;cellular component assembly;cellular component organization;cellular component organization or biogenesis;cellular process;complement activation;complement activation, lectin pathway;cytoskeleton organization;defense response;defense respon…	binding;carbohydrate binding;protein binding;protein dimerization activity;protein heterodimerization activity;structural constituent of skin epidermis;structural molecule activity	cellular anatomical entity;collagen-containing extracellular matrix;cornified envelope;cytoplasm;external encapsulating structure;extracellular matrix;intermediate filament;keratin filament;membrane;plasma membrane;polymeric cytoskeletal fiber;supramolecular complex;supramolecular fiber;supramolecular polymer		0.047568	1.77974
P04104;Q6IFZ6;Q6NXH9	P04104	Krt1;Krt73;Krt77	Krt1	Keratin, type II cytoskeletal 1	-0.574491	-1.02766	0.104585	-1.12726	0.203542	0.340157	-1.76285	-1.22389	0.847875	0.545297	0.88271	0.492911	0.899521	-0.834864	0.242925	1.99149	Cluster -359	activation of immune response;anatomical structure development;biological process involved in interspecies interaction between organisms;biological regulation;cellular component assembly;cellular component organization;cellular component organization or biogenesis;cellular process;complement activation;complement activation, lectin pathway;cytoskeleton organization;defense response;defense respon…	binding;carbohydrate binding;protein binding;protein dimerization activity;protein heterodimerization activity;structural constituent of skin epidermis;structural molecule activity	cellular anatomical entity;collagen-containing extracellular matrix;cornified envelope;cytoplasm;external encapsulating structure;extracellular matrix;intermediate filament;keratin filament;membrane;plasma membrane;polymeric cytoskeletal fiber;supramolecular complex;supramolecular fiber;supramolecular polymer		0.00596562	2.5191
E9Q0F0	E9Q0F0	Krt78	Krt78	Keratin 78	-0.2066	-0.858436	0.43171	-0.786606	0.285591	0.485555	-1.70225	-1.56348	0.730353	0.736551	0.742699	0.305164	0.997906	-1.34823	-0.0442682	1.79434	Cluster -359	cellular component organization;cellular component organization or biogenesis;cellular process;cytoskeleton organization;intermediate filament cytoskeleton organization;intermediate filament organization;intermediate filament-based process;keratinization;multicellular organismal process;organelle organization;supramolecular fiber organization	structural constituent of skin epidermis;structural molecule activity	cellular anatomical entity;cornified envelope;intermediate filament;keratin filament;membrane;plasma membrane;polymeric cytoskeletal fiber;supramolecular complex;supramolecular fiber;supramolecular polymer		0.0458411	1.90203
P05784;P08730;Q9QWL7	P05784	Krt13;Krt17;Krt18	Krt13	Keratin, type I cytoskeletal 18	-0.291189	-0.903127	0.221261	-0.698098	0.23988	0.420411	-2.00791	-1.34887	0.971481	0.521263	0.707946	0.46014	0.80796	-1.17796	0.216102	1.86072	Cluster -359	apoptotic process;apoptotic signaling pathway;biological regulation;cell death;cell surface receptor signaling pathway;cellular component organization;cellular component organization or biogenesis;cellular localization;cellular macromolecule localization;cellular process;cytokine-mediated signaling pathway;cytoskeleton organization;epithelial cell apoptotic process;establishment of localization;e…	binding;protein binding;scaffold protein binding;structural molecule activity	cell periphery;cellular anatomical entity;centriolar satellite;cytoplasm;cytoskeleton;cytosol;external side of plasma membrane;extracellular space;intermediate filament;intracellular non-membrane-bounded organelle;intracellular organelle;keratin filament;microtubule organizing center;non-membrane-bounded organelle;nuclear matrix;nucleolus;organelle;perinuclear region of cytoplasm;polymeric cytosk…		0.0229115	2.08914
P04104	P04104	Krt1	Krt1	Keratin, type II cytoskeletal 1	-0.349442	-0.798763	0.0570784	-0.880065	0.290239	0.240368	-1.77765	-1.25101	0.930158	0.522471	0.585213	0.416302	0.903518	-1.15604	0.0808945	2.18672	Cluster -359	activation of immune response;anatomical structure development;biological process involved in interspecies interaction between organisms;biological regulation;cellular component assembly;cellular component organization;cellular component organization or biogenesis;cellular process;complement activation;complement activation, lectin pathway;cytoskeleton organization;defense response;defense respon…	binding;carbohydrate binding;protein binding;protein dimerization activity;protein heterodimerization activity;structural constituent of skin epidermis;structural molecule activity	cellular anatomical entity;collagen-containing extracellular matrix;cornified envelope;cytoplasm;external encapsulating structure;extracellular matrix;intermediate filament;keratin filament;membrane;plasma membrane;polymeric cytoskeletal fiber;supramolecular complex;supramolecular fiber;supramolecular polymer		0.019284	2.12948
P50446;Q922U2	P50446	Krt5;Krt6a	Krt5	Keratin, type II cytoskeletal 6A	-0.270799	-0.809042	-0.143315	-0.854787	0.210513	0.38423	-1.7595	-1.37841	0.930385	0.696018	0.773443	0.428252	1.06018	-1.23716	0.0887729	1.88122	Cluster -359	anatomical structure morphogenesis;antimicrobial humoral immune response mediated by antimicrobial peptide;antimicrobial humoral response;biological process involved in interspecies interaction between organisms;biological regulation;cell surface receptor signaling pathway;cellular component organization;cellular component organization or biogenesis;cellular process;cytoskeleton organization;defe…	structural constituent of skin epidermis;structural molecule activity	cellular anatomical entity;intermediate filament;keratin filament;polymeric cytoskeletal fiber;supramolecular complex;supramolecular fiber;supramolecular polymer		0.014709	2.11043
Q3UV17	Q3UV17	Krt76	Krt76	Keratin, type II cytoskeletal 2 oral	-0.257234	-0.870926	0.407765	-1.07095	0.130646	0.407765	-1.88699	-1.40931	1.08145	0.535401	0.64561	0.556588	0.85848	-1.17669	0.420238	1.62816	Cluster -359	anatomical structure development;animal organ development;cellular component organization;cellular component organization or biogenesis;cellular process;cytoskeleton organization;developmental process;epidermis development;gland development;intermediate filament cytoskeleton organization;intermediate filament organization;intermediate filament-based process;keratinization;multicellular organismal…	structural constituent of skin epidermis;structural molecule activity	cellular anatomical entity;intermediate filament;keratin filament;polymeric cytoskeletal fiber;supramolecular complex;supramolecular fiber;supramolecular polymer		0.0167545	2.02914
Q61781;Q9QWL7	Q61781	Krt14;Krt17	Krt14	Keratin, type I cytoskeletal 14	-0.240659	-0.708428	0.695414	-0.991414	0.12219	0.157833	-2.05297	-1.16374	1.20178	0.275398	0.480608	0.294881	0.88301	-1.06839	0.229566	1.88493	Cluster -359	cell differentiation;cellular component assembly;cellular component organization;cellular component organization or biogenesis;cellular developmental process;cellular process;cytoskeleton organization;developmental process;epidermal cell differentiation;epithelial cell differentiation;hair cycle;intermediate filament bundle assembly;intermediate filament cytoskeleton organization;intermediate fil…	binding;intermediate filament binding;keratin filament binding;structural molecule activity	basal part of cell;cell periphery;cellular anatomical entity;cornified envelope;cytoplasm;cytoskeleton;intermediate filament;intracellular membrane-bounded organelle;intracellular non-membrane-bounded organelle;intracellular organelle;keratin filament;membrane;membrane-bounded organelle;non-membrane-bounded organelle;nucleus;organelle;plasma membrane;polymeric cytoskeletal fiber;supramolecular co…		0.0308839	2.06459
Q6IFX2	Q6IFX2	Krt42	Krt42	Keratin, type I cytoskeletal 42	-0.18201	-0.652871	0.228302	-0.922856	0.234272	0.022189	-2.21478	-1.19332	1.19428	0.471199	0.648525	0.424482	0.905002	-0.969454	0.219256	1.78778	Cluster -359	cell differentiation;cellular component organization;cellular component organization or biogenesis;cellular developmental process;cellular process;cytoskeleton organization;developmental process;epithelial cell differentiation;intermediate filament cytoskeleton organization;intermediate filament organization;intermediate filament-based process;organelle organization;supramolecular fiber organizat…	structural molecule activity	cellular anatomical entity;cytoplasm;cytoskeleton;intermediate filament;intracellular non-membrane-bounded organelle;intracellular organelle;keratin filament;non-membrane-bounded organelle;organelle;polymeric cytoskeletal fiber;supramolecular complex;supramolecular fiber;supramolecular polymer		0.0131567	2.29016
Q9Z2K1	Q9Z2K1	Krt16	Krt16	Keratin, type I cytoskeletal 16	-0.261693	-0.741707	0.166784	-0.853023	0.224072	0.164296	-1.92972	-1.50882	1.25868	0.336445	0.602592	0.465511	0.959145	-0.947401	0.219468	1.84537	Cluster -359	ameboidal-type cell migration;anatomical structure development;anatomical structure morphogenesis;biological process involved in interspecies interaction between organisms;biological regulation;cell differentiation;cell migration;cell motility;cellular component organization;cellular component organization or biogenesis;cellular developmental process;cellular process;cytoskeleton organization;def…	structural constituent of cytoskeleton;structural molecule activity	cellular anatomical entity;cornified envelope;cytoskeleton;intermediate filament;intracellular non-membrane-bounded organelle;intracellular organelle;keratin filament;membrane;non-membrane-bounded organelle;organelle;plasma membrane;polymeric cytoskeletal fiber;supramolecular complex;supramolecular fiber;supramolecular polymer		0.0117634	2.37274
Q922U2	Q922U2	Krt5	Krt5	Keratin, type II cytoskeletal 5	-0.189068	-0.684458	0.25043	-0.855273	0.293636	0.151442	-2.04243	-1.34114	0.88917	0.329485	0.692664	0.417403	0.944367	-1.16516	0.394854	1.91408	Cluster -359	biological regulation;cellular component assembly;cellular component organization;cellular component organization or biogenesis;cellular process;cytoskeleton organization;intermediate filament cytoskeleton organization;intermediate filament organization;intermediate filament polymerization;intermediate filament polymerization or depolymerization;intermediate filament-based process;keratinization;…	binding;protein binding;scaffold protein binding;structural constituent of skin epidermis;structural molecule activity	cellular anatomical entity;cornified envelope;cytoplasm;intermediate filament;keratin filament;membrane;plasma membrane;polymeric cytoskeletal fiber;supramolecular complex;supramolecular fiber;supramolecular polymer		0.0210942	2.14322
A0A0N4SUN5	A0A0N4SUN5	Nrip2	Nrip2	Nuclear receptor interacting protein 2 (Fragment)	0.254984	-1.44493	0.268994	-0.216807	-0.612391	0.676005	-2.02959	-1.17977	0.922125	1.3499	1.57697	-0.346063	0.170448	-0.150462	-0.23801	0.998598	Cluster -359	macromolecule metabolic process;metabolic process;nitrogen compound metabolic process;organic substance metabolic process;organonitrogen compound metabolic process;primary metabolic process;protein metabolic process;proteolysis	aspartic-type endopeptidase activity;aspartic-type peptidase activity;catalytic activity;catalytic activity, acting on a protein;endopeptidase activity;hydrolase activity;peptidase activity			0.0262956	1.51845
B0V2N1	B0V2N1	Ptprs	Ptprs	Receptor-type tyrosine-protein phosphatase S	-0.0849861	-1.23174	-0.739077	-0.608084	-0.133494	0.710976	-2.00749	-0.365011	1.50833	1.53484	0.188562	0.0323586	1.50096	-0.046561	-0.806878	0.54729	Cluster -359	anatomical structure development;biological regulation;cell adhesion;cell communication;cell development;cell junction organization;cell-cell adhesion;cell-cell adhesion via plasma-membrane adhesion molecules;cell-cell signaling;cellular component assembly;cellular component organization;cellular component organization or biogenesis;cellular developmental process;cellular metabolic process;cellul…	binding;carbohydrate derivative binding;catalytic activity;catalytic activity, acting on a protein;chondroitin sulfate binding;glycosaminoglycan binding;heparan sulfate proteoglycan binding;heparin binding;hydrolase activity;hydrolase activity, acting on ester bonds;phosphatase activity;phosphoprotein phosphatase activity;phosphoric ester hydrolase activity;protein binding;protein tyrosine phosph…	axon;bounding membrane of organelle;cell junction;cell projection;cellular anatomical entity;cytoplasmic vesicle membrane;cytosol;exocytic vesicle membrane;glutamatergic synapse;growth cone;membrane;neuron projection;organelle membrane;perikaryon;plasma membrane;plasma membrane bounded cell projection;plasma membrane region;postsynaptic density membrane;postsynaptic specialization membrane;presyn…		0.0196313	1.87711
P60060	P60060	Sec61g	Sec61g	Protein transport protein Sec61 subunit gamma	-0.687523	-0.0421715	-0.967148	-0.886974	-1.01311	-0.186275	-1.36449	-0.195878	1.80189	1.42307	0.268261	0.710878	1.75141	-0.228936	-0.82384	0.440848	Cluster -359	cellular localization;cellular macromolecule localization;cellular process;establishment of localization;establishment of localization in cell;establishment of protein localization;intracellular protein transmembrane transport;intracellular protein transport;intracellular transport;localization;macromolecule localization;nitrogen compound transport;organic substance transport;post-translational p…	binding;macromolecule transmembrane transporter activity;protein transmembrane transporter activity;protein transporter activity;protein-containing complex binding;ribonucleoprotein complex binding;ribosome binding;transmembrane transporter activity;transporter activity	cellular anatomical entity;endoplasmic reticulum protein-containing complex;membrane;membrane protein complex;protein-containing complex;Ssh1 translocon complex;translocon complex	Phagosome;Protein export;Protein processing in endoplasmic reticulum;Vibrio cholerae infection	0.00310436	1.24512
Q9WTR5	Q9WTR5	Cdh13	Cdh13	Cadherin-13	1.42829	-0.400527	-0.533416	-1.54786	-0.952865	-0.812823	-1.02259	-0.0403891	1.14798	0.916527	-0.223542	0.0507164	0.347217	2.19678	-0.587542	0.0340287	Cluster -359	adherens junction organization;ameboidal-type cell migration;anatomical structure formation involved in morphogenesis;anatomical structure morphogenesis;angiogenesis;biological regulation;calcium-dependent cell-cell adhesion via plasma membrane cell adhesion molecules;cell adhesion;cell junction assembly;cell junction organization;cell migration;cell morphogenesis;cell motility;cell population pr…	adiponectin binding;binding;cadherin binding;calcium ion binding;cation binding;cell adhesion molecule binding;hormone binding;identical protein binding;ion binding;lipoprotein particle binding;low-density lipoprotein particle binding;metal ion binding;protein binding;protein-containing complex binding;protein-lipid complex binding	adherens junction;anchoring junction;catenin complex;caveola;cell junction;cell projection;cell-cell junction;cellular anatomical entity;cytoplasm;external side of plasma membrane;extracellular space;GABA-ergic synapse;membrane;membrane microdomain;membrane protein complex;membrane raft;neuron projection;perinuclear region of cytoplasm;plasma membrane;plasma membrane bounded cell projection;plasm…		0.0479641	1.48058	CDH13
Q01339	Q01339	Apoh	Apoh	Beta-2-glycoprotein 1	-0.792026	-1.303	-0.0734558	-0.374844	-0.275528	0.640526	-1.60609	-0.680445	1.39733	1.45452	0.763352	0.0102581	1.65217	-1.01805	-0.427521	0.632802	Cluster -359	acylglycerol metabolic process;acylglycerol transport;anatomical structure development;animal organ development;animal organ regeneration;biological regulation;blood coagulation, intrinsic pathway;cellular lipid metabolic process;cellular metabolic process;cellular process;developmental process;establishment of localization;glycerolipid metabolic process;lipid metabolic process;lipid transport;lo…	binding;carbohydrate derivative binding;enzyme activator activity;enzyme regulator activity;glycosaminoglycan binding;heparin binding;identical protein binding;lipase activator activity;lipid binding;lipoprotein lipase activator activity;molecular function activator activity;molecular function regulator activity;phospholipid binding;protein binding;sulfur compound binding	cell surface;cellular anatomical entity;chylomicron;extracellular space;high-density lipoprotein particle;lipoprotein particle;plasma lipoprotein particle;protein-containing complex;protein-lipid complex;triglyceride-rich plasma lipoprotein particle;very-low-density lipoprotein particle		0.0194305	1.63497
P31938	P31938	Map2k1	Map2k1	Dual specificity mitogen-activated protein kinase kinase 1	-0.362533	-1.39481	0.0929928	-0.602874	-0.225734	0.797537	-1.07358	-1.08867	1.02461	1.69214	1.17967	-0.185948	1.60511	-1.20927	-0.366383	0.117741	Cluster -359	acylglycerol homeostasis;anatomical structure development;anatomical structure formation involved in morphogenesis;anatomical structure morphogenesis;animal organ development;animal organ formation;animal organ morphogenesis;astrocyte differentiation;Bergmann glial cell differentiation;biological regulation;blood vessel development;blood vessel diameter maintenance;cell differentiation;cell motil…	adenyl nucleotide binding;adenyl ribonucleotide binding;anion binding;ATP binding;binding;carbohydrate derivative binding;catalytic activity;catalytic activity, acting on a protein;enzyme activator activity;enzyme binding;enzyme regulator activity;GTPase binding;heterocyclic compound binding;ion binding;kinase activator activity;kinase activity;kinase binding;kinase regulator activity;MAP kinase …	anchoring junction;axon;cell cortex;cell junction;cell projection;cell-substrate junction;cellular anatomical entity;cytoplasm;cytoplasmic region;cytoplasmic vesicle;cytosol;dendrite;dendrite cytoplasm;early endosome;endoplasmic reticulum;endosome;focal adhesion;glutamatergic synapse;Golgi apparatus;intracellular membrane-bounded organelle;intracellular organelle;intracellular vesicle;late endoso…	Acute myeloid leukemia;B cell receptor signaling pathway;Bladder cancer;Chemokine signaling pathway;Chronic myeloid leukemia;Colorectal cancer;Dorso-ventral axis formation;Endometrial cancer;ErbB signaling pathway;Fc epsilon RI signaling pathway;Fc gamma R-mediated phagocytosis;Focal adhesion;Gap junction;Glioma;GnRH signaling pathway;Insulin signaling pathway;Long-term depression;Long-term poten…	0.0496203	1.3075
P32261	P32261	Serpinc1	Serpinc1	Antithrombin-III	-0.631495	-1.16776	-0.171001	-0.595734	-0.00905263	0.812925	-1.54213	-0.978825	1.00129	1.5516	1.21984	0.0334074	1.57129	-1.0535	-0.454827	0.413957	Cluster -359	biological regulation;blood coagulation;coagulation;hemostasis;multicellular organismal process;regulation of biological process;regulation of biological quality;regulation of blood coagulation;regulation of body fluid levels;regulation of coagulation;regulation of hemostasis;regulation of multicellular organismal process;regulation of response to external stimulus;regulation of response to stimu…	binding;carbohydrate derivative binding;endopeptidase inhibitor activity;endopeptidase regulator activity;enzyme binding;enzyme inhibitor activity;enzyme regulator activity;glycosaminoglycan binding;heparin binding;identical protein binding;molecular function inhibitor activity;molecular function regulator activity;peptidase inhibitor activity;peptidase regulator activity;protease binding;protein…	cellular anatomical entity;collagen-containing extracellular matrix;external encapsulating structure;extracellular matrix;extracellular space	Complement and coagulation cascades	0.0263144	1.45743
P39749	P39749	Fen1	Fen1	Flap endonuclease 1	-0.768655	-1.29255	-0.35815	-0.802045	-0.134533	0.827575	-1.06979	-0.806379	1.10993	1.53664	1.10233	-0.346591	1.61891	-1.27284	0.122481	0.533658	Cluster -359	aromatic compound catabolic process;base-excision repair;behavior;biological regulation;catabolic process;cellular aromatic compound metabolic process;cellular catabolic process;cellular metabolic process;cellular nitrogen compound catabolic process;cellular nitrogen compound metabolic process;cellular process;cellular response to stimulus;cellular response to stress;cognition;DNA damage response…	5'-3' exonuclease activity;5'-flap endonuclease activity;binding;catalytic activity;catalytic activity, acting on a nucleic acid;catalytic activity, acting on DNA;catalytic activity, acting on RNA;cation binding;DNA binding;DNA endonuclease activity;DNA nuclease activity;endodeoxyribonuclease activity, producing 5'-phosphomonoesters;endonuclease activity;endonuclease activity, active with either …	cellular anatomical entity;intracellular membrane-bounded organelle;intracellular non-membrane-bounded organelle;intracellular organelle;membrane-bounded organelle;mitochondrion;non-membrane-bounded organelle;nucleolus;nucleoplasm;nucleus;organelle;protein-containing complex		0.0215387	1.21091
P01633	P01633	Igkv6-17	Igkv6-17	Immunoglobulin kappa chain variable 6-17	-0.360169	-1.25598	0.110968	-0.602191	-0.602191	0.734723	-1.30717	-0.876951	1.26148	1.32275	1.23482	-0.2335	1.65344	-1.16798	-0.463707	0.55165	Cluster -359	adaptive immune response;immune response;immune system process;response to stimulus		cellular anatomical entity;extracellular space;immunoglobulin complex;membrane;plasma membrane;protein-containing complex		0.031992	1.11977
Q91W10	Q91W10	Slc39a8	Slc39a8	Metal cation symporter ZIP8	-0.740136	-1.17709	0.142589	-0.784567	-0.362118	0.796843	-1.3512	-0.82968	1.05587	1.48018	1.29947	-0.0337342	1.59561	-1.01855	-0.570084	0.496598	Cluster -359	alpha-amino acid metabolic process;amino acid metabolic process;anatomical structure homeostasis;arginine metabolic process;aromatic compound biosynthetic process;bicarbonate transport;biological regulation;biosynthetic process;cadmium ion transmembrane transport;cadmium ion transport;carboxylic acid metabolic process;cartilage homeostasis;cell adhesion;cell-cell adhesion;cellular aromatic compou…	active monoatomic ion transmembrane transporter activity;active transmembrane transporter activity;bicarbonate transmembrane transporter activity;inorganic cation transmembrane transporter activity;inorganic molecular entity transmembrane transporter activity;metal ion transmembrane transporter activity;monoatomic cation transmembrane transporter activity;monoatomic cation:bicarbonate symporter a…	apical plasma membrane;basolateral plasma membrane;bounding membrane of organelle;cellular anatomical entity;lysosomal membrane;lytic vacuole membrane;membrane;organelle membrane;plasma membrane;plasma membrane region;vacuolar membrane		0.0253823	1.47893
Q9D067	Q9D067	Mdm1	Mdm1	Nuclear protein MDM1	-1.11015	-1.63351	0.0249553	-0.281521	-0.0317916	0.925214	-1.21134	-0.58141	0.874851	1.48593	1.17932	0.0708423	1.46638	-1.1459	-0.527742	0.495872	Cluster -359	anatomical structure development;biological regulation;developmental process;negative regulation of biological process;negative regulation of cell cycle;negative regulation of cell cycle process;negative regulation of cellular component organization;negative regulation of cellular process;negative regulation of centriole replication;negative regulation of centrosome cycle;negative regulation of c…	binding;cytoskeletal protein binding;microtubule binding;protein binding;tubulin binding	cell projection;cellular anatomical entity;centriolar satellite;centriole;centrosome;cilium;cytosol;intracellular membrane-bounded organelle;intracellular non-membrane-bounded organelle;intracellular organelle;membrane-bounded organelle;microtubule;microtubule organizing center;non-membrane-bounded organelle;non-motile cilium;nucleus;organelle;plasma membrane bounded cell projection;polymeric cyt…		0.0468144	1.31961
Q5U405	Q5U405	Tmprss13	Tmprss13	Transmembrane protease serine 13	-0.5877	-0.631087	0.169792	-0.771603	-0.453512	1.02646	-1.66229	-1.12591	1.1908	1.4448	0.977759	0.0217244	1.42788	-1.31698	-0.0349936	0.324855	Cluster -359	anatomical structure development;developmental process;epidermis development;epithelium development;establishment of skin barrier;macromolecule metabolic process;metabolic process;nitrogen compound metabolic process;organic substance metabolic process;organonitrogen compound metabolic process;primary metabolic process;protein metabolic process;proteolysis;skin epidermis development;tissue develop…	catalytic activity;catalytic activity, acting on a protein;endopeptidase activity;hydrolase activity;peptidase activity;serine hydrolase activity;serine-type endopeptidase activity;serine-type peptidase activity	cellular anatomical entity;cytoplasm;extracellular region;membrane;plasma membrane		0.0384986	1.22012
Q9CPN9	Q9CPN9	Prss3b	Prss3b	RIKEN cDNA 2210010C04 gene	-0.534715	-0.873811	-0.234854	-0.52772	-0.383474	0.939264	-1.67227	-1.16205	0.841561	1.56787	0.998048	0.222343	1.61787	-1.21499	0.053288	0.363634	Cluster -359	macromolecule metabolic process;metabolic process;nitrogen compound metabolic process;organic substance metabolic process;organonitrogen compound metabolic process;primary metabolic process;protein maturation;protein metabolic process;protein processing;proteolysis;zymogen activation	catalytic activity;catalytic activity, acting on a protein;endopeptidase activity;hydrolase activity;peptidase activity;serine hydrolase activity;serine-type endopeptidase activity;serine-type peptidase activity	cellular anatomical entity;extracellular space	Neuroactive ligand-receptor interaction;Pancreatic secretion;Protein digestion and absorption	0.0199469	1.36154
Q8BX17	Q8BX17	Gemin5	Gemin5	Gem-associated protein 5	-0.893577	-0.924066	0.31674	-0.614131	-0.229329	0.514781	-2.12103	-1.01682	0.922532	1.54181	1.04149	-0.092165	1.53928	-0.229329	-0.229329	0.473147	Cluster -359	amide biosynthetic process;amide metabolic process;biological regulation;biosynthetic process;cellular biosynthetic process;cellular component assembly;cellular component organization;cellular component organization or biogenesis;cellular metabolic process;cellular nitrogen compound biosynthetic process;cellular nitrogen compound metabolic process;cellular process;macromolecule biosynthetic proce…	binding;mRNA 3'-UTR binding;mRNA binding;nucleic acid binding;organic cyclic compound binding;protein-containing complex binding;ribonucleoprotein complex binding;ribosome binding;RNA 7-methylguanosine cap binding;RNA binding;RNA cap binding;snRNA binding;U1 snRNA binding;U4 snRNA binding;U4atac snRNA binding	cellular anatomical entity;cytoplasm;cytosol;Gemini of coiled bodies;intracellular membrane-bounded organelle;intracellular organelle;membrane-bounded organelle;nuclear body;nuclear protein-containing complex;nucleoplasm;nucleus;organelle;protein-containing complex;RNA polymerase II transcription regulator complex;Sm-like protein family complex;SMN complex;SMN-Gemin2 complex;SMN-Sm protein comple…	RNA transport	0.00742023	1.73313
Q9ES89	Q9ES89	Extl2	Extl2	Exostosin-like 2	-0.752801	-1.20916	0.148121	-0.324804	-0.090977	0.790028	-1.66584	-0.905237	1.08308	1.58662	1.12742	0.0827993	1.46605	-1.08845	-0.500296	0.253445	Cluster -359	amino sugar metabolic process;carbohydrate derivative metabolic process;cellular aromatic compound metabolic process;cellular metabolic process;cellular nitrogen compound metabolic process;cellular process;glucosamine-containing compound metabolic process;heterocycle metabolic process;metabolic process;N-acetylglucosamine metabolic process;nitrogen compound metabolic process;nucleobase-containing…	acetylgalactosaminyltransferase activity;acetylglucosaminyltransferase activity;alpha-1,4-N-acetylgalactosaminyltransferase activity;binding;carbohydrate derivative binding;catalytic activity;cation binding;glucuronyl-galactosyl-proteoglycan 4-alpha-N-acetylglucosaminyltransferase activity;glucuronylgalactosylproteoglycan 4-beta-N-acetylgalactosaminyltransferase activity;glycosaminoglycan binding…	cellular anatomical entity;cytosol;endoplasmic reticulum;endoplasmic reticulum membrane;intracellular membrane-bounded organelle;intracellular organelle;membrane;membrane-bounded organelle;nucleoplasm;organelle;organelle membrane	Glycosaminoglycan biosynthesis - heparan sulfate	0.0399444	1.38448
Q61730	Q61730	Il1rap	Il1rap	Interleukin-1 receptor accessory protein	-0.795651	-1.23446	-0.102139	-0.181058	0.212161	0.569287	-1.85988	-0.941713	0.937543	1.48439	1.20039	0.140844	1.37751	-1.00923	-0.449047	0.651049	Cluster -359	biological process involved in interspecies interaction between organisms;biological regulation;cell adhesion;cell communication;cell surface receptor signaling pathway;cell-cell adhesion;cell-cell adhesion via plasma-membrane adhesion molecules;cell-cell signaling;cellular process;cytokine-mediated signaling pathway;defense response;defense response to other organism;immune response;immune syste…	binding;catalytic activity;coreceptor activity;cytokine receptor activity;cytokine receptor binding;growth factor receptor binding;hydrolase activity;hydrolase activity, acting on glycosyl bonds;hydrolase activity, hydrolyzing N-glycosyl compounds;immune receptor activity;interleukin-1 receptor activity;interleukin-1 receptor binding;interleukin-33 receptor activity;molecular transducer activity;…	cell junction;cellular anatomical entity;extracellular region;glutamatergic synapse;membrane;plasma membrane;protein-containing complex;synapse	Apoptosis;Cytokine-cytokine receptor interaction	0.0242438	1.47838
Q9D5R2	Q9D5R2	Wdr20	Wdr20	WD repeat-containing protein 20	-0.643856	-0.894513	0.0922537	-0.267401	-0.0875971	0.478557	-2.43344	-0.653401	1.06638	1.32517	0.958595	-0.244102	1.50586	-0.717121	-0.151345	0.665964	Cluster -359					0.0213622	1.83869
Q8C042	Q8C042	Eno4	Eno4	Enolase 4	-0.671498	-0.89653	0.0461756	-0.502906	-0.0419491	0.828774	-2.23492	-0.728014	1.08196	1.39776	0.807608	0.199067	1.44269	-0.845015	-0.515343	0.632148	Cluster -359	ADP catabolic process;ADP metabolic process;aromatic compound catabolic process;ATP metabolic process;carbohydrate catabolic process;carbohydrate derivative catabolic process;carbohydrate derivative metabolic process;carbohydrate metabolic process;carboxylic acid metabolic process;catabolic process;cell motility;cell projection organization;cellular aromatic compound metabolic process;cellular ca…	binding;carbon-oxygen lyase activity;catalytic activity;cation binding;hydro-lyase activity;ion binding;lyase activity;magnesium ion binding;metal ion binding;phosphopyruvate hydratase activity	catalytic complex;cellular anatomical entity;phosphopyruvate hydratase complex;protein-containing complex;sperm principal piece		0.0299798	1.77635
P07724	P07724	Alb	Alb	Albumin	-0.760989	-0.962695	0.102198	-0.354687	-0.06971	0.632758	-2.05329	-0.895663	0.874279	1.75603	0.947386	-0.0957817	1.41338	-0.767964	-0.413995	0.648747	Cluster -359	biological regulation;cell communication;cellular process;cellular response to external stimulus;cellular response to extracellular stimulus;cellular response to nutrient levels;cellular response to starvation;cellular response to stimulus;cellular response to stress;localization;maintenance of location;maintenance of location in cell;maintenance of mitochondrion location;maintenance of organelle…	anion binding;binding;carboxylic acid binding;cation binding;DNA binding;enterobactin binding;enzyme binding;exogenous protein binding;fatty acid binding;heterocyclic compound binding;identical protein binding;ion binding;lipid binding;macrolide binding;metal ion binding;modified amino acid binding;monocarboxylic acid binding;nucleic acid binding;organic acid binding;organic cyclic compound bindi…	basement membrane;cellular anatomical entity;collagen-containing extracellular matrix;cytoplasm;endoplasmic reticulum;external encapsulating structure;extracellular exosome;extracellular matrix;extracellular membrane-bounded organelle;extracellular organelle;extracellular region;extracellular space;extracellular vesicle;Golgi apparatus;intracellular membrane-bounded organelle;intracellular organe…		0.0231246	1.75564		ALB
O89020	O89020	Afm	Afm	Afamin	-0.566289	-1.09517	0.0982893	-0.382135	0.0822922	0.737657	-2.14407	-0.800644	0.728154	1.45621	1.1267	0.0618711	1.42266	-0.74139	-0.712296	0.728154	Cluster -359	biological regulation;cellular localization;cellular macromolecule localization;cellular process;establishment of localization;establishment of protein localization;establishment of protein localization to extracellular region;localization;macromolecule localization;nitrogen compound transport;organic substance transport;protein localization;protein localization to extracellular region;protein st…	binding;heterocyclic compound binding;organic cyclic compound binding;small molecule binding;vitamin binding;vitamin E binding	cellular anatomical entity;cytoplasm;extracellular space		0.0365979	1.69945
D3YXG0	D3YXG0	Hmcn1	Hmcn1	Hemicentin-1	-0.434163	-1.01601	0.103162	-0.496669	-0.00970053	0.83274	-2.09696	-0.912274	0.972443	1.38024	1.05063	0.056437	1.30058	-1.19679	-0.218851	0.685179	Cluster -359	actin cytoskeleton organization;actin filament-based process;basement membrane organization;biological process involved in interspecies interaction between organisms;cell adhesion;cell cycle;cell division;cell-cell adhesion;cell-cell adhesion via plasma-membrane adhesion molecules;cellular component organization;cellular component organization or biogenesis;cellular process;cytoskeleton organizat…	binding;calcium ion binding;cation binding;ion binding;metal ion binding	adherens junction;anchoring junction;basement membrane;cell cortex;cell junction;cell-cell junction;cell-substrate junction;cellular anatomical entity;cleavage furrow;collagen-containing extracellular matrix;cytoplasm;external encapsulating structure;extracellular matrix;extracellular region;membrane;muscle tendon junction;plasma membrane region		0.0388382	1.54282
Q00724	Q00724	Rbp4	Rbp4	Retinol-binding protein 4	-0.695831	-1.03905	0.225909	-0.545107	-0.0319876	0.773702	-1.88058	-0.950412	0.873665	1.53005	1.08008	-0.0997185	1.47801	-1.0758	-0.246921	0.603992	Cluster -359	alcohol metabolic process;anatomical structure development;anatomical structure formation involved in morphogenesis;anatomical structure homeostasis;anatomical structure morphogenesis;animal organ development;animal organ morphogenesis;biological regulation;biosynthetic process;carbohydrate biosynthetic process;carbohydrate homeostasis;carbohydrate metabolic process;cardiac muscle tissue developm…	alcohol binding;alcohol transmembrane transporter activity;binding;isoprenoid binding;lipid binding;lipid transporter activity;organic hydroxy compound transmembrane transporter activity;protein-containing complex binding;retinal binding;retinoid binding;retinol binding;retinol transmembrane transporter activity;small molecule binding;transmembrane transporter activity;transporter activity;vitami…	cellular anatomical entity;extracellular space;protein-containing complex		0.0327663	1.50923
Q3TWH3	Q3TWH3	Pnrc1	Pnrc1	Proline-rich nuclear receptor coactivator 1	-0.736198	-1.18075	0.150633	-0.288839	0.0556716	0.849123	-2.05298	-0.883794	0.916902	1.38033	1.04675	0.0627837	1.34683	-0.980797	-0.375202	0.689545	Cluster -359	aromatic compound catabolic process;biological regulation;catabolic process;cellular aromatic compound metabolic process;cellular catabolic process;cellular metabolic process;cellular nitrogen compound catabolic process;cellular nitrogen compound metabolic process;cellular process;heterocycle catabolic process;heterocycle metabolic process;macromolecule catabolic process;macromolecule metabolic p…		cellular anatomical entity;cytoplasmic ribonucleoprotein granule;intracellular membrane-bounded organelle;intracellular non-membrane-bounded organelle;intracellular organelle;membrane-bounded organelle;non-membrane-bounded organelle;nucleus;organelle;P-body;ribonucleoprotein granule;supramolecular complex		0.035677	1.57619
A2RT60	A2RT60	Htra4	Htra4	Serine protease HTRA4	-0.496563	-1.00972	0.210988	-0.440379	-0.104348	0.712377	-1.95895	-0.945077	1.01593	1.50376	0.989398	-0.0747395	1.55665	-1.00725	-0.490653	0.538578	Cluster -359	biological regulation;cell death;cellular process;macromolecule metabolic process;metabolic process;nitrogen compound metabolic process;organic substance metabolic process;organonitrogen compound metabolic process;positive regulation of apoptotic process;positive regulation of biological process;positive regulation of cellular process;positive regulation of programmed cell death;primary metabolic…	binding;catalytic activity;catalytic activity, acting on a protein;endopeptidase activity;hydrolase activity;identical protein binding;peptidase activity;protein binding;serine hydrolase activity;serine-type endopeptidase activity;serine-type peptidase activity	cellular anatomical entity;extracellular region		0.0387357	1.4517
P35396	P35396	Ppard	Ppard	Peroxisome proliferator-activated receptor delta	-0.558902	-0.963244	0.102847	-0.323958	-0.108863	0.756428	-2.32512	-0.952522	0.971264	1.33597	0.999391	0.139156	1.40773	-0.772607	-0.289129	0.58157	Cluster -359	adipose tissue development;ameboidal-type cell migration;anatomical structure development;animal organ development;apoptotic process;apoptotic signaling pathway;axon ensheathment;biological regulation;biosynthetic process;blood vessel diameter maintenance;carbohydrate derivative metabolic process;carboxylic acid catabolic process;carboxylic acid metabolic process;carboxylic acid transport;catabol…	anion binding;binding;carboxylic acid binding;cation binding;cis-regulatory region sequence-specific DNA binding;DNA binding;DNA-binding transcription factor activity;DNA-binding transcription factor activity, RNA polymerase II-specific;DNA-binding transcription factor binding;DNA-binding transcription repressor activity;DNA-binding transcription repressor activity, RNA polymerase II-specific;dou…	cellular anatomical entity;chromatin;intracellular membrane-bounded organelle;intracellular organelle;membrane-bounded organelle;nucleus;organelle;protein-containing complex;protein-DNA complex	Acute myeloid leukemia;Pathways in cancer;PPAR signaling pathway;Wnt signaling pathway	0.0226956	1.73099
Q9EQT3	Q9EQT3	Rhou	Rhou	Rho-related GTP-binding protein RhoU	-0.61254	-0.993918	0.213625	-0.527133	-0.201505	0.63455	-2.23254	-1.04125	0.822423	1.30302	1.11037	0.13786	1.50937	-0.691938	-0.0732227	0.642825	Cluster -359	actin cytoskeleton organization;actin filament organization;actin filament-based process;biological regulation;Cdc42 protein signal transduction;cell cycle G1/S phase transition;cell cycle phase transition;cell cycle process;cellular component organization;cellular component organization or biogenesis;cellular process;cytoskeleton organization;endocytosis;establishment of localization;establishme…	anion binding;binding;carbohydrate derivative binding;catalytic activity;cation binding;enzyme binding;GTP binding;GTPase activity;guanyl nucleotide binding;guanyl ribonucleotide binding;heterocyclic compound binding;hydrolase activity;hydrolase activity, acting on acid anhydrides;hydrolase activity, acting on acid anhydrides, in phosphorus-containing anhydrides;ion binding;kinase binding;metal i…	anchoring junction;bounding membrane of organelle;cell junction;cell projection;cell-substrate junction;cellular anatomical entity;focal adhesion;Golgi membrane;intracellular non-membrane-bounded organelle;intracellular organelle;membrane;non-membrane-bounded organelle;organelle;organelle membrane;plasma membrane;podosome		0.0112967	1.95928
A0A5F8MPV2	A0A5F8MPV2	Slk	Slk	STE20-like kinase (Fragment)	-0.365032	-0.938957	0.183893	-0.315576	0.0677508	0.632706	-2.3214	-1.1723	0.76207	1.28592	1.10951	0.0325558	1.4356	-0.876943	-0.128639	0.608849	Cluster -359					0.0286878	1.74069
F8VPT3	F8VPT3	Lct	Lct	Lactase	0.910235	0.24703	-0.949874	-0.843991	-0.735701	-0.838992	-1.31662	-0.481133	-0.279951	0.793479	0.169211	-1.15185	0.17796	1.03555	1.00409	2.26056	Cluster -359	amide metabolic process;carbohydrate catabolic process;carbohydrate derivative catabolic process;carbohydrate derivative metabolic process;carbohydrate metabolic process;catabolic process;cellobiose catabolic process;cellobiose metabolic process;cellular catabolic process;cellular lipid catabolic process;cellular lipid metabolic process;cellular metabolic process;cellular process;ceramide catabol…	beta-glucosidase activity;binding;catalytic activity;galactosylceramidase activity;glucosidase activity;glucosylceramidase activity;hydrolase activity;hydrolase activity, acting on glycosyl bonds;hydrolase activity, hydrolyzing O-glycosyl compounds;identical protein binding;lactase activity;phlorizin hydrolase activity;protein binding;protein dimerization activity;protein homodimerization activit…	brush border;cellular anatomical entity;cluster of actin-based cell projections;external side of apical plasma membrane;external side of plasma membrane;side of membrane	Carbohydrate digestion and absorption;Galactose metabolism	0.0400382	1.5091
Q80TV8;Q8BRT1	Q80TV8	Clasp1;Clasp2	Clasp1	CLIP-associating protein 1	-0.00104964	-0.884065	-0.753945	-1.21212	0.0667358	0.196248	-2.13148	0.519372	0.0722349	1.49327	0.741235	0.30263	0.999359	1.44946	0.271455	-1.12934	Cluster -359	astral microtubule organization;biological regulation;cell cycle phase transition;cell cycle process;cell division;cell migration;cell motility;cellular component assembly;cellular component organization;cellular component organization or biogenesis;cellular process;cytoplasmic microtubule organization;cytoskeleton organization;establishment of cell polarity;establishment of localization;establis…	binding;cytoskeletal protein binding;dystroglycan binding;kinetochore binding;microtubule binding;microtubule plus-end binding;protein binding;tubulin binding	basal cortex;cell cortex;cell cortex region;cellular anatomical entity;centrosomal corona;centrosome;cortical cytoskeleton;cortical microtubule cytoskeleton;cytoplasm;cytoplasmic microtubule;cytoplasmic region;cytoskeleton;Golgi apparatus;intracellular membrane-bounded organelle;intracellular non-membrane-bounded organelle;intracellular organelle;kinetochore;membrane-bounded organelle;microtubule…		0.0300061	1.07625	CLASP1
Q8C6B2	Q8C6B2	Rtkn	Rtkn	Rhotekin	-0.54151	-0.526334	-0.610362	0.265983	1.42191	-1.53002	-1.59846	-1.48213	0.0302268	1.18831	0.500597	-0.1047	0.686877	0.175932	0.593039	1.53065	Cluster -359	actin cytoskeleton organization;actin filament-based process;actomyosin contractile ring assembly;actomyosin contractile ring organization;actomyosin structure organization;apoptotic process;assembly of actomyosin apparatus involved in cytokinesis;biological regulation;cell cycle process;cell death;cellular component assembly;cellular component organization;cellular component organization or biog…	anion binding;binding;carbohydrate derivative binding;enzyme binding;enzyme inhibitor activity;enzyme regulator activity;GTP binding;GTPase binding;GTPase inhibitor activity;GTPase regulator activity;guanyl nucleotide binding;guanyl ribonucleotide binding;heterocyclic compound binding;ion binding;molecular function inhibitor activity;molecular function regulator activity;nucleoside phosphate bind…	actomyosin contractile ring;cellular anatomical entity;contractile ring;cytosol		0.0152626	1.10539
Q64310	Q64310	Surf4	Surf4	Surfeit locus protein 4	-0.672308	0.25726	-1.08144	0.441565	0.44642	-1.39126	-1.38788	-0.559593	-0.0060791	2.06569	-0.0306922	0.862878	0.422592	-1.29649	0.894422	1.0349	Cluster -359	biological regulation;cellular component organization;cellular component organization or biogenesis;cellular localization;cellular macromolecule localization;cellular process;chemical homeostasis;establishment of localization;establishment of protein localization;Golgi organization;homeostatic process;lipid homeostasis;lipoprotein localization;lipoprotein transport;localization;macromolecule loca…	cargo receptor activity	bounding membrane of organelle;cellular anatomical entity;cytosol;endoplasmic reticulum;endoplasmic reticulum membrane;endoplasmic reticulum-Golgi intermediate compartment;endoplasmic reticulum-Golgi intermediate compartment membrane;Golgi apparatus;Golgi membrane;intracellular membrane-bounded organelle;intracellular organelle;membrane;membrane-bounded organelle;nuclear membrane;organelle;organe…		0.0437663	0.939597
E9Q414	E9Q414	Apob	Apob	Apolipoprotein B-100	-0.170574	0.652941	-0.871499	0.243817	0.399485	-2.2617	-1.81756	-0.107583	1.15624	-0.735743	0.000731036	0.569169	0.495901	0.416023	1.49126	0.539089	Cluster -359	acylglycerol catabolic process;acylglycerol metabolic process;alcohol metabolic process;anatomical structure development;anatomical structure morphogenesis;artery morphogenesis;biological process involved in interspecies interaction between organisms;biological regulation;biosynthetic process;blood vessel morphogenesis;catabolic process;cell motility;cellular biosynthetic process;cellular catabol…	binding;carbohydrate derivative binding;cholesterol transfer activity;enzyme binding;glycosaminoglycan binding;heparin binding;lipase binding;lipid binding;lipid transfer activity;lipid transporter activity;lipoprotein particle receptor binding;low-density lipoprotein particle receptor binding;phospholipid binding;protein binding;signaling receptor binding;sterol transfer activity;sterol transpor…	cell body;cellular anatomical entity;chylomicron;cytoplasm;cytosol;endoplasmic reticulum;endoplasmic reticulum exit site;extracellular region;extracellular space;high-density lipoprotein particle;intermediate-density lipoprotein particle;intracellular membrane-bounded organelle;intracellular non-membrane-bounded organelle;intracellular organelle;lipid droplet;lipoprotein particle;low-density lipo…	Fat digestion and absorption;Vitamin digestion and absorption	0.0446807	1.27017
Q99KN1	Q99KN1	Arrdc1	Arrdc1	Arrestin domain-containing protein 1	-1.40456	-1.18031	-0.756977	-1.50382	-1.06849	-0.440605	0.562268	1.57481	0.437433	1.82943	0.157309	0.109476	0.154612	0.804761	0.0807418	0.643922	Cluster -359	biological regulation;catabolic process;cellular component biogenesis;cellular component organization or biogenesis;cellular localization;cellular macromolecule localization;cellular process;establishment of localization;establishment of protein localization;extracellular transport;extracellular vesicle biogenesis;localization;macromolecule catabolic process;macromolecule localization;macromolecu…	arrestin family protein binding;binding;enzyme binding;enzyme-substrate adaptor activity;identical protein binding;molecular adaptor activity;protein binding;protein-macromolecule adaptor activity;ubiquitin ligase-substrate adaptor activity;ubiquitin protein ligase binding;ubiquitin-like protein ligase binding	cellular anatomical entity;cytoplasm;cytoplasmic vesicle;extracellular membrane-bounded organelle;extracellular organelle;extracellular vesicle;intracellular membrane-bounded organelle;intracellular organelle;intracellular vesicle;membrane;membrane-bounded organelle;organelle;plasma membrane;vesicle		0.0291997	0.927894
Q8K3G9	Q8K3G9	Appl2	Appl2	DCC-interacting protein 13-beta	-1.14242	0.378717	-0.0141148	-0.997747	-0.835031	-0.569666	-2.06476	1.18616	-0.296498	1.64816	0.381661	-0.183956	0.807878	0.354695	-0.0992997	1.44622	Cluster -359	adaptive thermogenesis;adiponectin-activated signaling pathway;biological regulation;carbohydrate homeostasis;cell cycle;cell population proliferation;cell surface receptor signaling pathway;cellular component assembly;cellular component organization;cellular component organization or biogenesis;cellular localization;cellular macromolecule localization;cellular process;cellular response to endoge…	binding;enzyme binding;GTPase binding;identical protein binding;lipid binding;modified amino acid binding;phosphatidylinositol binding;phosphatidylserine binding;phospholipid binding;protein binding;protein dimerization activity;protein homodimerization activity;protein-containing complex binding;small GTPase binding	bounding membrane of organelle;cell projection;cell projection membrane;cellular anatomical entity;cytoplasm;cytoplasmic vesicle;cytoplasmic vesicle membrane;early endosome membrane;early phagosome;early phagosome membrane;endocytic vesicle;endocytic vesicle membrane;endosome;endosome membrane;intracellular membrane-bounded organelle;intracellular organelle;intracellular vesicle;leading edge memb…		0.0372126	1.07028
P70658	P70658	Cxcr4	Cxcr4	C-X-C chemokine receptor type 4	-0.172159	-0.901366	-0.973505	-0.577961	-0.762191	0.0759698	-2.23149	1.25438	0.314214	0.947175	1.68112	-0.208979	1.351	0.158591	-0.0756847	0.120889	Cluster -359	ameboidal-type cell migration;anatomical structure development;anatomical structure morphogenesis;animal organ development;animal organ morphogenesis;aorta development;artery development;axon guidance;biological regulation;blood vessel development;blood vessel endothelial cell migration;brain development;branching involved in blood vessel morphogenesis;branching morphogenesis of an epithelial tub…	actin binding;binding;C-C chemokine binding;C-C chemokine receptor activity;chemokine binding;chemokine receptor activity;C-X-C chemokine receptor activity;C-X-C motif chemokine 12 receptor activity;cytokine binding;cytokine receptor activity;cytoskeletal protein binding;enzyme binding;G protein-coupled chemoattractant receptor activity;G protein-coupled receptor activity;immune receptor activity…	anchoring junction;cell junction;cell leading edge;cell surface;cell-cell junction;cellular anatomical entity;cytoplasmic vesicle;early endosome;endosome;external side of plasma membrane;growth cone;intracellular membrane-bounded organelle;intracellular organelle;intracellular vesicle;late endosome;lysosome;lytic vacuole;membrane;membrane-bounded organelle;organelle;plasma membrane;protein-contai…	Axon guidance;Chemokine signaling pathway;Cytokine-cytokine receptor interaction;Endocytosis;Intestinal immune network for IgA production;Leukocyte transendothelial migration	0.0260922	1.2263
Q91W50	Q91W50	Csde1	Csde1	Cold shock domain-containing protein E1	-0.793576	1.54519	0.497517	0.843307	1.78388	-0.384824	0.874623	0.177209	-1.2345	-0.801469	-1.9741	-0.327727	0.0246164	-0.0723085	-0.673961	0.516116	Cluster -360	aromatic compound catabolic process;biological regulation;catabolic process;cellular aromatic compound metabolic process;cellular catabolic process;cellular component assembly;cellular component organization;cellular component organization or biogenesis;cellular metabolic process;cellular nitrogen compound catabolic process;cellular nitrogen compound metabolic process;cellular process;CRD-mediate…	binding;nucleic acid binding;organic cyclic compound binding;RNA binding;RNA stem-loop binding	cellular anatomical entity;CRD-mediated mRNA stability complex;cytoplasmic ribonucleoprotein granule;cytoplasmic stress granule;cytosol;Golgi apparatus;intracellular membrane-bounded organelle;intracellular non-membrane-bounded organelle;intracellular organelle;intracellular protein-containing complex;mCRD-mediated mRNA stability complex;membrane;membrane-bounded organelle;mitochondrial inner mem…		0.0169319	-1.02947	CSDE1
P49446	P49446	Ptpre	Ptpre	Receptor-type tyrosine-protein phosphatase epsilon	-0.585083	-1.88999	0.0342051	-0.274322	-0.589343	-0.206922	-1.65425	0.872451	1.41277	2.0411	0.0296115	-0.473601	0.717394	0.160533	0.438843	-0.0333996	Cluster -359	biological regulation;cell surface receptor signaling pathway;cellular metabolic process;cellular process;dephosphorylation;enzyme-linked receptor protein signaling pathway;metabolic process;negative regulation of biological process;negative regulation of cell communication;negative regulation of cellular process;negative regulation of cellular response to insulin stimulus;negative regulation of …	binding;catalytic activity;catalytic activity, acting on a protein;hydrolase activity;hydrolase activity, acting on ester bonds;identical protein binding;phosphatase activity;phosphoprotein phosphatase activity;phosphoric ester hydrolase activity;protein binding;protein tyrosine phosphatase activity	cellular anatomical entity;cytoplasm;intracellular membrane-bounded organelle;intracellular organelle;membrane;membrane-bounded organelle;nucleus;organelle;plasma membrane		0.0258851	1.27459
Q61361	Q61361	Bcan	Bcan	Brevican core protein	-0.311207	-0.591658	-0.690018	-0.903331	-1.0642	0.304633	-1.39154	-0.337316	2.46829	0.593824	1.54967	-0.779908	0.439939	0.518533	0.254207	-0.0599288	Cluster -359	anatomical structure development;biological regulation;cell adhesion;cell differentiation;cell growth;cell junction organization;cell-matrix adhesion;cell-substrate adhesion;cellular component organization;cellular component organization or biogenesis;cellular developmental process;cellular process;central nervous system development;developmental cell growth;developmental growth;developmental gro…	binding;calcium ion binding;carbohydrate binding;carbohydrate derivative binding;cation binding;glycosaminoglycan binding;hyaluronic acid binding;ion binding;metal ion binding	axon;axon initial segment;cell junction;cell projection;cell surface;cellular anatomical entity;collagen-containing extracellular matrix;dendrite;external encapsulating structure;extracellular matrix;extracellular space;GABA-ergic synapse;glutamatergic synapse;membrane;neuron projection;node of Ranvier;perineuronal net;perisynaptic extracellular matrix;plasma membrane bounded cell projection;plas…		0.00715291	2.38339
Q3UGR5	Q3UGR5	Hdhd2	Hdhd2	Haloacid dehalogenase-like hydrolase domain-containing protein 2	0.355805	-1.20217	-1.2275	-1.66574	-0.097525	0.421369	-1.26167	0.217246	1.16682	0.34112	0.388188	-0.901311	0.947899	0.623826	1.89529	-0.00163394	Cluster -359	cellular metabolic process;cellular process;dephosphorylation;metabolic process;phosphate-containing compound metabolic process;phosphorus metabolic process	binding;catalytic activity;cation binding;enzyme binding;hydrolase activity;hydrolase activity, acting on ester bonds;ion binding;metal ion binding;phosphatase activity;phosphoric ester hydrolase activity;protein binding			0.0195878	0.984401
Q8CFG0	Q8CFG0	Sulf2	Sulf2	Extracellular sulfatase Sulf-2	0.496765	-1.15098	-1.17817	-1.71705	-0.924674	0.0583095	-0.797048	0.314536	1.51711	0.493496	-0.515124	-0.0919373	0.813071	0.280088	1.92783	0.473761	Cluster -359	anatomical structure development;animal organ development;animal organ regeneration;biological regulation;bone development;carbohydrate derivative metabolic process;cartilage development;cell development;cell surface receptor signaling pathway;cellular component organization;cellular component organization or biogenesis;cellular developmental process;cellular metabolic process;cellular process;ch…	arylsulfatase activity;binding;calcium ion binding;carbohydrate derivative binding;catalytic activity;cation binding;glycosaminoglycan binding;hydrolase activity;hydrolase activity, acting on ester bonds;ion binding;metal ion binding;N-acetylglucosamine-6-sulfatase activity;sulfuric ester hydrolase activity	cell surface;cellular anatomical entity;endoplasmic reticulum;extracellular region;extracellular space;Golgi apparatus subcompartment;Golgi stack;intracellular membrane-bounded organelle;intracellular organelle;membrane;membrane-bounded organelle;organelle;organelle subcompartment;plasma membrane		0.00857549	1.63162
P70211	P70211	Dcc	Dcc	Netrin receptor DCC	0.757638	0.254197	-0.945105	-1.38275	-1.16772	-0.744164	-1.45721	0.595668	0.541389	-0.651361	1.60461	1.29312	0.171041	0.908543	0.922487	-0.700378	Cluster -359	anatomical structure morphogenesis;anterior/posterior axon guidance;apoptotic process;axon guidance;axonogenesis;biological regulation;cell adhesion;cell death;cell migration;cell motility;cell projection morphogenesis;cell projection organization;cell-cell adhesion;cellular anatomical entity morphogenesis;cellular component organization;cellular component organization or biogenesis;cellular proc…	binding;identical protein binding;molecular transducer activity;netrin receptor activity;protein binding;signaling receptor activity;transcription coactivator activity;transcription coregulator activity;transcription regulator activity;transmembrane signaling receptor activity	axon;axonal growth cone;cell junction;cell projection;cell surface;cellular anatomical entity;growth cone;growth cone membrane;membrane;neuron projection;plasma membrane;plasma membrane bounded cell projection;plasma membrane region;postsynaptic density membrane;postsynaptic specialization membrane;Schaffer collateral - CA1 synapse;site of polarized growth;synapse;synaptic membrane	Axon guidance;Colorectal cancer;Pathways in cancer	0.0355536	1.90746	DCC
P12960	P12960	Cntn1	Cntn1	Contactin-1	1.32447	-0.96527	-0.57573	-0.9199	-1.05303	-0.204974	-1.55843	-0.704947	1.443	0.140617	1.48306	0.255019	0.750439	1.33242	-0.568258	-0.178491	Cluster -359	anatomical structure development;anatomical structure formation involved in morphogenesis;animal organ development;axon ensheathment;axon guidance;behavior;biological regulation;biosynthetic process;brain development;cell adhesion;cell projection organization;cell surface receptor signaling pathway;cell-cell adhesion;cellular biosynthetic process;cellular component assembly;cellular component ass…	binding;carbohydrate binding;cell adhesion mediator activity;cell adhesion molecule binding;cell-cell adhesion mediator activity;protein binding	axon;cell projection;cellular anatomical entity;membrane;myelin sheath;neuron projection;plasma membrane;plasma membrane bounded cell projection;plasma membrane region;postsynaptic membrane;presynaptic membrane;side of membrane;synaptic membrane	Cell adhesion molecules (CAMs)	0.013743	1.64779
Q91XM9	Q91XM9	Dlg2	Dlg2	Disks large homolog 2	0.528157	0.327111	-1.23908	-0.733776	-1.58146	-1.77376	-1.04963	1.50995	0.277442	0.0536189	0.180178	1.19153	0.0752851	1.15181	0.715864	0.366772	Cluster -359	anterograde axonal protein transport;anterograde axonal transport;anterograde trans-synaptic signaling;axo-dendritic protein transport;axo-dendritic transport;axonal transport;biological regulation;cell adhesion;cell communication;cell-cell adhesion;cell-cell signaling;cellular component organization;cellular component organization or biogenesis;cellular localization;cellular macromolecule locali…	binding;enzyme binding;kinase binding;PDZ domain binding;phosphatase binding;protein binding;protein domain specific binding;protein phosphatase binding;protein-containing complex binding;structural constituent of postsynapse;structural constituent of postsynaptic density;structural constituent of postsynaptic specialization;structural constituent of synapse;structural molecule activity	axon cytoplasm;axon initial segment;basolateral plasma membrane;bounding membrane of organelle;cell body;cell junction;cell projection;cellular anatomical entity;cytoplasm;cytoplasmic region;cytoplasmic vesicle membrane;dendrite;exocytic vesicle membrane;glutamatergic synapse;juxtaparanode region of axon;membrane;neuromuscular junction;neuron projection;neuron projection cytoplasm;neuronal cell b…		0.0398376	0.976515	DLG2
Q9Z218	Q9Z218	Dpp6	Dpp6	Dipeptidyl aminopeptidase-like protein 6	-1.29159	0.514921	-0.76286	-0.95321	-0.892479	-0.933167	-1.41898	0.927113	1.14889	-0.0832682	1.36879	0.600929	0.189349	1.80183	0.181962	-0.398237	Cluster -359	action potential;biological regulation;cellular localization;cellular macromolecule localization;cellular process;establishment of localization;establishment of localization in cell;inorganic cation transmembrane transport;inorganic ion transmembrane transport;localization;localization within membrane;macromolecule localization;macromolecule metabolic process;metabolic process;metal ion transport…	catalytic activity;catalytic activity, acting on a protein;channel regulator activity;hydrolase activity;ion channel regulator activity;molecular function regulator activity;peptidase activity;potassium channel regulator activity;serine hydrolase activity;serine-type peptidase activity;transporter regulator activity	cation channel complex;cell body;cell surface;cellular anatomical entity;membrane;membrane protein complex;monoatomic ion channel complex;neuronal cell body;plasma membrane;plasma membrane protein complex;potassium channel complex;protein-containing complex;transmembrane transporter complex;transporter complex;voltage-gated potassium channel complex		0.0102484	1.87869	DPP6
Q80TR4	Q80TR4	Slit1	Slit1	Slit homolog 1 protein	0.811545	-0.0113545	-1.74735	-0.873011	-0.301954	-0.799296	-1.67651	0.676279	1.62745	-0.186046	0.351482	0.319263	-0.59387	0.47993	1.73187	0.191571	Cluster -359	anatomical structure development;anatomical structure morphogenesis;axon extension;axon extension involved in axon guidance;axon guidance;axonogenesis;biological regulation;cell growth;cell migration;cell motility;cell projection morphogenesis;cell projection organization;cellular anatomical entity morphogenesis;cellular component organization;cellular component organization or biogenesis;cellula…	binding;calcium ion binding;carbohydrate derivative binding;cation binding;glycosaminoglycan binding;heparan sulfate proteoglycan binding;heparin binding;ion binding;metal ion binding;protein binding;proteoglycan binding;Roundabout binding;signaling receptor binding;sulfur compound binding	cellular anatomical entity;extracellular space;membrane;plasma membrane	Axon guidance	0.0453822	2.03567
Q00493	Q00493	Cpe	Cpe	Carboxypeptidase E	1.14523	0.299794	-1.80612	-1.08536	-0.889712	-0.889751	-1.1677	0.479573	1.13406	0.115502	0.919528	1.06999	-0.364002	1.14712	0.73258	-0.84073	Cluster -359	amide metabolic process;amide transport;anatomical structure morphogenesis;biological regulation;cardiac chamber morphogenesis;cardiac left ventricle morphogenesis;cardiac ventricle morphogenesis;catabolic process;cell surface receptor signaling pathway;cellular catabolic process;cellular localization;cellular macromolecule localization;cellular metabolic process;cellular process;developmental pr…	binding;carboxypeptidase activity;catalytic activity;catalytic activity, acting on a protein;cation binding;cell adhesion molecule binding;cobalt ion binding;exopeptidase activity;hydrolase activity;ion binding;metal ion binding;metallocarboxypeptidase activity;metalloexopeptidase activity;metallopeptidase activity;neurexin family protein binding;peptidase activity;protein binding;protein domain …	bounding membrane of organelle;cell body;cell projection;cellular anatomical entity;cytoplasmic vesicle;cytoplasmic vesicle membrane;dendrite;dense core granule;extracellular region;extracellular space;Golgi apparatus;intracellular membrane-bounded organelle;intracellular organelle;intracellular vesicle;membrane;membrane-bounded organelle;neuron projection;neuronal cell body;organelle;organelle m…	Type I diabetes mellitus	0.0458714	1.6099
Q6KAR6	Q6KAR6	Exoc3	Exoc3	Exocyst complex component 3	-0.716832	-0.728786	-1.25928	-0.400625	-0.788307	-0.854743	-0.615561	-0.168073	1.93512	0.752069	0.237568	-0.533061	0.618432	0.416201	2.2829	-0.177023	Cluster -359	cell cycle process;cellular component organization;cellular component organization or biogenesis;cellular localization;cellular macromolecule localization;cellular process;cytokinesis;cytoskeleton-dependent cytokinesis;establishment of localization;establishment of protein localization;exocyst localization;exocytic process;exocytosis;export from cell;localization;macromolecule localization;membra…	binding;protein binding;SNARE binding	bounding membrane of organelle;cellular anatomical entity;cytoplasmic vesicle membrane;exocyst;Golgi apparatus;growth cone;intracellular membrane-bounded organelle;intracellular organelle;membrane;membrane-bounded organelle;midbody;organelle;organelle membrane;perinuclear region of cytoplasm;plasma membrane region;presynaptic membrane;protein-containing complex;secretory granule membrane;site of …	Tight junction	0.00188296	2.43618	EXOC3
P03995;Q6NXH9;Q9DCV7;Q9Z2T6	P03995	Gfap;Krt7;Krt73;Krt85	Gfap	Glial fibrillary acidic protein	-1.80556	-0.518649	-0.157982	-1.25975	-0.0505557	0.289671	-1.21755	-0.821975	1.25726	1.01286	0.473254	0.240416	1.23481	-0.652513	0.346731	1.62954	Cluster -359	amino acid import across plasma membrane;amino acid transmembrane transport;amino acid transport;anatomical structure development;aspartate transmembrane transport;astrocyte development;astrocyte differentiation;Bergmann glial cell differentiation;biological regulation;biosynthetic process;C4-dicarboxylate transport;carboxylic acid transmembrane transport;carboxylic acid transport;cell developmen…	binding;cell adhesion molecule binding;enzyme binding;identical protein binding;integrin binding;kinase binding;protein binding;protein-containing complex binding;signaling receptor binding;structural constituent of cytoskeleton;structural molecule activity	astrocyte end-foot;astrocyte projection;cell body;cell projection;cellular anatomical entity;cytoplasm;cytoplasmic side of lysosomal membrane;cytoplasmic side of membrane;cytoskeleton;glial cell projection;intermediate filament;intermediate filament cytoskeleton;intracellular non-membrane-bounded organelle;intracellular organelle;membrane;myelin sheath;non-membrane-bounded organelle;organelle;pla…		0.00183047	3.44518	GFAP
Q8K209	Q8K209	Adgrg1	Adgrg1	Adhesion G-protein coupled receptor G1	-1.1963	0.220957	-1.11771	-0.885055	-0.843627	-0.608204	-1.54112	1.79037	0.749127	0.0812529	0.611796	0.936144	0.0341808	1.67128	0.370829	-0.273924	Cluster -359	adenylate cyclase-activating G protein-coupled receptor signaling pathway;adenylate cyclase-modulating G protein-coupled receptor signaling pathway;anatomical structure development;anatomical structure formation involved in morphogenesis;angiogenesis;animal organ development;biological regulation;biosynthetic process;brain development;cell adhesion;cell migration;cell motility;cell population pro…	binding;carbohydrate derivative binding;collagen binding;extracellular matrix binding;G protein-coupled receptor activity;glycosaminoglycan binding;heparin binding;molecular transducer activity;protein-containing complex binding;signaling receptor activity;sulfur compound binding;transmembrane signaling receptor activity	astrocyte end-foot;astrocyte projection;cell projection;cellular anatomical entity;extracellular region;glial cell projection;glial limiting end-foot;membrane;membrane microdomain;membrane raft;plasma membrane;plasma membrane bounded cell projection		0.0309363	2.07172
Q6Y7W8	Q6Y7W8	Gigyf2	Gigyf2	GRB10-interacting GYF protein 2	-0.610339	-1.37241	-0.154167	-0.540978	-0.324132	0.942373	-1.65518	-0.742207	1.42641	1.63964	0.822057	-0.103121	1.41038	-0.783281	-0.233164	0.278122	Cluster -359	adult behavior;adult locomotory behavior;anatomical structure homeostasis;behavior;biological regulation;biosynthetic process;cell cycle checkpoint signaling;cell cycle process;cell differentiation;cell differentiation in spinal cord;cell surface receptor signaling pathway;cellular biosynthetic process;cellular component disassembly;cellular component organization;cellular component organization …	binding;molecular adaptor activity;proline-rich region binding;protein binding	cell projection;cellular anatomical entity;cytoplasm;cytoplasmic ribonucleoprotein granule;cytoplasmic stress granule;cytoplasmic vesicle;cytosol;dendrite;endoplasmic reticulum;endosome;Golgi apparatus;intracellular membrane-bounded organelle;intracellular non-membrane-bounded organelle;intracellular organelle;intracellular vesicle;membrane;membrane-bounded organelle;neuron projection;non-membran…		0.0196942	1.7841	GIGYF2
Q810U5	Q810U5	Ccdc50	Ccdc50	Coiled-coil domain-containing protein 50	0.648272	-0.530482	-1.29595	-1.17944	-1.21781	-1.02878	0.531764	0.129609	1.65979	0.187992	1.68008	0.509538	-0.267534	0.761129	0.625229	-1.21341	Cluster -359	multicellular organismal process;nervous system process;sensory perception;sensory perception of mechanical stimulus;sensory perception of sound;system process	binding;enzyme binding;protein binding;ubiquitin protein ligase binding;ubiquitin-like protein ligase binding	cellular anatomical entity;cytoplasm;cytoskeleton;cytosol;intracellular non-membrane-bounded organelle;intracellular organelle;microtubule cytoskeleton;non-membrane-bounded organelle;organelle		0.0440418	2.66737
Q3TEA8	Q3TEA8	Hp1bp3	Hp1bp3	Heterochromatin protein 1-binding protein 3	1.64488	-0.743389	1.66548	0.109206	-0.290631	1.09	-0.260326	1.14026	0.192887	-0.409079	-0.143514	0.0585952	-2.08635	-0.221716	-1.15604	-0.590269	Cluster -360	biological regulation;cellular component assembly;cellular component organization;cellular component organization or biogenesis;cellular process;cellular response to chemical stimulus;cellular response to decreased oxygen levels;cellular response to hypoxia;cellular response to oxygen levels;cellular response to stimulus;cellular response to stress;chromatin organization;chromatin remodeling;hete…	binding;chromatin binding;DNA binding;nucleic acid binding;nucleosome binding;organic cyclic compound binding;protein-containing complex binding;structural constituent of chromatin;structural molecule activity	cellular anatomical entity;chromosome;intracellular membrane-bounded organelle;intracellular non-membrane-bounded organelle;intracellular organelle;membrane-bounded organelle;non-membrane-bounded organelle;nuclear body;nuclear speck;nucleosome;nucleus;organelle;protein-containing complex;protein-DNA complex		0.0233788	-1.19143
Q3TWW8;Q8VE97	Q3TWW8	Srsf4;Srsf6	Srsf4	Serine/arginine-rich splicing factor 6	0.73206	0.1167	1.29172	0.739769	0.814451	-0.0793095	0.318632	0.512359	0.557982	-1.25871	0.328385	-2.09945	-1.11929	0.135981	0.73464	-1.72591	Cluster -360	alternative mRNA splicing, via spliceosome;biological regulation;cellular aromatic compound metabolic process;cellular component assembly;cellular component organization;cellular component organization or biogenesis;cellular metabolic process;cellular nitrogen compound metabolic process;cellular process;heterocycle metabolic process;macromolecule metabolic process;metabolic process;mRNA metabolic…	binding;mRNA binding;nucleic acid binding;organic cyclic compound binding;pre-mRNA binding;RNA binding	cellular anatomical entity;cytoplasm;intracellular membrane-bounded organelle;intracellular organelle;membrane-bounded organelle;nuclear body;nuclear speck;nucleus;organelle;protein-containing complex;ribonucleoprotein complex	Spliceosome	0.0200585	-2.49132
P63158	P63158	Hmgb1	Hmgb1	High mobility group protein B1	0.968771	0.177394	1.70978	0.0586689	-0.461837	1.23313	0.9098	-0.626773	-0.821716	-0.0535553	1.07262	-1.9055	-1.30712	-0.152845	0.163781	-0.964601	Cluster -360	activation of immune response;activation of innate immune response;alpha-beta T cell activation;alpha-beta T cell activation involved in immune response;alpha-beta T cell differentiation;alpha-beta T cell differentiation involved in immune response;ameboidal-type cell migration;anatomical structure development;animal organ development;apoptotic cell clearance;aromatic compound biosynthetic proces…	5S rRNA binding;amide binding;bent DNA binding;binding;bubble DNA binding;calcium-dependent protein kinase regulator activity;carbohydrate derivative binding;catalytic activity;cell adhesion molecule binding;chemokine binding;crossed form four-way junction DNA binding;C-X-C chemokine binding;cytokine activity;cytokine binding;damaged DNA binding;DNA binding;DNA binding, bending;DNA polymerase bin…	alphav-beta3 integrin-HMGB1 complex;cell projection;cell surface;cellular anatomical entity;chromosome;condensed chromosome;cytoplasm;cytoplasmic vesicle;cytosol;early endosome;endoplasmic reticulum;endoplasmic reticulum-Golgi intermediate compartment;endosome;extracellular region;extracellular space;intracellular membrane-bounded organelle;intracellular non-membrane-bounded organelle;intracellul…	Base excision repair	0.042429	-1.07951
Q04750	Q04750	Top1	Top1	DNA topoisomerase 1	1.2987	-0.0572025	0.421098	0.346471	0.121081	-0.936269	1.54291	1.30893	-0.932476	-1.46846	-0.1632	0.523656	-1.1	0.469148	0.391308	-1.76569	Cluster -360	aromatic compound biosynthetic process;biological regulation;biosynthetic process;cell cycle process;cell division;cellular aromatic compound metabolic process;cellular biosynthetic process;cellular component organization;cellular component organization or biogenesis;cellular metabolic process;cellular nitrogen compound biosynthetic process;cellular nitrogen compound metabolic process;cellular pr…	adenyl nucleotide binding;adenyl ribonucleotide binding;anion binding;ATP binding;binding;carbohydrate derivative binding;catalytic activity;catalytic activity, acting on a nucleic acid;catalytic activity, acting on a protein;catalytic activity, acting on DNA;chromatin binding;chromatin DNA binding;cis-regulatory region sequence-specific DNA binding;DNA binding;DNA binding, bending;DNA topoisomer…	cellular anatomical entity;chromosome;cytoplasm;cytoplasmic ribonucleoprotein granule;dense fibrillar component;fibrillar center;germ cell nucleus;intracellular membrane-bounded organelle;intracellular non-membrane-bounded organelle;intracellular organelle;male germ cell nucleus;membrane-bounded organelle;non-membrane-bounded organelle;nuclear chromosome;nucleolus;nucleoplasm;nucleus;organelle;P-…		0.0379432	-1.78761
Q8BYA0	Q8BYA0	Tbcd	Tbcd	Tubulin-specific chaperone D	1.29746	1.91756	-0.665391	-0.460327	0.88156	-0.455274	1.19108	0.384562	-0.560032	-0.929651	-1.18508	-0.308958	-0.721786	0.360596	0.815693	-1.562	Cluster -360	adherens junction assembly;adherens junction organization;anatomical structure morphogenesis;bicellular tight junction assembly;biological regulation;cell cycle;cell junction assembly;cell junction organization;cell morphogenesis;cell morphogenesis involved in neuron differentiation;cell-cell junction assembly;cell-cell junction organization;cellular component assembly;cellular component organiza…	beta-tubulin binding;binding;cytoskeletal protein binding;enzyme activator activity;enzyme regulator activity;GTPase activator activity;GTPase regulator activity;molecular function activator activity;molecular function regulator activity;nucleoside-triphosphatase regulator activity;protein binding;tubulin binding	adherens junction;anchoring junction;bicellular tight junction;cell junction;cell-cell junction;cellular anatomical entity;centrosome;cytoplasm;lateral plasma membrane;microtubule organizing center;tight junction		0.0354593	-0.791862
Q9JIK5	Q9JIK5	Ddx21	Ddx21	Nucleolar RNA helicase 2	-0.096122	0.574428	1.45726	0.869297	1.69079	-1.47414	1.22458	-0.339759	-0.755025	-0.212796	-0.861236	-1.02221	0.0814227	-1.50793	-0.251965	0.62341	Cluster -360	aromatic compound biosynthetic process;biological process involved in interspecies interaction between organisms;biological regulation;biosynthetic process;cellular aromatic compound metabolic process;cellular biosynthetic process;cellular component organization;cellular component organization or biogenesis;cellular metabolic process;cellular nitrogen compound biosynthetic process;cellular nitrog…	7SK snRNA binding;adenyl nucleotide binding;adenyl ribonucleotide binding;anion binding;ATP binding;ATP hydrolysis activity;ATP-dependent activity;ATP-dependent activity, acting on RNA;binding;carbohydrate derivative binding;catalytic activity;catalytic activity, acting on a nucleic acid;catalytic activity, acting on RNA;double-stranded RNA binding;helicase activity;heterocyclic compound binding;…	ATPase complex;B-WICH complex;catalytic complex;cellular anatomical entity;chromosome;cytosol;intracellular membrane-bounded organelle;intracellular non-membrane-bounded organelle;intracellular organelle;membrane-bounded organelle;mitochondrion;non-membrane-bounded organelle;nuclear protein-containing complex;nucleolus;nucleoplasm;nucleus;organelle;protein-containing complex;SWI/SNF superfamily-t…		0.0463717	-1.94432
Q8VDM6	Q8VDM6	Hnrnpul1	Hnrnpul1	Heterogeneous nuclear ribonucleoprotein U-like protein 1	0.149367	0.542197	2.05828	1.18354	1.16859	-0.984277	0.621144	-0.172846	-0.54061	0.0754933	-0.609365	-0.868508	0.616126	-1.61237	-1.34733	-0.279438	Cluster -360		binding;enzyme binding;nucleic acid binding;organic cyclic compound binding;protein binding;RNA binding	cell junction;cellular anatomical entity;intracellular membrane-bounded organelle;intracellular organelle;membrane-bounded organelle;nucleoplasm;nucleus;organelle;protein-containing complex;ribonucleoprotein complex;synapse		0.0162588	-1.38971
Q99PF4	Q99PF4	Cdh23	Cdh23	Cadherin-23	1.5761	-0.437868	1.77082	-0.650906	1.21164	-0.565208	1.58686	-0.594023	0.396348	-0.453599	-0.593217	-0.588439	0.168695	-0.648302	-1.42305	-0.755853	Cluster -360	anatomical structure development;anatomical structure morphogenesis;auditory receptor cell stereocilium organization;behavior;calcium ion homeostasis;calcium ion transport;calcium-dependent cell-cell adhesion via plasma membrane cell adhesion molecules;cell adhesion;cell differentiation;cell projection organization;cell-cell adhesion;cell-cell adhesion via plasma-membrane adhesion molecules;cellu…	binding;cadherin binding;calcium ion binding;cation binding;cell adhesion molecule binding;ion binding;metal ion binding;protein binding	9+2 non-motile cilium;actin-based cell projection;apical part of cell;catenin complex;cell junction;cell projection;cellular anatomical entity;centrosome;cilium;cochlear hair cell ribbon synapse;kinocilium;membrane;membrane protein complex;membrane-bounded organelle;microtubule organizing center;neuron projection;non-motile cilium;organelle;photoreceptor inner segment;photoreceptor ribbon synapse…		0.0469543	-2.56052
Q3U7R1	Q3U7R1	Esyt1	Esyt1	Extended synaptotagmin-1	-0.50287	0.601004	1.87442	1.79834	1.45315	0.275883	-0.398306	-0.96839	-0.665293	-0.235089	-0.736132	-0.300544	-0.0315128	-1.21561	-1.27924	0.33019	Cluster -360	cellular component organization;cellular component organization or biogenesis;cellular process;endoplasmic reticulum localization;endoplasmic reticulum-plasma membrane tethering;establishment of localization;intermembrane lipid transfer;lipid transport;localization;membrane docking;membrane organization;organelle localization;organelle localization by membrane tethering;organic substance transpor…	binding;calcium ion binding;calcium-dependent phospholipid binding;cation binding;identical protein binding;ion binding;lipid binding;lipid transfer activity;lipid transporter activity;metal ion binding;phosphatidylcholine binding;phosphatidylethanolamine binding;phosphatidylinositol binding;phospholipid binding;phospholipid transfer activity;phospholipid transporter activity;protein binding;tran…	cellular anatomical entity;endoplasmic reticulum;endoplasmic reticulum membrane;extrinsic component of cytoplasmic side of plasma membrane;extrinsic component of membrane;extrinsic component of plasma membrane;intracellular membrane-bounded organelle;intracellular organelle;membrane;membrane-bounded organelle;organelle;organelle membrane		0.0332772	-0.873385
O88477;Q9CPN8	O88477	Igf2bp1;Igf2bp3	Igf2bp1	Insulin-like growth factor 2 mRNA-binding protein 1	-0.377592	1.13669	1.66174	1.26065	1.27375	-0.0551732	-0.38607	-0.248633	-0.881242	-0.38661	-1.12733	-1.45828	-1.1635	-0.653573	0.323933	1.08124	Cluster -360	anatomical structure development;anatomical structure morphogenesis;biological regulation;cell population proliferation;cell projection morphogenesis;cell projection organization;cell proliferation in forebrain;cellular anatomical entity morphogenesis;cellular component organization;cellular component organization or biogenesis;cellular process;CRD-mediated mRNA stabilization;dendrite arborizatio…	binding;molecular adaptor activity;mRNA 3'-UTR binding;mRNA 5'-UTR binding;mRNA binding;N6-methyladenosine-containing RNA reader activity;nucleic acid binding;organic cyclic compound binding;protein-macromolecule adaptor activity;protein-RNA adaptor activity;RNA binding;translation regulator activity	actin-based cell projection;axon;cell body;cell projection;cellular anatomical entity;CRD-mediated mRNA stability complex;cytoplasm;cytoplasmic ribonucleoprotein granule;cytoplasmic stress granule;cytosol;dendrite;dendritic spine;filopodium;growth cone;intracellular membrane-bounded organelle;intracellular non-membrane-bounded organelle;intracellular organelle;intracellular protein-containing com…		0.0270734	-1.53115
Q9CPN8	Q9CPN8	Igf2bp3	Igf2bp3	Insulin-like growth factor 2 mRNA-binding protein 3	-1.37906	1.05217	1.75968	1.143	1.20628	0.523007	0.558475	-0.633876	-0.229723	-0.50534	-1.40624	-0.669014	-0.580793	-1.37855	0.149409	0.39058	Cluster -360	anatomical structure development;biological regulation;CRD-mediated mRNA stabilization;developmental process;establishment of localization;establishment of RNA localization;localization;mRNA stabilization;mRNA transport;negative regulation of biological process;negative regulation of catabolic process;negative regulation of cellular catabolic process;negative regulation of cellular metabolic proc…	binding;molecular adaptor activity;mRNA 3'-UTR binding;mRNA 5'-UTR binding;mRNA binding;N6-methyladenosine-containing RNA reader activity;nucleic acid binding;organic cyclic compound binding;protein-macromolecule adaptor activity;protein-RNA adaptor activity;RNA binding	cellular anatomical entity;cytoplasm;cytoplasmic ribonucleoprotein granule;cytoplasmic stress granule;cytosol;intracellular membrane-bounded organelle;intracellular non-membrane-bounded organelle;intracellular organelle;membrane-bounded organelle;non-membrane-bounded organelle;nucleus;organelle;P-body;ribonucleoprotein granule;supramolecular complex		0.0286534	-1.30209
Q9CQS8	Q9CQS8	Sec61b	Sec61b	Protein transport protein Sec61 subunit beta	0.130734	0.766692	1.6493	0.49001	1.43295	-0.205394	-0.268107	0.181837	-1.10634	0.741617	-2.37741	-0.825487	-0.356031	-0.655427	-0.294467	0.695526	Cluster -360	catabolic process;cellular localization;cellular macromolecule localization;cellular process;cellular response to stimulus;cellular response to stress;endoplasmic reticulum to cytosol transport;ERAD pathway;establishment of localization;establishment of localization in cell;establishment of protein localization;intracellular protein transmembrane transport;intracellular protein transport;intracel…	binding;epidermal growth factor binding;growth factor binding;hormone binding;protein binding;protein-containing complex binding;ribonucleoprotein complex binding;ribosome binding	cellular anatomical entity;endoplasmic reticulum;endoplasmic reticulum membrane;endoplasmic reticulum protein-containing complex;endoplasmic reticulum quality control compartment;intracellular membrane-bounded organelle;intracellular organelle;membrane;membrane protein complex;membrane-bounded organelle;organelle;organelle membrane;protein-containing complex;Sec61 translocon complex;translocon co…	Phagosome;Protein export;Protein processing in endoplasmic reticulum;Vibrio cholerae infection	0.0310642	-1.10126
P14733;P21619;P48678	P14733	Lmna;Lmnb1;Lmnb2	Lmna	Lamin-B1	0.223173	0.12775	2.64919	0.584977	0.0528348	-0.869284	0.81313	0.650577	-0.895447	-1.48005	-0.523951	0.164813	-1.05126	-1.05934	0.409814	0.203074	Cluster -360	biological regulation;cellular component organization;cellular component organization or biogenesis;cellular localization;cellular macromolecule localization;cellular process;cellular response to acid chemical;cellular response to amino acid stimulus;cellular response to chemical stimulus;cellular response to endogenous stimulus;cellular response to L-glutamate;cellular response to nitrogen compo…	binding;DNA binding;double-stranded DNA binding;enzyme binding;JUN kinase binding;kinase binding;nucleic acid binding;organic cyclic compound binding;phospholipase binding;protein binding;protein kinase binding;sequence-specific DNA binding;sequence-specific double-stranded DNA binding;structural constituent of cytoskeleton;structural molecule activity	cellular anatomical entity;envelope;intermediate filament;intracellular membrane-bounded organelle;intracellular organelle;lamin filament;membrane;membrane-bounded organelle;nuclear envelope;nuclear inner membrane;nuclear lamina;nuclear matrix;nuclear membrane;nuclear periphery;nucleoplasm;nucleus;organelle;organelle envelope;organelle inner membrane;organelle membrane;polymeric cytoskeletal fibe…		0.0285327	-1.21133
Q8K310	Q8K310	Matr3	Matr3	Matrin-3	0.393791	0.236523	2.82695	0.240699	0.639774	-1.27773	0.139269	0.65958	-0.728036	-0.0903881	-0.126172	-0.481646	-1.73264	-0.537474	0.195171	-0.357681	Cluster -360	activation of immune response;activation of innate immune response;anatomical structure development;anatomical structure formation involved in morphogenesis;biological process involved in interspecies interaction between organisms;biological regulation;blastocyst formation;cardiac septum development;defense response;defense response to other organism;developmental process;heart valve development;…	binding;cation binding;identical protein binding;ion binding;metal ion binding;miRNA binding;nucleic acid binding;organic cyclic compound binding;protein binding;regulatory RNA binding;RNA binding;transition metal ion binding;zinc ion binding	cellular anatomical entity;intracellular membrane-bounded organelle;intracellular organelle;membrane-bounded organelle;nuclear matrix;nucleus;organelle		0.0495386	-1.08493
Q9D6Z1	Q9D6Z1	Nop56	Nop56	Nucleolar protein 56	-0.0190039	-0.0278546	1.69066	0.489026	0.958157	1.54373	0.322432	0.478177	-0.757752	0.271807	-1.03254	-1.69104	-1.13342	0.147994	0.279237	-1.51962	Cluster -360	cellular component biogenesis;cellular component organization or biogenesis;cellular process;ribonucleoprotein complex biogenesis;ribosomal small subunit biogenesis	binding;enzyme binding;histone methyltransferase binding;nucleic acid binding;organic cyclic compound binding;protein binding;RNA binding;snoRNA binding	box C/D RNP complex;cellular anatomical entity;cytoplasm;fibrillar center;nucleoplasm;preribosome;pre-snoRNP complex;protein-containing complex;ribonucleoprotein complex;small-subunit processome;sno(s)RNA-containing ribonucleoprotein complex	Ribosome biogenesis in eukaryotes	0.00244867	-2.24456
Q8VE97	Q8VE97	Srsf4	Srsf4	Serine/arginine-rich splicing factor 4	0.610815	-0.138161	1.8802	0.810346	1.115	0.335573	0.657841	0.423857	-1.02392	0.812968	-1.06022	-1.8609	-0.74002	-0.186694	-0.479544	-1.15714	Cluster -360	biological regulation;cell differentiation;cellular aromatic compound metabolic process;cellular developmental process;cellular metabolic process;cellular nitrogen compound metabolic process;cellular process;developmental process;hematopoietic progenitor cell differentiation;heterocycle metabolic process;macromolecule metabolic process;metabolic process;mRNA metabolic process;mRNA processing;nega…	binding;mRNA binding;nucleic acid binding;organic cyclic compound binding;RNA binding;sequence-specific mRNA binding	cellular anatomical entity;cytoplasm;intracellular membrane-bounded organelle;intracellular organelle;membrane-bounded organelle;nuclear body;nuclear speck;nucleus;organelle;protein-containing complex;ribonucleoprotein complex		0.00117195	-1.98783
Q8BTF8	Q8BTF8	Ralyl	Ralyl	RNA-binding Raly-like protein	0.0526236	0.263251	2.41692	0.670722	0.603704	0.0817655	-0.493108	0.595661	-1.24545	-0.056381	-0.197759	-1.72018	1.01959	-0.265633	-0.355023	-1.37071	Cluster -360		binding;identical protein binding;nucleic acid binding;organic cyclic compound binding;protein binding;RNA binding	cellular anatomical entity;intracellular membrane-bounded organelle;intracellular organelle;membrane-bounded organelle;nucleoplasm;nucleus;organelle		0.0304188	-1.35701
Q64012	Q64012	Raly	Raly	RNA-binding protein Raly	-0.231037	0.0778495	2.43261	0.610241	0.772117	0.351658	-0.28277	0.824625	-1.86265	-0.274309	-1.19515	-0.0974932	0.842918	-0.500464	-0.460704	-1.00744	Cluster -360	biological regulation;cellular aromatic compound metabolic process;cellular metabolic process;cellular nitrogen compound metabolic process;cellular process;chemical homeostasis;cholesterol homeostasis;heterocycle metabolic process;homeostatic process;lipid homeostasis;macromolecule metabolic process;metabolic process;mRNA metabolic process;mRNA processing;negative regulation of biological process…	binding;nucleic acid binding;organic cyclic compound binding;RNA binding;transcription coregulator activity;transcription regulator activity	catalytic complex;catalytic step 2 spliceosome;cellular anatomical entity;intracellular membrane-bounded organelle;intracellular organelle;membrane-bounded organelle;nuclear protein-containing complex;nucleus;organelle;protein-containing complex;ribonucleoprotein complex;spliceosomal complex		0.016574	-1.47476
Q6P542	Q6P542	Abcf1	Abcf1	ATP-binding cassette sub-family F member 1	-0.992698	1.29957	0.459083	1.55651	0.923363	0.781254	0.454868	0.326343	-1.98649	-0.289642	-0.67333	-1.3049	0.385044	-1.03353	0.551638	-0.457095	Cluster -360	biological regulation;cellular metabolic process;cellular process;metabolic process;positive regulation of amide metabolic process;positive regulation of biological process;positive regulation of biosynthetic process;positive regulation of cellular biosynthetic process;positive regulation of cellular metabolic process;positive regulation of cellular process;positive regulation of gene expression;…	adenyl nucleotide binding;adenyl ribonucleotide binding;anion binding;ATP binding;ATP hydrolysis activity;binding;carbohydrate derivative binding;catalytic activity;heterocyclic compound binding;hydrolase activity;hydrolase activity, acting on acid anhydrides;hydrolase activity, acting on acid anhydrides, in phosphorus-containing anhydrides;ion binding;nucleic acid binding;nucleoside phosphate bi…	cellular anatomical entity;cytoplasm;cytosol;envelope;intracellular non-membrane-bounded organelle;intracellular organelle;non-membrane-bounded organelle;nuclear envelope;nucleoplasm;organelle;organelle envelope;polysomal ribosome;ribosome		0.0102882	-1.02923
Q8BMA6	Q8BMA6	Srp68	Srp68	Signal recognition particle subunit SRP68	-0.275471	1.20161	1.27065	1.17185	1.32568	0.272645	0.752497	0.388048	-1.54167	0.50867	-1.08577	-1.45917	-0.681088	-0.947509	-0.109333	-0.791642	Cluster -360	cellular localization;cellular macromolecule localization;cellular process;cotranslational protein targeting to membrane;establishment of localization;establishment of protein localization;establishment of protein localization to endoplasmic reticulum;establishment of protein localization to membrane;establishment of protein localization to organelle;localization;localization within membrane;macr…	7S RNA binding;amide binding;binding;endoplasmic reticulum signal peptide binding;nucleic acid binding;organic cyclic compound binding;peptide binding;protein binding;protein domain specific binding;protein-containing complex binding;ribonucleoprotein complex binding;ribosome binding;RNA binding;signal recognition particle binding;signal sequence binding	anchoring junction;cell junction;cell-substrate junction;cellular anatomical entity;cytosol;endoplasmic reticulum;focal adhesion;intracellular membrane-bounded organelle;intracellular non-membrane-bounded organelle;intracellular organelle;membrane-bounded organelle;non-membrane-bounded organelle;nucleolus;organelle;protein-containing complex;ribonucleoprotein complex;signal recognition particle;s…	Protein export	0.000284388	-1.44263
Q91ZW3	Q91ZW3	Smarca5	Smarca5	SWI/SNF-related matrix-associated actin-dependent regulator of chromatin subfamily A member 5	-1.45921	0.565098	2.04539	0.639514	0.727842	1.33305	0.239515	0.46057	-1.02709	-0.128678	-0.605101	-1.25994	0.319178	-1.01121	0.244293	-1.08321	Cluster -360	aromatic compound biosynthetic process;biological regulation;biosynthetic process;cellular aromatic compound metabolic process;cellular biosynthetic process;cellular component assembly;cellular component organization;cellular component organization or biogenesis;cellular metabolic process;cellular nitrogen compound biosynthetic process;cellular nitrogen compound metabolic process;cellular process…	adenyl nucleotide binding;adenyl ribonucleotide binding;anion binding;ATP binding;ATP hydrolysis activity;ATP-dependent activity;ATP-dependent activity, acting on DNA;ATP-dependent chromatin remodeler activity;binding;carbohydrate derivative binding;catalytic activity;catalytic activity, acting on a nucleic acid;catalytic activity, acting on DNA;chromatin binding;DNA binding;helicase activity;het…	ACF complex;ATPase complex;B-WICH complex;catalytic complex;cellular anatomical entity;CHRAC;chromatin;chromatin silencing complex;chromosome;condensed chromosome;fibrillar center;heterochromatin;intracellular membrane-bounded organelle;intracellular non-membrane-bounded organelle;intracellular organelle;ISWI-type complex;membrane-bounded organelle;non-membrane-bounded organelle;NoRC complex;nucl…		0.0166791	-1.78065
P25206	P25206	Mcm3	Mcm3	DNA replication licensing factor MCM3	-0.972918	0.706309	2.17373	0.912565	1.41188	-0.261736	0.472398	-0.318139	-0.851895	0.466896	0.157221	-1.33737	-0.0305144	-1.38134	-0.195094	-0.951997	Cluster -360	cell cycle DNA replication;cell cycle DNA replication initiation;cell cycle process;cellular aromatic compound metabolic process;cellular component organization;cellular component organization or biogenesis;cellular metabolic process;cellular nitrogen compound metabolic process;cellular process;cellular response to stimulus;cellular response to stress;chromosome organization;DNA conformation chan…	adenyl nucleotide binding;adenyl ribonucleotide binding;anion binding;ATP binding;ATP hydrolysis activity;ATP-dependent activity;binding;carbohydrate derivative binding;catalytic activity;catalytic activity, acting on a nucleic acid;DNA binding;helicase activity;heterocyclic compound binding;hydrolase activity;hydrolase activity, acting on acid anhydrides;hydrolase activity, acting on acid anhydr…	cellular anatomical entity;centrosome;CMG complex;cytoplasm;DNA replication preinitiation complex;intracellular membrane-bounded organelle;intracellular organelle;MCM complex;membrane-bounded organelle;microtubule organizing center;nuclear protein-containing complex;nucleoplasm;nucleus;organelle;perinuclear region of cytoplasm;protein-containing complex;protein-DNA complex	Cell cycle;Cell cycle - yeast;DNA replication;Meiosis - yeast	0.0337427	-1.71139
Q6PE01	Q6PE01	Snrnp40	Snrnp40	U5 small nuclear ribonucleoprotein 40 kDa protein	-0.289519	0.445382	2.34425	0.402735	0.225736	0.343631	1.16842	-0.0548155	-0.838968	0.612414	-0.0377392	-1.38976	0.461815	-1.52198	-0.596696	-1.27489	Cluster -360	cellular aromatic compound metabolic process;cellular metabolic process;cellular nitrogen compound metabolic process;cellular process;heterocycle metabolic process;macromolecule metabolic process;metabolic process;mRNA metabolic process;mRNA processing;nitrogen compound metabolic process;nucleic acid metabolic process;nucleobase-containing compound metabolic process;organic cyclic compound metabo…		catalytic complex;catalytic step 2 spliceosome;cellular anatomical entity;cytosol;nuclear body;nuclear protein-containing complex;nuclear speck;protein-containing complex;ribonucleoprotein complex;small nuclear ribonucleoprotein complex;Sm-like protein family complex;spliceosomal complex;spliceosomal snRNP complex;spliceosomal tri-snRNP complex;U2-type catalytic step 2 spliceosome;U2-type spliceo…	Spliceosome	0.0156877	-1.70094
P48758	P48758	Cbr1	Cbr1	Carbonyl reductase [NADPH] 1	0.362782	1.26728	0.745315	1.38003	-0.991773	-0.689543	0.915918	0.885245	-1.20789	0.674058	-0.882343	0.111306	-0.00681246	0.00745162	-0.360487	-2.21053	Cluster -360	biological regulation;cellular ketone metabolic process;cellular metabolic process;cellular process;fat-soluble vitamin metabolic process;glucocorticoid metabolic process;lipid metabolic process;metabolic process;organic cyclic compound metabolic process;organic substance metabolic process;positive regulation of biological process;positive regulation of cellular metabolic process;positive regulat…	15-hydroxyprostaglandin dehydrogenase (NADP+) activity;15-hydroxyprostaglandin-D dehydrogenase (NADP+) activity;alcohol dehydrogenase (NADP+) activity;aldo-keto reductase (NADP) activity;carbonyl reductase (NADPH) activity;catalytic activity;oxidoreductase activity;oxidoreductase activity, acting on CH-OH group of donors;oxidoreductase activity, acting on NAD(P)H;oxidoreductase activity, acting o…	actin-based cell projection;cell projection;cellular anatomical entity;cytoplasm;membrane protein complex;microvillus;plasma membrane bounded cell projection;plasma membrane protein complex;protein-containing complex;subapical complex	Arachidonic acid metabolism	0.0484277	-1.3469
B2RQC6;Q8C196	B2RQC6	Cad;Cps1	Cad	CAD protein	0.99151	1.5994	0.375249	0.542174	-1.74787	0.567612	0.937518	0.732969	-0.328259	-0.0950357	-0.566956	-0.664355	0.391021	-1.10479	0.335742	-1.96593	Cluster -360	alpha-amino acid biosynthetic process;alpha-amino acid metabolic process;amino acid biosynthetic process;amino acid metabolic process;anatomical structure development;animal organ development;animal organ regeneration;aromatic compound biosynthetic process;biological regulation;biosynthetic process;body fluid secretion;carbohydrate derivative biosynthetic process;carbohydrate derivative metabolic…	adenyl nucleotide binding;adenyl ribonucleotide binding;amino acid binding;anion binding;aspartate carbamoyltransferase activity;ATP binding;binding;carbamoyl-phosphate synthase (glutamine-hydrolyzing) activity;carbohydrate derivative binding;carbon-nitrogen ligase activity, with glutamine as amido-N-donor;carboxyl- or carbamoyltransferase activity;carboxylic acid binding;catalytic activity;catal…	cell body;cell projection;cellular anatomical entity;cytoplasm;cytosol;intracellular membrane-bounded organelle;intracellular organelle;membrane-bounded organelle;neuronal cell body;nuclear matrix;nucleus;organelle;presynapse;protein-containing complex;terminal bouton	Alanine, aspartate and glutamate metabolism;Pyrimidine metabolism	0.0406532	-1.08332
Q7TNC4	Q7TNC4	Luc7l2	Luc7l2	Putative RNA-binding protein Luc7-like 2	0.756349	0.909306	1.59497	0.319803	-0.9175	-0.419297	1.73662	0.621881	-0.0782882	-0.312023	-0.675261	-1.64137	-0.328071	-0.903767	0.701928	-1.36529	Cluster -360	cellular component assembly;cellular component organization;cellular component organization or biogenesis;cellular process;mRNA splice site recognition;protein-containing complex assembly;protein-containing complex organization;protein-RNA complex assembly;protein-RNA complex organization	binding;enzyme binding;mRNA binding;nucleic acid binding;organic cyclic compound binding;protein binding;RNA binding	cellular anatomical entity;nuclear body;nuclear protein-containing complex;nuclear speck;prespliceosome;protein-containing complex;ribonucleoprotein complex;small nuclear ribonucleoprotein complex;Sm-like protein family complex;spliceosomal complex;spliceosomal snRNP complex;U1 snRNP;U2-type prespliceosome;U2-type spliceosomal complex		0.0152291	-1.21005
O88351;Q60680	O88351	Chuk;Ikbkb	Chuk	Inhibitor of nuclear factor kappa-B kinase subunit beta	0.597585	1.12482	1.28414	-0.153297	-0.2815	-0.631563	1.46406	1.1511	-0.166876	-1.03465	-0.843554	-0.958071	0.289963	-1.30428	0.976219	-1.5141	Cluster -360	actin cytoskeleton organization;actin filament-based process;B cell homeostasis;biological regulation;canonical NF-kappaB signal transduction;cell projection organization;cell surface receptor signaling pathway;cellular component organization;cellular component organization or biogenesis;cellular localization;cellular macromolecule localization;cellular metabolic process;cellular process;cellular…	adenyl nucleotide binding;adenyl ribonucleotide binding;anion binding;ATP binding;binding;carbohydrate derivative binding;catalytic activity;catalytic activity, acting on a protein;enzyme binding;heterocyclic compound binding;identical protein binding;IkappaB kinase activity;ion binding;kinase activity;kinase binding;nucleoside phosphate binding;nucleotide binding;organic cyclic compound binding;…	catalytic complex;CD40 receptor complex;cellular anatomical entity;cytoplasm;cytoplasmic side of membrane;cytoplasmic side of plasma membrane;cytosol;IkappaB kinase complex;intracellular membrane-bounded organelle;intracellular organelle;membrane;membrane microdomain;membrane protein complex;membrane raft;membrane-bounded organelle;nucleus;organelle;plasma membrane protein complex;plasma membrane…	Acute myeloid leukemia;Adipocytokine signaling pathway;Apoptosis;B cell receptor signaling pathway;Chagas disease (American trypanosomiasis);Chemokine signaling pathway;Chronic myeloid leukemia;Cytosolic DNA-sensing pathway;Epithelial cell signaling in Helicobacter pylori infection;Hepatitis C;Insulin signaling pathway;MAPK signaling pathway;Neurotrophin signaling pathway;NOD-like receptor signal…	0.0165726	-1.4223
P32067	P32067	Ssb	Ssb	Lupus La protein homolog	-0.154017	0.949852	1.28141	0.942927	0.268264	0.564781	1.32399	-1.08561	-0.728488	0.151686	-0.623696	-1.95089	0.573674	-0.879658	0.723997	-1.35821	Cluster -360	aromatic compound catabolic process;biological regulation;catabolic process;cellular aromatic compound metabolic process;cellular catabolic process;cellular localization;cellular macromolecule localization;cellular metabolic process;cellular nitrogen compound catabolic process;cellular nitrogen compound metabolic process;cellular process;establishment of localization;establishment of localization…	binding;DNA binding;mRNA binding;nucleic acid binding;organic cyclic compound binding;poly(U) RNA binding;poly-pyrimidine tract binding;RNA binding;sequence-specific mRNA binding;single-stranded RNA binding;tRNA binding	cellular anatomical entity;cytoplasm;cytoplasmic ribonucleoprotein granule;cytoplasmic stress granule;cytosol;intracellular membrane-bounded organelle;intracellular non-membrane-bounded organelle;intracellular organelle;membrane-bounded organelle;non-membrane-bounded organelle;nucleus;organelle;protein-containing complex;ribonucleoprotein complex;ribonucleoprotein granule;supramolecular complex	Systemic lupus erythematosus	0.0354395	-1.18498
Q7TNV0	Q7TNV0	Dek	Dek	Protein DEK	0.546307	0.588538	1.95979	0.931955	0.620099	0.6386	0.786155	-0.966703	-0.579508	0.197575	-1.40619	-1.53348	0.35418	-0.0413115	-0.678296	-1.41771	Cluster -360	biological regulation;cellular component organization;cellular component organization or biogenesis;cellular process;chromatin organization;chromatin remodeling;positive regulation of biological process;positive regulation of biosynthetic process;positive regulation of cellular biosynthetic process;positive regulation of cellular metabolic process;positive regulation of cellular process;positive …	binding;DNA binding;histone binding;nucleic acid binding;organic cyclic compound binding;protein binding	ATPase complex;B-WICH complex;catalytic complex;cellular anatomical entity;contractile fiber;intracellular membrane-bounded organelle;intracellular non-membrane-bounded organelle;intracellular organelle;membrane-bounded organelle;non-membrane-bounded organelle;nuclear protein-containing complex;nucleolus;nucleoplasm;nucleus;organelle;protein-containing complex;supramolecular complex;supramolecula…		0.00549253	-1.715
Q9R1C7	Q9R1C7	Prpf40a	Prpf40a	Pre-mRNA-processing factor 40 homolog A	1.25971	0.798903	0.889968	1.23207	-0.142734	-0.0916449	1.81575	-1.57943	-1.32297	0.245006	-1.22321	-1.00028	-0.376578	-0.379787	0.0853066	-0.210071	Cluster -360	biological regulation;cell migration;cell motility;cellular aromatic compound metabolic process;cellular component organization;cellular component organization or biogenesis;cellular metabolic process;cellular nitrogen compound metabolic process;cellular process;cytoskeleton organization;heterocycle metabolic process;macromolecule metabolic process;metabolic process;mRNA cis splicing, via spliceo…	binding;nucleic acid binding;organic cyclic compound binding;proline-rich region binding;protein binding;RNA binding	cellular anatomical entity;intracellular membrane-bounded organelle;intracellular organelle;membrane-bounded organelle;nuclear body;nuclear matrix;nuclear protein-containing complex;nuclear speck;nucleus;organelle;prespliceosome;protein-containing complex;ribonucleoprotein complex;small nuclear ribonucleoprotein complex;Sm-like protein family complex;spliceosomal complex;spliceosomal snRNP comple…	Spliceosome	0.0308452	-1.12875
Q3THK7	Q3THK7	Gmps	Gmps	GMP synthase [glutamine-hydrolyzing]	-0.526865	0.768434	1.90284	0.588952	0.82467	-0.0204916	1.87239	-0.0873838	-0.695129	-0.581998	-0.705339	-1.45721	-0.946238	-1.1743	0.454115	-0.216447	Cluster -360	alpha-amino acid metabolic process;amino acid metabolic process;aromatic compound biosynthetic process;biosynthetic process;carbohydrate derivative biosynthetic process;carbohydrate derivative metabolic process;carboxylic acid metabolic process;cellular aromatic compound metabolic process;cellular biosynthetic process;cellular metabolic compound salvage;cellular metabolic process;cellular nitroge…	adenyl nucleotide binding;adenyl ribonucleotide binding;anion binding;ATP binding;binding;carbohydrate derivative binding;carbon-nitrogen ligase activity, with glutamine as amido-N-donor;catalytic activity;GMP synthase (glutamine-hydrolyzing) activity;GMP synthase activity;heterocyclic compound binding;ion binding;ligase activity;ligase activity, forming carbon-nitrogen bonds;nucleoside phosphate…	cellular anatomical entity;cytosol	Drug metabolism - other enzymes;Purine metabolism	0.00327296	-1.80078
Q60668	Q60668	Hnrnpd	Hnrnpd	Heterogeneous nuclear ribonucleoprotein D0	0.772044	0.592419	1.12112	0.51886	0.0430756	-0.520146	1.38345	0.0430756	-0.18111	-2.08172	0.275971	-0.654059	-2.17867	-0.157346	0.806189	0.216854	Cluster -360	3'-UTR-mediated mRNA destabilization;anatomical structure development;animal organ development;aromatic compound biosynthetic process;biological regulation;biosynthetic process;cell dedifferentiation;cellular aromatic compound metabolic process;cellular biosynthetic process;cellular developmental process;cellular metabolic process;cellular nitrogen compound biosynthetic process;cellular nitrogen …	binding;chromatin binding;DNA binding;DNA secondary structure binding;enzyme binding;histone deacetylase binding;minor groove of adenine-thymine-rich DNA binding;mRNA 3'-UTR AU-rich region binding;mRNA 3'-UTR binding;mRNA binding;nucleic acid binding;organic cyclic compound binding;protein binding;protein-containing complex binding;RNA binding;sequence-specific DNA binding;telomeric DNA binding	cell junction;cellular anatomical entity;cytosol;glutamatergic synapse;mCRD-mediated mRNA stability complex;nucleoplasm;organelle;postsynaptic density;postsynaptic specialization;protein-containing complex;ribonucleoprotein complex;synapse		0.0433522	-1.81882	HNRNPD
Q99MR6	Q99MR6	Srrt	Srrt	Serrate RNA effector molecule homolog	0.0301583	0.795785	2.10317	1.08423	0.107107	-1.11451	1.09666	-0.029457	-0.425676	0.806569	-0.632078	-1.463	-0.466206	-1.58712	0.125708	-0.431344	Cluster -360	biological regulation;cellular aromatic compound metabolic process;cellular metabolic process;cellular nitrogen compound metabolic process;cellular process;developmental process;heterocycle metabolic process;macromolecule metabolic process;maintenance of cell number;metabolic process;miRNA processing;mRNA metabolic process;mRNA processing;multicellular organismal process;ncRNA metabolic process;n…	binding;DNA binding;molecular adaptor activity;mRNA cap binding complex binding;nucleic acid binding;organic cyclic compound binding;protein-containing complex binding;protein-macromolecule adaptor activity	cellular anatomical entity;cytoplasm;nuclear body;nucleoplasm;protein-containing complex;ribonucleoprotein complex		0.0364305	-1.47871
Q921F4	Q921F4	Hnrnpll	Hnrnpll	Heterogeneous nuclear ribonucleoprotein L-like	0.0011794	0.824053	1.90663	0.675129	0.247374	-0.787423	1.02955	0.269341	-1.16243	0.304118	-0.921783	-1.57188	0.572558	-0.900888	0.851454	-1.33699	Cluster -360	biological regulation;cellular aromatic compound metabolic process;cellular metabolic process;cellular nitrogen compound metabolic process;cellular process;heterocycle metabolic process;macromolecule metabolic process;metabolic process;mRNA metabolic process;mRNA processing;nitrogen compound metabolic process;nucleic acid metabolic process;nucleobase-containing compound metabolic process;organic …	binding;mRNA binding;nucleic acid binding;organic cyclic compound binding;RNA binding	cell junction;cellular anatomical entity;intracellular membrane-bounded organelle;intracellular organelle;membrane-bounded organelle;nucleus;organelle;protein-containing complex;ribonucleoprotein complex;synapse		0.0316548	-1.7649
Q8VEE4	Q8VEE4	Rpa1	Rpa1	Replication protein A 70 kDa DNA-binding subunit	0.360465	0.543335	1.77411	0.899659	0.0749353	-1.01446	1.48134	0.152278	-1.45898	-0.0315088	-1.6287	-1.29194	0.348729	-0.433294	0.650463	-0.426445	Cluster -360	anatomical structure development;anatomical structure homeostasis;aromatic compound biosynthetic process;base-excision repair;biological regulation;biosynthetic process;cell cycle;cell development;cellular aromatic compound metabolic process;cellular biosynthetic process;cellular component organization;cellular component organization or biogenesis;cellular developmental process;cellular localizat…	binding;cation binding;chromatin binding;damaged DNA binding;DNA binding;G-rich strand telomeric DNA binding;ion binding;metal ion binding;nucleic acid binding;organic cyclic compound binding;protein-containing complex binding;sequence-specific DNA binding;sequence-specific single stranded DNA binding;single-stranded DNA binding;single-stranded telomeric DNA binding;telomeric DNA binding	cellular anatomical entity;chromosome;condensed chromosome;condensed nuclear chromosome;DNA replication factor A complex;germ cell nucleus;intracellular membrane-bounded organelle;intracellular non-membrane-bounded organelle;intracellular organelle;lateral element;male germ cell nucleus;membrane-bounded organelle;non-membrane-bounded organelle;nuclear body;nuclear chromosome;nuclear protein-conta…	DNA replication;Homologous recombination;Mismatch repair;Nucleotide excision repair	0.0268009	-2.05802
Q9Z129	Q9Z129	Recql	Recql	ATP-dependent DNA helicase Q1	-0.0981949	0.906503	1.56811	0.937112	0.481751	-1.14213	1.20829	0.101485	-1.19734	-0.3783	-1.64454	-1.63811	0.69191	-0.284477	0.545007	-0.0570719	Cluster -360	cellular aromatic compound metabolic process;cellular component organization;cellular component organization or biogenesis;cellular metabolic process;cellular nitrogen compound metabolic process;cellular process;cellular response to stimulus;cellular response to stress;chromosome organization;DNA conformation change;DNA damage response;DNA duplex unwinding;DNA geometric change;DNA metabolic proce…	3'-5' DNA helicase activity;adenyl nucleotide binding;adenyl ribonucleotide binding;anion binding;annealing activity;ATP binding;ATP hydrolysis activity;ATP-dependent activity;ATP-dependent activity, acting on DNA;binding;carbohydrate derivative binding;catalytic activity;catalytic activity, acting on a nucleic acid;catalytic activity, acting on DNA;DNA binding;DNA helicase activity;DNA/DNA annea…	cellular anatomical entity;chromosome;cytoplasm;intracellular non-membrane-bounded organelle;intracellular organelle;non-membrane-bounded organelle;nucleoplasm;organelle		0.0427958	-1.53456
Q3UKJ7	Q3UKJ7	Smu1	Smu1	WD40 repeat-containing protein SMU1	0.64741	0.63903	1.58391	0.935903	-0.226914	-0.29632	1.37159	-0.103783	-1.31132	0.86554	-1.55623	-1.45013	0.0339223	-0.821137	0.565066	-0.876538	Cluster -360	biological regulation;cellular aromatic compound metabolic process;cellular metabolic process;cellular nitrogen compound metabolic process;cellular process;heterocycle metabolic process;macromolecule metabolic process;metabolic process;mRNA metabolic process;mRNA processing;mRNA splicing, via spliceosome;nitrogen compound metabolic process;nucleic acid metabolic process;nucleobase-containing comp…		cellular anatomical entity;cytoplasm;intracellular membrane-bounded organelle;intracellular organelle;membrane-bounded organelle;nuclear body;nuclear protein-containing complex;nuclear speck;nucleus;organelle;precatalytic spliceosome;protein-containing complex;ribonucleoprotein complex;spliceosomal complex;U2-type precatalytic spliceosome;U2-type spliceosomal complex		0.0167069	-1.57806
P16254	P16254	Srp14	Srp14	Signal recognition particle 14 kDa protein	0.794318	0.58493	1.63678	0.365658	-0.0322866	-0.176704	1.2863	0.359158	-1.57744	0.254274	-1.40357	-1.94674	-0.141116	-0.240911	0.818476	-0.581126	Cluster -360	cellular localization;cellular macromolecule localization;cellular process;cotranslational protein targeting to membrane;establishment of localization;establishment of protein localization;establishment of protein localization to endoplasmic reticulum;establishment of protein localization to membrane;establishment of protein localization to organelle;localization;localization within membrane;macr…	7S RNA binding;amide binding;binding;endoplasmic reticulum signal peptide binding;nucleic acid binding;organic cyclic compound binding;peptide binding;RNA binding;signal sequence binding	cellular anatomical entity;intracellular membrane-bounded organelle;intracellular organelle;membrane-bounded organelle;nucleus;organelle;protein-containing complex;ribonucleoprotein complex;signal recognition particle;signal recognition particle, endoplasmic reticulum targeting	Protein export	0.0100884	-1.59006
Q9EPU0	Q9EPU0	Upf1	Upf1	Regulator of nonsense transcripts 1	0.829279	0.822711	1.41195	0.927674	1.15207	-0.950806	0.889033	-0.548013	-1.14697	-0.00604069	-1.88146	-1.07222	-1.08263	-0.0850877	0.388145	0.352354	Cluster -360	3'-UTR-mediated mRNA destabilization;aromatic compound catabolic process;biological regulation;catabolic process;cell cycle phase transition;cell cycle process;cellular aromatic compound metabolic process;cellular catabolic process;cellular component organization;cellular component organization or biogenesis;cellular metabolic process;cellular nitrogen compound catabolic process;cellular nitrogen…	adenyl nucleotide binding;adenyl ribonucleotide binding;anion binding;ATP binding;ATP hydrolysis activity;ATP-dependent activity;ATP-dependent activity, acting on DNA;ATP-dependent activity, acting on RNA;binding;carbohydrate derivative binding;catalytic activity;catalytic activity, acting on a nucleic acid;catalytic activity, acting on DNA;catalytic activity, acting on RNA;cation binding;chromat…	cellular anatomical entity;chromatin;chromosomal region;chromosome, telomeric region;cytoplasm;cytoplasmic ribonucleoprotein granule;cytosol;exon-exon junction complex;intracellular membrane-bounded organelle;intracellular non-membrane-bounded organelle;intracellular organelle;membrane-bounded organelle;non-membrane-bounded organelle;nuclear protein-containing complex;nucleoplasm;nucleus;organell…	mRNA surveillance pathway;RNA transport	0.0172181	-1.36042
A0A3B2W820;A0A3B2W824;A0A3B2WBL1;A0A3B2WDD2;Q5XJF6	A0A3B2W820	Rpl10a	Rpl10a	Ribosomal protein L10A	1.09155	0.737548	0.579621	1.11926	1.12915	-1.26528	1.27169	-0.785164	-0.839988	0.0346107	-1.67047	-1.34118	-0.176894	-0.823854	0.713595	0.225806	Cluster -360					0.0482181	-1.3951
Q921K2	Q921K2	Parp1	Parp1	Poly [ADP-ribose] polymerase	0.642721	0.904731	1.85849	0.373799	0.509142	-0.824449	1.32019	-0.259542	-0.672912	0.180883	-1.57066	-1.47027	-1.20818	-0.536565	0.750768	0.00185815	Cluster -360	apoptotic process;ATP generation from poly-ADP-D-ribose;ATP metabolic process;biological process involved in interspecies interaction between organisms;biological regulation;biosynthetic process;carbohydrate biosynthetic process;carbohydrate derivative metabolic process;carbohydrate metabolic process;cell death;cell surface receptor signaling pathway;cellular aromatic compound metabolic process;c…	adenyl nucleotide binding;binding;catalytic activity;catalytic activity, acting on a protein;cation binding;chromatin binding;damaged DNA binding;DNA binding;DNA-binding transcription factor binding;enzyme binding;glycosyltransferase activity;heterocyclic compound binding;histone deacetylase binding;identical protein binding;ion binding;kinase binding;metal ion binding;NAD binding;NAD DNA ADP-rib…	cellular anatomical entity;chromatin;cytosol;envelope;intracellular membrane-bounded organelle;intracellular non-membrane-bounded organelle;intracellular organelle;membrane-bounded organelle;mitochondrion;non-membrane-bounded organelle;nuclear body;nuclear envelope;nuclear replication fork;nucleolus;organelle;organelle envelope;protein-containing complex;protein-DNA complex;replication fork;site …	Base excision repair	0.0174894	-1.43901
Q8VEK3	Q8VEK3	Hnrnpu	Hnrnpu	Heterogeneous nuclear ribonucleoprotein U	0.195703	0.356812	2.14063	0.822878	0.966832	0.339395	0.0832319	0.327625	-0.777935	-1.55222	-0.346042	-0.336164	-2.08075	-0.760813	0.133873	0.48695	Cluster -360	adaptive thermogenesis;anatomical structure development;axo-dendritic transport;biological regulation;cardiac cell development;cardiac muscle cell development;cell cycle;cell development;cell division;cellular aromatic compound metabolic process;cellular component organization;cellular component organization or biogenesis;cellular developmental process;cellular localization;cellular macromolecule…	actin binding;adenyl nucleotide binding;adenyl ribonucleotide binding;anion binding;ATP binding;basal RNA polymerase II transcription machinery binding;basal transcription machinery binding;binding;carbohydrate derivative binding;chromatin binding;chromatin DNA binding;cis-regulatory region sequence-specific DNA binding;cytoskeletal protein binding;DNA binding;double-stranded DNA binding;double-s…	catalytic complex;catalytic step 2 spliceosome;cell surface;cellular anatomical entity;centrosome;chromosome;CRD-mediated mRNA stability complex;cytoplasm;cytoplasmic region;cytoplasmic ribonucleoprotein granule;cytosol;dendrite cytoplasm;inactive sex chromosome;intracellular membrane-bounded organelle;intracellular non-membrane-bounded organelle;intracellular organelle;intracellular protein-cont…	Spliceosome	0.00407435	-1.73383	HNRNPU
Q00PI9	Q00PI9	Hnrnpul2	Hnrnpul2	Heterogeneous nuclear ribonucleoprotein U-like protein 2	0.447967	0.256194	2.19008	0.721265	-0.366063	-0.0744405	0.612297	0.207689	-0.325586	0.829918	-1.31112	-1.85007	0.429838	-1.39302	-0.79051	0.415564	Cluster -360			cell junction;cellular anatomical entity;intracellular membrane-bounded organelle;intracellular organelle;membrane-bounded organelle;nucleoplasm;nucleus;organelle;synapse		0.0408645	-1.04632	HNRNPUL2
Q7TMY8	Q7TMY8	Huwe1	Huwe1	E3 ubiquitin-protein ligase HUWE1	0.345816	0.919603	0.761323	0.425339	-0.339669	2.32048	0.735083	0.024028	-0.815942	-0.638632	-1.52365	-0.537964	-1.65778	0.706769	-0.223949	-0.500858	Cluster -360	base-excision repair;biological regulation;cell differentiation;cellular aromatic compound metabolic process;cellular component organization;cellular component organization or biogenesis;cellular developmental process;cellular metabolic process;cellular nitrogen compound metabolic process;cellular process;cellular response to stimulus;cellular response to stress;circadian regulation of gene expre…	acyltransferase activity;aminoacyltransferase activity;binding;catalytic activity;catalytic activity, acting on a protein;DNA binding;histone modifying activity;histone ubiquitin ligase activity;nucleic acid binding;organic cyclic compound binding;transferase activity;ubiquitin protein ligase activity;ubiquitin-like protein ligase activity;ubiquitin-like protein transferase activity;ubiquitin-pro…	bounding membrane of organelle;cellular anatomical entity;cytoplasm;cytosol;Golgi membrane;intracellular membrane-bounded organelle;intracellular organelle;membrane;membrane-bounded organelle;mitochondrion;nucleoplasm;nucleus;organelle;organelle membrane	Ubiquitin mediated proteolysis	0.00449198	-1.6177	HUWE1
Q501J6	Q501J6	Ddx17	Ddx17	Probable ATP-dependent RNA helicase DDX17	0.448545	1.04578	1.87536	0.753619	0.621686	-1.74477	0.911827	0.161387	-0.696475	-0.517822	-1.01623	-1.62583	-0.65564	-0.309956	0.594195	0.154321	Cluster -360	alternative mRNA splicing, via spliceosome;androgen receptor signaling pathway;aromatic compound biosynthetic process;biological process involved in interspecies interaction between organisms;biological regulation;biosynthetic process;cell differentiation;cellular aromatic compound metabolic process;cellular biosynthetic process;cellular developmental process;cellular metabolic process;cellular n…	adenyl nucleotide binding;adenyl ribonucleotide binding;anion binding;ATP binding;ATP hydrolysis activity;ATP-dependent activity;ATP-dependent activity, acting on RNA;binding;carbohydrate derivative binding;catalytic activity;catalytic activity, acting on a nucleic acid;catalytic activity, acting on RNA;chromatin binding;chromatin DNA binding;DNA binding;helicase activity;heterocyclic compound bi…	cellular anatomical entity;cytoplasm;cytosol;intracellular membrane-bounded organelle;intracellular non-membrane-bounded organelle;intracellular organelle;membrane-bounded organelle;non-membrane-bounded organelle;nuclear body;nuclear speck;nucleolus;nucleus;organelle;protein-containing complex;ribonucleoprotein complex		0.0364151	-1.53965
Q99P31	Q99P31	Hspbp1	Hspbp1	Hsp70-binding protein 1	0.847446	0.223555	1.13986	0.948321	0.333464	-1.61759	1.38725	0.962808	-1.18703	-0.250196	-0.241886	-1.21538	-0.451574	0.481587	0.340759	-1.7014	Cluster -360	biological regulation;positive regulation of biological process;positive regulation of catabolic process;positive regulation of macromolecule metabolic process;positive regulation of metabolic process;positive regulation of nitrogen compound metabolic process;positive regulation of post-translational protein modification;positive regulation of proteasomal protein catabolic process;positive regula…	adenyl nucleotide binding;adenyl-nucleotide exchange factor activity;ATPase regulator activity;binding;enzyme binding;heterocyclic compound binding;molecular function regulator activity;molecular sequestering activity;nucleoside phosphate binding;nucleotide binding;organic cyclic compound binding;protein binding;purine nucleotide binding;small molecule binding;ubiquitin protein ligase binding;ubi…	cellular anatomical entity;endoplasmic reticulum;extracellular space;intracellular membrane-bounded organelle;intracellular organelle;membrane-bounded organelle;organelle	Protein processing in endoplasmic reticulum	0.0288601	-1.17786
P49717	P49717	Mcm4	Mcm4	DNA replication licensing factor MCM4	-0.152844	0.18321	1.99994	0.246967	0.707828	1.44187	0.249233	-0.208862	-2.05087	-0.19409	-1.41754	0.610525	-0.593922	0.296544	-0.0564951	-1.06151	Cluster -360	cell cycle DNA replication;cell cycle DNA replication initiation;cell cycle process;cellular aromatic compound metabolic process;cellular component organization;cellular component organization or biogenesis;cellular metabolic process;cellular nitrogen compound metabolic process;cellular process;cellular response to stimulus;cellular response to stress;chromosome organization;DNA conformation chan…	adenyl nucleotide binding;adenyl ribonucleotide binding;anion binding;ATP binding;ATP hydrolysis activity;ATP-dependent activity;ATP-dependent activity, acting on DNA;binding;carbohydrate derivative binding;catalytic activity;catalytic activity, acting on a nucleic acid;catalytic activity, acting on DNA;DNA binding;DNA helicase activity;helicase activity;heterocyclic compound binding;hydrolase ac…	cellular anatomical entity;CMG complex;DNA replication preinitiation complex;intracellular membrane-bounded organelle;intracellular organelle;MCM complex;membrane-bounded organelle;nuclear protein-containing complex;nucleoplasm;nucleus;organelle;protein-containing complex;protein-DNA complex	Cell cycle;Cell cycle - yeast;DNA replication;Meiosis - yeast	0.0193473	-1.68946	MCM4
Q9Z1X4	Q9Z1X4	Ilf3	Ilf3	Interleukin enhancer-binding factor 3	0.605821	0.710491	1.72938	0.579679	-0.652766	-0.811444	1.48449	0.348516	-1.12089	-0.525968	-1.18755	-0.26733	-0.517846	0.0319707	1.21536	-1.62191	Cluster -360	biological process involved in interspecies interaction between organisms;biological regulation;cellular metabolic process;cellular process;defense response;defense response to other organism;defense response to symbiont;defense response to virus;macromolecule metabolic process;macromolecule modification;metabolic process;negative regulation of amide metabolic process;negative regulation of biolo…	binding;DNA binding;double-stranded RNA binding;enzyme binding;exogenous protein binding;mRNA 3'-UTR AU-rich region binding;mRNA 3'-UTR binding;mRNA binding;nucleic acid binding;organic cyclic compound binding;protein binding;RNA binding;single-stranded RNA binding;virus receptor activity	cellular anatomical entity;cytoplasm;intracellular membrane-bounded organelle;intracellular non-membrane-bounded organelle;intracellular organelle;membrane-bounded organelle;mitochondrion;non-membrane-bounded organelle;nucleolus;nucleoplasm;nucleus;organelle;protein-containing complex;ribonucleoprotein complex		0.0409132	-1.65735
Q9CS84	Q9CS84	Nrxn1	Nrxn1	Neurexin-1	1.1862	-0.3642	-0.502354	-0.898597	-0.946492	-1.3003	-1.79945	0.211132	0.613088	0.867278	0.82589	0.169817	0.685305	1.67848	0.597845	-1.02365	Cluster -359	adult behavior;anterograde trans-synaptic signaling;auditory behavior;behavior;biological process involved in intraspecies interaction between organisms;biological regulation;cell adhesion;cell communication;cell junction assembly;cell junction organization;cell projection organization;cell-cell adhesion;cell-cell adhesion via plasma-membrane adhesion molecules;cell-cell signaling;cellular compon…	acetylcholine receptor binding;binding;calcium channel regulator activity;calcium ion binding;cation binding;cell adhesion molecule binding;channel regulator activity;fibroblast growth factor receptor binding;growth factor receptor binding;ion binding;ion channel regulator activity;metal ion binding;molecular function regulator activity;molecular transducer activity;neuroligin family protein bind…	cell body;cell junction;cell projection;cell surface;cellular anatomical entity;cytoplasmic vesicle;endocytic vesicle;endoplasmic reticulum;GABA-ergic synapse;glutamatergic synapse;intracellular membrane-bounded organelle;intracellular non-membrane-bounded organelle;intracellular organelle;intracellular vesicle;membrane;membrane-bounded organelle;neuronal cell body;non-membrane-bounded organelle;…		0.0211946	1.53728	NRXN1
Q9CX86	Q9CX86	Hnrnpa0	Hnrnpa0	Heterogeneous nuclear ribonucleoprotein A0	0.615744	0.457195	2.47596	0.760263	0.318352	-1.3189	0.0363788	0.896041	-1.25575	-0.514128	-1.31793	-0.0140673	-0.041917	-0.312195	0.339822	-1.12486	Cluster -360	3'-UTR-mediated mRNA stabilization;biological regulation;defense response;inflammatory response;mRNA stabilization;negative regulation of biological process;negative regulation of catabolic process;negative regulation of cellular catabolic process;negative regulation of cellular metabolic process;negative regulation of cellular process;negative regulation of macromolecule metabolic process;negati…	binding;enzyme binding;kinase binding;mRNA 3'-UTR AU-rich region binding;mRNA 3'-UTR binding;mRNA binding;nucleic acid binding;organic cyclic compound binding;protein binding;protein kinase binding;RNA binding	cell junction;cellular anatomical entity;intracellular membrane-bounded organelle;intracellular organelle;membrane-bounded organelle;nucleoplasm;nucleus;organelle;protein-containing complex;ribonucleoprotein complex;synapse		0.0281432	-1.55481
P29341	P29341	Pabpc1	Pabpc1	Polyadenylate-binding protein 1	-0.0751952	0.854514	0.873129	0.740152	1.0187	-0.137271	0.965526	0.359804	-1.20365	-2.26569	-0.820086	-0.229878	-1.55961	-0.000501699	0.755835	0.724219	Cluster -360	aromatic compound catabolic process;biological regulation;catabolic process;cellular aromatic compound metabolic process;cellular catabolic process;cellular metabolic process;cellular nitrogen compound catabolic process;cellular nitrogen compound metabolic process;cellular process;CRD-mediated mRNA stabilization;heterocycle catabolic process;heterocycle metabolic process;macromolecule catabolic p…	binding;mRNA 3'-UTR binding;mRNA binding;nucleic acid binding;organic cyclic compound binding;poly(A) binding;poly(U) RNA binding;poly-purine tract binding;poly-pyrimidine tract binding;RNA binding;single-stranded RNA binding	catalytic complex;catalytic step 2 spliceosome;cell junction;cell leading edge;cell projection;cellular anatomical entity;cytoplasm;cytoplasmic ribonucleoprotein granule;cytoplasmic stress granule;cytosol;dendrite;intracellular membrane-bounded organelle;intracellular non-membrane-bounded organelle;intracellular organelle;lamellipodium;mCRD-mediated mRNA stability complex;membrane-bounded organel…	mRNA surveillance pathway;RNA degradation;RNA transport	0.0153062	-1.66579	PABPC1
Q8BU30	Q8BU30	Iars1	Iars1	Isoleucine--tRNA ligase, cytoplasmic	0.42473	1.15911	0.868491	0.838411	0.907606	-1.362	1.2428	0.292212	-0.764877	-0.177445	-1.42777	-1.03721	-0.466302	0.17814	0.985243	-1.66115	Cluster -360	amino acid activation;amino acid metabolic process;carboxylic acid metabolic process;cellular aromatic compound metabolic process;cellular metabolic process;cellular nitrogen compound metabolic process;cellular process;heterocycle metabolic process;isoleucyl-tRNA aminoacylation;macromolecule metabolic process;metabolic process;ncRNA metabolic process;nitrogen compound metabolic process;nucleic ac…	adenyl nucleotide binding;adenyl ribonucleotide binding;aminoacyl-tRNA editing activity;aminoacyl-tRNA ligase activity;anion binding;ATP binding;binding;carbohydrate derivative binding;carboxylic ester hydrolase activity;catalytic activity;catalytic activity, acting on a nucleic acid;catalytic activity, acting on a tRNA;catalytic activity, acting on RNA;enzyme binding;GTPase binding;heterocyclic …	aminoacyl-tRNA synthetase multienzyme complex;catalytic complex;cellular anatomical entity;cytoplasm;cytosol;intracellular protein-containing complex;nucleoplasm;protein-containing complex	Aminoacyl-tRNA biosynthesis;Valine, leucine and isoleucine biosynthesis	0.0227705	-2.54178
Q3THS6	Q3THS6	Mat2a	Mat2a	S-adenosylmethionine synthase isoform type-2	0.132377	0.940073	1.3349	0.290222	1.18434	-0.97542	1.26302	0.623375	-1.07853	0.243396	-1.56858	-0.71712	-0.355648	-0.0959862	0.576617	-1.79703	Cluster -360	biosynthetic process;cellular biosynthetic process;cellular component assembly;cellular component organization;cellular component organization or biogenesis;cellular metabolic process;cellular process;cellular response to chemical stimulus;cellular response to cytokine stimulus;cellular response to leukemia inhibitory factor;cellular response to organic substance;cellular response to stimulus;cir…	adenyl nucleotide binding;adenyl ribonucleotide binding;amino acid binding;anion binding;ATP binding;binding;carbohydrate derivative binding;carboxylic acid binding;catalytic activity;cation binding;heterocyclic compound binding;identical protein binding;ion binding;metal ion binding;methionine adenosyltransferase activity;nucleoside phosphate binding;nucleotide binding;organic acid binding;organ…	catalytic complex;cellular anatomical entity;cytosol;intracellular protein-containing complex;methionine adenosyltransferase complex;protein-containing complex;transferase complex	Cysteine and methionine metabolism	0.0106069	-1.71717
Q01320;Q64511	Q01320	Top2a;Top2b	Top2a	DNA topoisomerase 2-alpha	1.15321	0.851338	1.37161	0.178353	1.14728	-0.832863	0.622387	0.539647	-0.97511	0.16675	-0.85455	-1.13117	-0.314186	0.0549422	0.29532	-2.27295	Cluster -360	apoptotic chromosome condensation;biological regulation;cell cycle process;cell differentiation;cell division;cellular aromatic compound metabolic process;cellular component organization;cellular component organization or biogenesis;cellular developmental process;cellular metabolic process;cellular nitrogen compound metabolic process;cellular process;cellular process involved in reproduction in m…	adenyl nucleotide binding;adenyl ribonucleotide binding;anion binding;ATP binding;ATP-dependent activity;ATP-dependent activity, acting on DNA;binding;carbohydrate derivative binding;catalytic activity;catalytic activity, acting on a nucleic acid;catalytic activity, acting on DNA;cation binding;chromatin binding;DNA binding;DNA binding, bending;DNA topoisomerase activity;DNA topoisomerase type II…	catalytic complex;cellular anatomical entity;centriole;chromosomal region;chromosome;chromosome, centromeric region;condensed chromosome;cytoplasm;DNA topoisomerase type II (double strand cut, ATP-hydrolyzing) complex;germ cell nucleus;intracellular membrane-bounded organelle;intracellular non-membrane-bounded organelle;intracellular organelle;male germ cell nucleus;membrane-bounded organelle;non…		0.00647093	-1.66578
Q8CCS6	Q8CCS6	Pabpn1	Pabpn1	Polyadenylate-binding protein 2	0.197937	0.748931	2.2082	0.465609	0.749167	-0.827459	0.769354	0.0564319	-0.7346	0.447289	-1.83481	-1.1564	-0.0821891	-0.0625135	0.412216	-1.35717	Cluster -360	biological regulation;cellular aromatic compound metabolic process;cellular localization;cellular metabolic process;cellular nitrogen compound metabolic process;cellular process;cellular response to biotic stimulus;cellular response to chemical stimulus;cellular response to lipid;cellular response to lipopolysaccharide;cellular response to molecule of bacterial origin;cellular response to organic…	binding;enzyme binding;nucleic acid binding;organic cyclic compound binding;poly(A) binding;poly-purine tract binding;protein binding;protein self-association;RNA binding;RNA polymerase binding;single-stranded RNA binding	cellular anatomical entity;cytoplasm;inclusion body;intracellular anatomical structure;intracellular membrane-bounded organelle;intracellular organelle;membrane-bounded organelle;nuclear body;nuclear inclusion body;nuclear speck;nucleus;organelle;protein-containing complex;ribonucleoprotein complex	mRNA surveillance pathway	0.0228918	-1.54813
Q9R190	Q9R190	Mta2	Mta2	Metastasis-associated protein MTA2	0.256473	0.309664	1.70223	0.522392	1.08435	-0.567871	1.54185	-0.519191	-1.77084	0.156935	-1.00884	-0.962315	0.194563	-0.307742	0.705535	-1.33718	Cluster -360	biological regulation;cellular aromatic compound metabolic process;cellular component organization;cellular component organization or biogenesis;cellular metabolic process;cellular nitrogen compound metabolic process;cellular process;chromatin organization;chromatin remodeling;chromosome organization;DNA alkylation;DNA metabolic process;DNA methylation;DNA modification;heterocycle metabolic proce…	binding;catalytic activity;catalytic activity, acting on a protein;cation binding;chromatin binding;deacetylase activity;DNA binding;DNA-binding transcription factor binding;enzyme binding;histone deacetylase activity;histone deacetylase binding;histone modifying activity;hydrolase activity;hydrolase activity, acting on carbon-nitrogen (but not peptide) bonds;hydrolase activity, acting on carbon-…	ATPase complex;catalytic complex;cellular anatomical entity;CHD-type complex;chromosomal region;chromosome, telomeric region;histone deacetylase complex;intracellular membrane-bounded organelle;intracellular organelle;membrane-bounded organelle;nuclear protein-containing complex;nucleoplasm;nucleus;NuRD complex;organelle;protein-containing complex;SWI/SNF superfamily-type complex;transcription re…		0.0243861	-1.66744
P32233	P32233	Drg1	Drg1	Developmentally-regulated GTP-binding protein 1	-0.363595	0.699727	0.79508	0.596982	0.271042	-0.0685842	1.54612	0.528465	-2.07178	0.0819144	-2.19146	-0.0577133	0.785111	0.027881	0.323585	-0.902776	Cluster -360	amide biosynthetic process;amide metabolic process;biological regulation;biosynthetic process;cellular biosynthetic process;cellular metabolic process;cellular nitrogen compound biosynthetic process;cellular nitrogen compound metabolic process;cellular process;cytoplasmic translation;macromolecule biosynthetic process;macromolecule metabolic process;metabolic process;nitrogen compound metabolic p…	alkali metal ion binding;anion binding;binding;carbohydrate derivative binding;catalytic activity;cation binding;cytoskeletal protein binding;GTP binding;GTPase activity;guanyl nucleotide binding;guanyl ribonucleotide binding;heterocyclic compound binding;hydrolase activity;hydrolase activity, acting on acid anhydrides;hydrolase activity, acting on acid anhydrides, in phosphorus-containing anhydr…	cellular anatomical entity;cytoplasm;cytosol;intracellular membrane-bounded organelle;intracellular organelle;membrane-bounded organelle;nuclear body;nucleoplasm;nucleus;organelle;polysome;protein-containing complex;ribonucleoprotein complex		0.0402609	-0.760888
Q8C878	Q8C878	Uba3	Uba3	NEDD8-activating enzyme E1 catalytic subunit	0.226119	0.56176	1.27581	0.91855	0.637079	-1.16803	1.55311	0.0866658	-1.97875	-0.29568	-1.3843	0.200146	0.0209488	0.05113	0.586232	-1.29078	Cluster -360	biological regulation;cell cycle;cellular process;endomitotic cell cycle;macromolecule metabolic process;macromolecule modification;metabolic process;mitotic cell cycle;negative regulation of biological process;negative regulation of biosynthetic process;negative regulation of cellular biosynthetic process;negative regulation of cellular metabolic process;negative regulation of cellular process;n…	adenyl nucleotide binding;adenyl ribonucleotide binding;anion binding;ATP binding;ATP-dependent activity;binding;carbohydrate derivative binding;catalytic activity;catalytic activity, acting on a protein;DNA-binding transcription factor binding;heterocyclic compound binding;identical protein binding;ion binding;ligase activity;ligase activity, forming carbon-sulfur bonds;NEDD8 activating enzyme a…	cellular anatomical entity;cytoplasm;intracellular membrane-bounded organelle;intracellular organelle;membrane-bounded organelle;nucleus;organelle;protein-containing complex	Ubiquitin mediated proteolysis	0.0354678	-1.09951
Q9QZD9	Q9QZD9	Eif3i	Eif3i	Eukaryotic translation initiation factor 3 subunit I	-0.366468	1.06602	0.825843	0.91554	0.825897	-0.946791	2.07023	0.0281747	-1.16527	0.014977	-0.997613	-0.331645	0.402633	-0.826556	0.214053	-1.72902	Cluster -360	cellular component assembly;cellular component organization;cellular component organization or biogenesis;cellular metabolic process;cellular process;cytoplasmic translational initiation;formation of cytoplasmic translation initiation complex;metabolic process;protein-containing complex assembly;protein-containing complex organization;protein-RNA complex assembly;protein-RNA complex organization;…	binding;enzyme binding;nucleic acid binding;organic cyclic compound binding;protein binding;RNA binding;translation factor activity, RNA binding;translation initiation factor activity;translation regulator activity;translation regulator activity, nucleic acid binding	cell junction;cellular anatomical entity;eukaryotic 43S preinitiation complex;eukaryotic 48S preinitiation complex;eukaryotic translation initiation factor 3 complex;eukaryotic translation initiation factor 3 complex, eIF3m;protein-containing complex;ribonucleoprotein complex;synapse;translation preinitiation complex	RNA transport	0.0210377	-1.20928
Q640N1	Q640N1	Aebp1	Aebp1	Adipocyte enhancer-binding protein 1	1.40978	-0.406314	0.277686	0.462725	0.211208	1.32309	-0.36474	1.10215	-1.22014	-0.525958	-1.77966	0.518191	-0.504817	0.212332	0.994323	-1.70985	Cluster -360	amide metabolic process;biological regulation;macromolecule metabolic process;metabolic process;negative regulation of biological process;negative regulation of biosynthetic process;negative regulation of cellular biosynthetic process;negative regulation of cellular metabolic process;negative regulation of cellular process;negative regulation of DNA-templated transcription;negative regulation of …	binding;calmodulin binding;carboxypeptidase activity;catalytic activity;catalytic activity, acting on a protein;cation binding;collagen binding;DNA binding;DNA-binding transcription factor activity;DNA-binding transcription factor activity, RNA polymerase II-specific;DNA-binding transcription repressor activity;DNA-binding transcription repressor activity, RNA polymerase II-specific;double-strand…	cellular anatomical entity;cytoplasm;extracellular space;intracellular membrane-bounded organelle;intracellular organelle;membrane-bounded organelle;nucleus;organelle		0.039659	-2.07053
Q6ZPJ3	Q6ZPJ3	Ube2o	Ube2o	(E3-independent) E2 ubiquitin-conjugating enzyme UBE2O	0.478134	0.496967	0.152818	-0.0866801	0.185835	1.99977	0.379428	0.390867	-0.898219	0.228353	-2.01845	0.559871	-1.30293	0.576677	0.485643	-1.62808	Cluster -360	biological regulation;cellular localization;cellular process;cytosolic transport;endosomal transport;establishment of localization;establishment of localization in cell;intracellular transport;localization;macromolecule metabolic process;macromolecule modification;metabolic process;nitrogen compound metabolic process;organic substance metabolic process;organonitrogen compound metabolic process;po…	acyltransferase activity;adenyl nucleotide binding;adenyl ribonucleotide binding;aminoacyltransferase activity;anion binding;ATP binding;binding;carbohydrate derivative binding;catalytic activity;catalytic activity, acting on a protein;heterocyclic compound binding;ion binding;nucleoside phosphate binding;nucleotide binding;organic cyclic compound binding;purine nucleotide binding;purine ribonucl…	cellular anatomical entity;cytoplasm;cytosol;intracellular membrane-bounded organelle;intracellular organelle;membrane-bounded organelle;nuclear body;nucleoplasm;nucleus;organelle	Ubiquitin mediated proteolysis	0.0407376	-1.38299
Q64514	Q64514	Tpp2	Tpp2	Tripeptidyl-peptidase 2	0.259331	0.322487	-0.124691	-0.210242	0.0786992	1.3798	1.83324	0.566773	-0.936078	0.350803	-1.85417	0.137332	-0.945954	0.143096	0.785308	-1.78574	Cluster -360	catabolic process;cellular homeostasis;chemical homeostasis;homeostatic process;intracellular amino acid homeostasis;intracellular chemical homeostasis;macromolecule catabolic process;macromolecule metabolic process;metabolic process;nitrogen compound metabolic process;organic substance catabolic process;organic substance metabolic process;organonitrogen compound catabolic process;organonitrogen …	amide binding;aminopeptidase activity;binding;catalytic activity;catalytic activity, acting on a protein;endopeptidase activity;exopeptidase activity;hydrolase activity;identical protein binding;peptidase activity;peptide binding;protein binding;serine hydrolase activity;serine-type endopeptidase activity;serine-type exopeptidase activity;serine-type peptidase activity;tripeptidyl-peptidase activ…	cellular anatomical entity;cytosol;endoplasmic reticulum;intracellular membrane-bounded organelle;intracellular organelle;membrane-bounded organelle;nuclear body;nucleoplasm;organelle		0.0347112	-1.81687
P70670	P70670	Naca	Naca	Nascent polypeptide-associated complex subunit alpha, muscle-specific form	0.0929865	0.378465	-0.628059	0.413797	-0.153245	2.20361	1.61985	0.48566	-1.72592	0.0235634	-1.64489	-0.212222	-0.429954	-0.426257	0.473879	-0.471262	Cluster -360	biological regulation;cell migration;cell motility;cellular localization;cellular macromolecule localization;cellular process;establishment of localization;establishment of protein localization;establishment of protein localization to membrane;localization;localization within membrane;macromolecule localization;muscle cell migration;myoblast migration;negative regulation of biological process;neg…	binding;DNA binding;general transcription initiation factor binding;nucleic acid binding;organic cyclic compound binding;protein binding;TBP-class protein binding;transcription coactivator activity;transcription coregulator activity;transcription factor binding;transcription regulator activity;unfolded protein binding	cellular anatomical entity;cytoplasm;intracellular membrane-bounded organelle;intracellular organelle;membrane-bounded organelle;nascent polypeptide-associated complex;nucleus;organelle;protein-containing complex		0.0212302	-1.26244
O54774	O54774	Ap3d1	Ap3d1	AP-3 complex subunit delta-1	0.111233	1.02008	-0.40274	0.87772	0.305424	2.11894	1.12857	-0.0411193	-1.32163	-0.12955	-1.71213	-0.951685	-0.274789	0.158592	0.285021	-1.17194	Cluster -360	anterograde axonal transport;anterograde synaptic vesicle transport;antigen processing and presentation;antigen processing and presentation of exogenous antigen;antigen processing and presentation of lipid antigen via MHC class Ib;antigen processing and presentation via MHC class Ib;antigen processing and presentation, exogenous lipid antigen via MHC class Ib;axo-dendritic transport;axonal transp…		AP-3 adaptor complex;AP-type membrane coat adaptor complex;axon;axon cytoplasm;bounding membrane of organelle;cell junction;cell projection;cellular anatomical entity;cytoplasm;cytoplasmic region;cytoplasmic vesicle;cytoplasmic vesicle membrane;early endosome;endosome;endosome membrane;glutamatergic synapse;Golgi apparatus subcompartment;Golgi membrane;intracellular membrane-bounded organelle;int…	Lysosome	0.00532872	-1.37131
Q05D44	Q05D44	Eif5b	Eif5b	Eukaryotic translation initiation factor 5B	0.0596288	0.718107	0.594378	0.724575	1.08395	1.76543	0.689103	-0.160555	-1.32125	-0.234673	-1.82747	-1.30514	-0.0197649	0.327824	0.24662	-1.34076	Cluster -360	biological regulation;cellular component assembly;cellular component organization;cellular component organization or biogenesis;cellular metabolic process;cellular process;metabolic process;non-membrane-bounded organelle assembly;organelle assembly;organelle organization;post-transcriptional regulation of gene expression;regulation of amide metabolic process;regulation of biological process;regul…	anion binding;binding;carbohydrate derivative binding;catalytic activity;cation binding;GTP binding;GTPase activity;guanyl nucleotide binding;guanyl ribonucleotide binding;heterocyclic compound binding;hydrolase activity;hydrolase activity, acting on acid anhydrides;hydrolase activity, acting on acid anhydrides, in phosphorus-containing anhydrides;ion binding;metal ion binding;nucleic acid bindin…	cell junction;cellular anatomical entity;cytoplasm;synapse	RNA transport	0.00220468	-2.46613
P63330	P63330	Ppp2ca	Ppp2ca	Serine/threonine-protein phosphatase 2A catalytic subunit alpha isoform	0.525536	0.502754	0.872982	0.587119	0.924893	-0.0875018	0.132076	0.776994	-2.0074	-0.199069	-1.98273	0.488927	-1.69684	0.751749	-0.0311729	0.441683	Cluster -360	anatomical structure development;biological regulation;cell cycle;cellular metabolic process;cellular process;dephosphorylation;developmental process;homeostasis of number of cells;homeostatic process;immune system process;leukocyte homeostasis;lymphocyte homeostasis;macromolecule metabolic process;macromolecule modification;meiotic cell cycle;mesoderm development;metabolic process;mitotic cell c…	adrenergic receptor binding;antigen binding;beta-2 adrenergic receptor binding;binding;catalytic activity;catalytic activity, acting on a protein;cation binding;cytoskeletal protein binding;enzyme binding;G protein-coupled receptor binding;GABA receptor binding;hydrolase activity;hydrolase activity, acting on ester bonds;identical protein binding;ion binding;kinase binding;metal ion binding;myosi…	catalytic complex;cell junction;cellular anatomical entity;chromosomal region;chromosome, centromeric region;cytoplasm;cytosol;intracellular membrane-bounded organelle;intracellular organelle;membrane;membrane microdomain;membrane raft;membrane-bounded organelle;nucleus;organelle;phosphatase complex;plasma membrane;presynapse;protein phosphatase type 2A complex;protein serine/threonine phosphatas…	Cell cycle - yeast;Chagas disease (American trypanosomiasis);Hepatitis C;Long-term depression;Meiosis - yeast;mRNA surveillance pathway;Oocyte meiosis;TGF-beta signaling pathway;Tight junction;Wnt signaling pathway	0.0284199	-1.10583	PPP2CA
Q99LD4	Q99LD4	Gps1	Gps1	COP9 signalosome complex subunit 1	0.28215	0.930154	0.934995	0.48389	-0.326341	1.59073	1.73018	0.248016	-1.50511	-0.223143	-1.60889	-0.420301	-0.960895	0.0433193	-0.0841867	-1.11457	Cluster -360			cellular anatomical entity;COP9 signalosome;cytoplasm;cytosol;intracellular membrane-bounded organelle;intracellular organelle;membrane-bounded organelle;nuclear protein-containing complex;nucleoplasm;nucleus;organelle;protein-containing complex		0.000663001	-1.49085
O35864	O35864	Cops5	Cops5	COP9 signalosome complex subunit 5	0.643228	0.72997	0.320116	0.269609	-0.552181	0.906509	1.47728	0.630611	-0.877155	-0.391718	-1.88857	-0.611326	0.552091	0.522375	0.405943	-2.13678	Cluster -360	biological regulation;cellular process;establishment of localization;establishment of localization in cell;establishment of organelle localization;establishment of vesicle localization;exocytosis;exosomal secretion;export from cell;localization;macromolecule metabolic process;metabolic process;negative regulation of apoptotic process;negative regulation of biological process;negative regulation o…	binding;catalytic activity;catalytic activity, acting on a protein;cation binding;cytokine binding;deNEDDylase activity;deubiquitinase activity;enzyme binding;hydrolase activity;ion binding;macrophage migration inhibitory factor binding;metal ion binding;metal-dependent deubiquitinase activity;metallopeptidase activity;peptidase activity;protein binding;transcription coactivator activity;transcri…	cellular anatomical entity;chromatin;COP9 signalosome;cytoplasm;cytoplasmic vesicle;cytosol;exocytic vesicle;intracellular membrane-bounded organelle;intracellular organelle;intracellular vesicle;membrane-bounded organelle;nuclear protein-containing complex;nucleoplasm;nucleus;organelle;perinuclear region of cytoplasm;protein-containing complex;protein-DNA complex;secretory vesicle;synaptic vesic…		0.0207996	-1.18537
O88544	O88544	Cops4	Cops4	COP9 signalosome complex subunit 4	0.43065	0.802113	0.28775	0.215828	0.0167234	0.745532	1.79087	0.547639	-1.2716	-0.629349	-1.93507	-0.220722	0.480004	0.461866	0.198492	-1.92072	Cluster -360	macromolecule metabolic process;macromolecule modification;metabolic process;nitrogen compound metabolic process;organic substance metabolic process;organonitrogen compound metabolic process;post-translational protein modification;primary metabolic process;protein deneddylation;protein metabolic process;protein modification by small protein conjugation or removal;protein modification by small pro…		cell junction;cellular anatomical entity;COP9 signalosome;cytoplasm;cytoplasmic vesicle;exocytic vesicle;intracellular membrane-bounded organelle;intracellular organelle;intracellular vesicle;membrane-bounded organelle;nuclear body;nuclear protein-containing complex;nuclear speck;nucleus;organelle;protein-containing complex;secretory vesicle;synaptic vesicle;transport vesicle;vesicle		0.00971308	-1.5472
Q8R574	Q8R574	Prpsap2	Prpsap2	Phosphoribosyl pyrophosphate synthase-associated protein 2	0.136683	1.07888	0.601207	0.265798	0.121336	-0.623913	1.53887	1.11637	-2.08967	0.385837	-1.10489	-0.727493	-0.886262	0.587053	0.772534	-1.17233	Cluster -360	5-phosphoribose 1-diphosphate biosynthetic process;5-phosphoribose 1-diphosphate metabolic process;anatomical structure development;animal organ development;aromatic compound biosynthetic process;biosynthetic process;bone development;carbohydrate derivative biosynthetic process;carbohydrate derivative metabolic process;cellular aromatic compound metabolic process;cellular biosynthetic process;cel…	adenyl nucleotide binding;adenyl ribonucleotide binding;anion binding;ATP binding;binding;carbohydrate derivative binding;catalytic activity;cation binding;diphosphotransferase activity;heterocyclic compound binding;identical protein binding;ion binding;magnesium ion binding;metal ion binding;nucleoside phosphate binding;nucleotide binding;organic cyclic compound binding;protein binding;purine nu…	catalytic complex;cellular anatomical entity;cytoplasm;protein-containing complex;ribose phosphate diphosphokinase complex;transferase complex;transferase complex, transferring phosphorus-containing groups		0.0284035	-0.92048
Q9D883	Q9D883	U2af1	U2af1	Splicing factor U2AF 35 kDa subunit	0.871272	0.62989	1.27119	0.871272	0.610203	0.61443	0.50949	0.357073	-1.22524	-0.460893	-1.3136	-0.190027	-0.880628	0.00359098	0.697354	-2.36538	Cluster -360	cellular aromatic compound metabolic process;cellular metabolic process;cellular nitrogen compound metabolic process;cellular process;heterocycle metabolic process;macromolecule metabolic process;metabolic process;mRNA metabolic process;mRNA processing;mRNA splicing, via spliceosome;nitrogen compound metabolic process;nucleic acid metabolic process;nucleobase-containing compound metabolic process…	binding;cation binding;ion binding;metal ion binding;nucleic acid binding;organic cyclic compound binding;pre-mRNA 3'-splice site binding;pre-mRNA binding;protein binding;protein domain specific binding;RNA binding;RS domain binding	catalytic complex;catalytic step 2 spliceosome;cellular anatomical entity;nuclear body;nuclear protein-containing complex;nuclear speck;nucleoplasm;protein-containing complex;ribonucleoprotein complex;spliceosomal complex;U2AF complex	Shigellosis;Spliceosome	0.00103863	-2.44305
P22892	P22892	Ap1g1	Ap1g1	AP-1 complex subunit gamma-1	0.480285	1.01525	-0.0549365	0.84002	0.200304	0.541665	0.435322	0.408507	-1.96666	-0.28041	-0.786848	0.455935	-0.69075	0.421551	1.27817	-2.29741	Cluster -360	basolateral protein secretion;biological regulation;cellular component assembly;cellular component organization;cellular component organization or biogenesis;cellular localization;cellular macromolecule localization;cellular process;cytosolic transport;endosome to melanosome transport;endosome to pigment granule transport;establishment of localization;establishment of localization in cell;establi…	binding;cargo adaptor activity;clathrin adaptor activity;cytoskeletal protein binding;enzyme binding;GTPase binding;GTP-dependent protein binding;kinesin binding;molecular adaptor activity;protein binding;protein-macromolecule adaptor activity;small GTPase binding	AP-1 adaptor complex;AP-type membrane coat adaptor complex;bounding membrane of organelle;cellular anatomical entity;clathrin adaptor complex;clathrin-coated pit;clathrin-coated vesicle;coated vesicle;cytoplasmic vesicle;cytosol;early endosome;endosome;Golgi apparatus;Golgi apparatus subcompartment;intracellular membrane-bounded organelle;intracellular organelle;intracellular vesicle;lysosomal me…	Lysosome	0.0490242	-1.21937
B2RY56	B2RY56	Rbm25	Rbm25	RNA-binding protein 25	0.334885	0.446625	0.724665	0.792995	0.701581	0.717222	1.46352	-0.193418	-1.92262	0.083533	-0.447058	-1.1712	-1.16139	0.222555	1.02691	-1.6188	Cluster -360	apoptotic process;biological regulation;cell death;cellular aromatic compound metabolic process;cellular metabolic process;cellular nitrogen compound metabolic process;cellular process;heterocycle metabolic process;macromolecule metabolic process;metabolic process;mRNA metabolic process;mRNA processing;nitrogen compound metabolic process;nucleic acid metabolic process;nucleobase-containing compou…	binding;mRNA binding;nucleic acid binding;organic cyclic compound binding;RNA binding	cellular anatomical entity;cytoplasm;nuclear body;nuclear speck	Spliceosome	0.00710034	-1.95081
Q8CG76	Q8CG76	Akr7a2	Akr7a2	Aflatoxin B1 aldehyde reductase member 2	1.03536	0.511646	0.941219	0.668165	-1.38115	1.16608	0.836065	0.371524	-2.25789	0.262642	-0.897916	-0.205013	-0.930289	0.253323	0.592467	-0.966231	Cluster -360	lipid metabolic process;metabolic process;organic substance metabolic process;primary metabolic process	alcohol dehydrogenase (NADP+) activity;alditol:NADP+ 1-oxidoreductase activity;aldo-keto reductase (NADP) activity;binding;catalytic activity;epoxide hydrolase activity;ether hydrolase activity;hydrolase activity;hydrolase activity, acting on ether bonds;identical protein binding;oxidoreductase activity;oxidoreductase activity, acting on CH-OH group of donors;oxidoreductase activity, acting on th…	cellular anatomical entity;cytoplasm;cytosol;envelope;Golgi apparatus;intracellular membrane-bounded organelle;intracellular organelle;membrane-bounded organelle;mitochondrion;nuclear envelope;organelle;organelle envelope		0.0324895	-0.734983
P97313	P97313	Prkdc	Prkdc	DNA-dependent protein kinase catalytic subunit	0.0146954	0.946089	1.73192	0.956793	0.780222	-1.52651	0.543215	0.487071	-1.0501	-0.515488	-1.42909	-0.134168	0.295412	-0.746377	0.959551	-1.31324	Cluster -360	activation of immune response;activation of innate immune response;anatomical structure development;anatomical structure formation involved in morphogenesis;animal organ development;anterior/posterior pattern specification;apoptotic signaling pathway;B cell activation;B cell differentiation;B cell lineage commitment;biological process involved in interspecies interaction between organisms;biologi…	adenyl nucleotide binding;adenyl ribonucleotide binding;anion binding;ATP binding;binding;carbohydrate derivative binding;catalytic activity;catalytic activity, acting on a protein;DNA binding;DNA-binding transcription factor binding;DNA-dependent protein kinase activity;double-stranded DNA binding;enzyme binding;heterocyclic compound binding;ion binding;kinase activity;nucleic acid binding;nucle…	catalytic complex;cellular anatomical entity;chromatin;DNA repair complex;DNA-dependent protein kinase complex;DNA-dependent protein kinase-DNA ligase 4 complex;intracellular membrane-bounded organelle;intracellular non-membrane-bounded organelle;intracellular organelle;intracellular protein-containing complex;membrane-bounded organelle;nonhomologous end joining complex;non-membrane-bounded organ…	Cell cycle;Non-homologous end-joining	0.0446285	-1.62774	PRKDC
O09044	O09044	Snap23	Snap23	Synaptosomal-associated protein 23	0.414167	0.748239	-1.2555	1.2944	0.948615	1.46162	0.105194	0.768931	-0.834945	0.421305	-0.979436	-1.39327	-0.298859	0.154938	0.290069	-1.84546	Cluster -360	biological regulation;cellular component assembly;cellular component organization;cellular component organization or biogenesis;cellular process;establishment of localization;establishment of localization in cell;exocytic insertion of neurotransmitter receptor to postsynaptic membrane;exocytic process;exocytosis;export from cell;histamine secretion;histamine secretion by mast cell;histamine secre…	binding;molecular adaptor activity;protein binding;protein-macromolecule adaptor activity;SNAP receptor activity;SNARE binding;syntaxin binding;syntaxin-1 binding	adherens junction;anchoring junction;azurophil granule;cell junction;cell projection;cell-cell junction;cellular anatomical entity;cytoplasm;cytoplasmic vesicle;GABA-ergic synapse;glutamatergic synapse;intracellular membrane-bounded organelle;intracellular organelle;intracellular vesicle;lysosome;lytic vacuole;membrane;membrane protein complex;membrane-bounded organelle;mitochondrion;neuron proje…	SNARE interactions in vesicular transport	0.0187421	-1.78358
Q9D0I9	Q9D0I9	Rars1	Rars1	Arginine--tRNA ligase, cytoplasmic	-0.879836	1.02487	0.580866	1.28528	-0.032841	0.532689	1.84232	0.22606	-0.00312943	0.282569	-1.69445	-0.260164	-1.2438	-1.56668	0.417594	-0.511353	Cluster -360	amino acid activation;amino acid metabolic process;arginyl-tRNA aminoacylation;carboxylic acid metabolic process;cellular aromatic compound metabolic process;cellular metabolic process;cellular nitrogen compound metabolic process;cellular process;heterocycle metabolic process;macromolecule metabolic process;metabolic process;ncRNA metabolic process;nitrogen compound metabolic process;nucleic acid…	adenyl nucleotide binding;adenyl ribonucleotide binding;amino acid binding;aminoacyl-tRNA ligase activity;anion binding;arginine binding;arginine-tRNA ligase activity;ATP binding;binding;carbohydrate derivative binding;carboxylic acid binding;catalytic activity;catalytic activity, acting on a nucleic acid;catalytic activity, acting on a tRNA;catalytic activity, acting on RNA;cation binding;hetero…	aminoacyl-tRNA synthetase multienzyme complex;catalytic complex;cellular anatomical entity;cytoplasm;cytosol;intracellular membrane-bounded organelle;intracellular non-membrane-bounded organelle;intracellular organelle;intracellular protein-containing complex;membrane-bounded organelle;mitochondrion;non-membrane-bounded organelle;nucleolus;nucleoplasm;nucleus;organelle;protein-containing complex	Aminoacyl-tRNA biosynthesis	0.0158705	-0.967332
Q9Z1T1	Q9Z1T1	Ap3b1	Ap3b1	AP-3 complex subunit beta-1	0.205974	0.286297	0.538967	0.43348	0.568059	2.19265	0.35946	-0.574251	-0.541417	1.1512	-2.45264	-0.361611	-0.581673	-0.735443	-0.09549	-0.393564	Cluster -360	activation of immune response;activation of innate immune response;anatomical structure development;anatomical structure morphogenesis;animal organ development;animal organ morphogenesis;anterograde axonal transport;anterograde synaptic vesicle transport;antigen processing and presentation;antigen processing and presentation of exogenous antigen;antigen processing and presentation of lipid antige…	binding;enzyme binding;GTP-dependent protein binding;phosphatase binding;protein binding;protein phosphatase binding	AP-3 adaptor complex;AP-type membrane coat adaptor complex;axon cytoplasm;bounding membrane of organelle;cellular anatomical entity;clathrin adaptor complex;clathrin-coated vesicle membrane;coated vesicle membrane;cytoplasm;cytoplasmic region;cytoplasmic vesicle;cytoplasmic vesicle membrane;early endosome;endosome;Golgi apparatus subcompartment;intracellular membrane-bounded organelle;intracellul…	Lysosome	0.039946	-1.54809
P18406	P18406	Ccn1	Ccn1	CCN family member 1	0.258429	-0.908108	1.25857	0.99444	0.453844	1.82729	0.682422	-0.290413	-0.374774	1.00239	-1.43979	-0.366404	0.271684	-1.49974	-1.02703	-0.842814	Cluster -360	anatomical structure development;anatomical structure formation involved in morphogenesis;anatomical structure morphogenesis;angiogenesis;animal organ development;apoptotic process;apoptotic process involved in development;apoptotic process involved in heart morphogenesis;apoptotic process involved in morphogenesis;atrial septum morphogenesis;atrioventricular valve morphogenesis;biological regula…	binding;carbohydrate derivative binding;cell adhesion molecule binding;extracellular matrix binding;glycosaminoglycan binding;growth factor binding;heparin binding;integrin binding;protein binding;protein-containing complex binding;signaling receptor binding;sulfur compound binding	cellular anatomical entity;collagen-containing extracellular matrix;cytosol;external encapsulating structure;extracellular matrix;extracellular region;membrane		0.0265951	-1.61508
P31230	P31230	Aimp1	Aimp1	Aminoacyl tRNA synthase complex-interacting multifunctional protein 1	-0.501187	0.768556	0.510921	0.61574	0.355606	1.55328	1.56469	0.344998	-1.08278	0.607972	-1.662	-1.60201	0.337707	-0.968762	-0.163307	-0.679425	Cluster -360	amide biosynthetic process;amide metabolic process;anatomical structure formation involved in morphogenesis;angiogenesis;apoptotic process;biological regulation;biosynthetic process;cell communication;cell death;cell migration;cell motility;cell-cell signaling;cellular biosynthetic process;cellular metabolic process;cellular nitrogen compound biosynthetic process;cellular nitrogen compound metabo…	binding;cytokine activity;enzyme binding;GTPase binding;identical protein binding;molecular function activator activity;molecular function regulator activity;nucleic acid binding;organic cyclic compound binding;protein binding;protein dimerization activity;protein homodimerization activity;receptor ligand activity;RNA binding;signaling receptor activator activity;signaling receptor binding;signal…	aminoacyl-tRNA synthetase multienzyme complex;catalytic complex;cell surface;cellular anatomical entity;cytosol;endoplasmic reticulum;extracellular space;Golgi apparatus;intracellular membrane-bounded organelle;intracellular organelle;intracellular protein-containing complex;membrane-bounded organelle;nucleus;organelle;protein-containing complex		0.0042786	-1.20855
Q922F4	Q922F4	Tubb6	Tubb6	Tubulin beta-6 chain	0.141597	0.916859	-0.494745	1.40614	1.21534	1.50198	0.0435374	-0.0209648	-0.754593	0.64626	-1.50179	-1.44604	0.461738	-0.420242	-1.56241	-0.132666	Cluster -360	cell cycle;cellular component organization;cellular component organization or biogenesis;cellular process;cytoskeleton organization;microtubule cytoskeleton organization;microtubule-based process;mitotic cell cycle;organelle organization	anion binding;binding;carbohydrate derivative binding;catalytic activity;cation binding;GTP binding;GTPase activity;guanyl nucleotide binding;guanyl ribonucleotide binding;heterocyclic compound binding;hydrolase activity;hydrolase activity, acting on acid anhydrides;hydrolase activity, acting on acid anhydrides, in phosphorus-containing anhydrides;ion binding;metal ion binding;nucleoside phosphat…	cellular anatomical entity;cytoplasm;cytoskeleton;intercellular bridge;intracellular non-membrane-bounded organelle;intracellular organelle;microtubule;microtubule cytoskeleton;mitotic spindle;non-membrane-bounded organelle;organelle;polymeric cytoskeletal fiber;spindle;supramolecular complex;supramolecular fiber;supramolecular polymer	Gap junction;Pathogenic Escherichia coli infection;Phagosome	0.0124614	-1.43638
Q8BG32	Q8BG32	Psmd11	Psmd11	26S proteasome non-ATPase regulatory subunit 11	0.11759	0.584195	0.744515	0.669763	0.36489	1.34576	0.713745	0.425695	-0.866244	-2.44603	-0.27121	0.292364	-2.00707	-0.0193251	0.285806	0.0655482	Cluster -360	catabolic process;cell differentiation;cellular component assembly;cellular component organization;cellular component organization or biogenesis;cellular developmental process;cellular process;developmental process;macromolecule catabolic process;macromolecule metabolic process;metabolic process;modification-dependent macromolecule catabolic process;modification-dependent protein catabolic proces…	structural molecule activity	catalytic complex;endopeptidase complex;intracellular protein-containing complex;peptidase complex;proteasome accessory complex;proteasome complex;proteasome regulatory particle;proteasome regulatory particle, lid subcomplex;protein-containing complex	Proteasome	0.00744035	-1.13853	PSMD11
Q99JX4	Q99JX4	Eif3m	Eif3m	Eukaryotic translation initiation factor 3 subunit M	-0.124772	0.446338	0.486075	0.5494	0.363968	1.36689	1.00399	0.110094	-0.773812	0.149033	-1.34513	0.0260972	1.74607	-1.75974	-0.866554	-1.37794	Cluster -360	amide biosynthetic process;amide metabolic process;biosynthetic process;cellular biosynthetic process;cellular component assembly;cellular component organization;cellular component organization or biogenesis;cellular metabolic process;cellular nitrogen compound biosynthetic process;cellular nitrogen compound metabolic process;cellular process;cytoplasmic translational initiation;formation of cyto…	binding;nucleic acid binding;organic cyclic compound binding;protein binding;translation factor activity, RNA binding;translation initiation factor activity;translation initiation factor binding;translation regulator activity;translation regulator activity, nucleic acid binding	eukaryotic 43S preinitiation complex;eukaryotic 48S preinitiation complex;eukaryotic translation initiation factor 3 complex;eukaryotic translation initiation factor 3 complex, eIF3m;protein-containing complex;ribonucleoprotein complex;translation preinitiation complex		0.0299276	-1.30327
Q8VH51	Q8VH51	Rbm39	Rbm39	RNA-binding protein 39	0.720661	0.334449	1.34038	0.775099	0.867236	0.889817	0.428874	-0.467908	-1.17917	-1.2811	-2.43665	-0.603501	0.0666463	-0.139006	-0.123573	0.807747	Cluster -360	biological regulation;cellular aromatic compound metabolic process;cellular metabolic process;cellular nitrogen compound metabolic process;cellular process;heterocycle metabolic process;macromolecule metabolic process;metabolic process;mRNA metabolic process;mRNA processing;nitrogen compound metabolic process;nucleic acid metabolic process;nucleobase-containing compound metabolic process;organic …	binding;nucleic acid binding;organic cyclic compound binding;protein binding;protein domain specific binding;protein-containing complex binding;ribonucleoprotein complex binding;RNA binding;RS domain binding;snRNP binding;U1 snRNP binding	cellular anatomical entity;centriolar satellite;cytoskeleton;intracellular non-membrane-bounded organelle;intracellular organelle;microtubule cytoskeleton;non-membrane-bounded organelle;nuclear body;nuclear speck;nucleoplasm;organelle;protein-containing complex		0.00874824	-1.41536
P84104	P84104	Srsf3	Srsf3	Serine/arginine-rich splicing factor 3	1.06544	0.399506	1.31809	0.930966	0.548951	0.909797	0.117297	-0.05091	0.351078	-2.53147	-1.47728	-0.75939	-0.544949	-0.293225	0.383565	-0.367461	Cluster -360	biological regulation;cell surface receptor signaling pathway;cellular aromatic compound metabolic process;cellular localization;cellular metabolic process;cellular nitrogen compound metabolic process;cellular process;cellular response to chemical stimulus;cellular response to cytokine stimulus;cellular response to leukemia inhibitory factor;cellular response to organic substance;cellular respons…	binding;enzyme binding;mRNA binding;nucleic acid binding;organic cyclic compound binding;phospholipase binding;primary miRNA binding;protein binding;RNA binding;sequence-specific mRNA binding	cellular anatomical entity;cytoplasm;nuclear body;nuclear speck	Spliceosome	0.0040158	-1.46339
P11440	P11440	Cdk1	Cdk1	Cyclin-dependent kinase 1	0.196682	0.654162	1.78078	0.527539	0.873138	0.770368	-0.43368	-0.0764092	-0.511484	-2.02546	-0.727048	-0.528689	0.902981	-1.72189	-0.355667	0.674673	Cluster -360	anatomical structure development;animal organ development;animal organ regeneration;apoptotic process;biological regulation;cardiac cell development;cardiac muscle cell development;cell cycle checkpoint signaling;cell cycle G1/S phase transition;cell cycle G2/M phase transition;cell cycle phase transition;cell cycle process;cell death;cell development;cell differentiation;cell division;cell popul…	adenyl nucleotide binding;adenyl ribonucleotide binding;anion binding;ATP binding;binding;carbohydrate derivative binding;catalytic activity;catalytic activity, acting on a protein;chromatin binding;cyclin binding;cyclin-dependent protein kinase activity;cyclin-dependent protein serine/threonine kinase activity;heat shock protein binding;heterocyclic compound binding;histone kinase activity;histo…	catalytic complex;cellular anatomical entity;centrosome;cyclin A2-CDK1 complex;cyclin B1-CDK1 complex;cyclin-dependent protein kinase holoenzyme complex;cytoplasm;cytosol;intracellular membrane-bounded organelle;intracellular non-membrane-bounded organelle;intracellular organelle;intracellular organelle lumen;membrane-bounded organelle;membrane-enclosed lumen;microtubule;microtubule organizing ce…	Cell cycle;Gap junction;Oocyte meiosis;p53 signaling pathway;Progesterone-mediated oocyte maturation	0.0259134	-0.891939
Q9ER67	Q9ER67	Maged2	Maged2	MAGE family member D2	0.252661	0.607826	0.719757	0.828176	1.01635	1.79912	-1.58464	0.592463	-1.30842	-0.731639	-1.78016	-0.0412764	-0.817998	-0.025145	0.11121	0.361723	Cluster -360	biological regulation;establishment of localization;female pregnancy;localization;metal ion transport;monoatomic cation transport;monoatomic ion transport;multicellular organismal process;multi-multicellular organism process;multi-organism reproductive process;negative regulation of biological process;negative regulation of biosynthetic process;negative regulation of cellular biosynthetic process…		cellular anatomical entity;cytosol;intracellular membrane-bounded organelle;intracellular non-membrane-bounded organelle;intracellular organelle;membrane-bounded organelle;non-membrane-bounded organelle;nucleolus;nucleoplasm;nucleus;organelle		0.0285617	-1.42513
O08529	O08529	Capn2	Capn2	Calpain-2 catalytic subunit	-0.145853	0.138789	-0.308378	2.11783	1.11391	1.06203	0.0606535	0.522142	-1.16422	-1.15916	-2.01645	0.249235	-0.825676	-0.0699404	-0.0423204	0.467403	Cluster -360	anatomical structure development;anatomical structure formation involved in morphogenesis;behavior;behavioral response to pain;biological regulation;blastocyst development;catabolic process;cell-cell fusion;cellular process;cellular response to acid chemical;cellular response to amino acid stimulus;cellular response to biotic stimulus;cellular response to chemical stimulus;cellular response to cy…	binding;calcium ion binding;calcium-dependent cysteine-type endopeptidase activity;catalytic activity;catalytic activity, acting on a protein;cation binding;cysteine-type endopeptidase activity;cysteine-type peptidase activity;cytoskeletal protein binding;endopeptidase activity;enzyme binding;hydrolase activity;ion binding;metal ion binding;peptidase activity;protein binding;protein-containing co…	anchoring junction;calpain complex;caspase complex;catalytic complex;cell body;cell junction;cell projection;cell-substrate junction;cellular anatomical entity;chromatin;cytoplasm;cytosol;dendrite;endopeptidase complex;endoplasmic reticulum;external side of plasma membrane;focal adhesion;Golgi apparatus;intracellular membrane-bounded organelle;intracellular organelle;lysosome;lytic vacuole;membra…	Alzheimer's disease;Apoptosis;Focal adhesion;Protein processing in endoplasmic reticulum	0.0164017	-1.10888
P63268	P63268	Actg2	Actg2	Actin, gamma-enteric smooth muscle	1.03812	-0.253551	0.361724	1.56198	0.907586	1.26396	-0.689249	-0.158957	0.0160142	-1.59759	-0.246388	0.795971	-1.76057	-1.18912	-0.574532	0.524608	Cluster -360	biological regulation;mesenchyme migration;multicellular organismal process;positive regulation of biological process;positive regulation of biosynthetic process;positive regulation of cellular biosynthetic process;positive regulation of cellular metabolic process;positive regulation of cellular process;positive regulation of gene expression;positive regulation of macromolecule biosynthetic proce…	adenyl nucleotide binding;adenyl ribonucleotide binding;anion binding;ATP binding;binding;carbohydrate derivative binding;catalytic activity;heterocyclic compound binding;hydrolase activity;ion binding;nucleoside phosphate binding;nucleotide binding;organic cyclic compound binding;purine nucleotide binding;purine ribonucleoside triphosphate binding;purine ribonucleotide binding;ribonucleotide bin…	actin-based cell projection;cell body;cell periphery;cell projection;cellular anatomical entity;cytoplasm;cytoskeleton;filopodium;intracellular non-membrane-bounded organelle;intracellular organelle;lamellipodium;myosin filament;non-membrane-bounded organelle;organelle;plasma membrane bounded cell projection;supramolecular complex;supramolecular fiber;supramolecular polymer	Vascular smooth muscle contraction	0.038739	-1.92398
Q8VHX6	Q8VHX6	Flnc	Flnc	Filamin-C	0.721661	0.290823	-0.556273	1.14912	0.569605	1.12862	-0.236383	0.972842	0.364133	-1.3708	-1.18799	0.746664	-2.40142	-0.578626	0.25218	0.135844	Cluster -360	actin cytoskeleton organization;actin filament-based process;actomyosin structure organization;anatomical structure development;cell development;cellular component organization;cellular component organization or biogenesis;cellular developmental process;cellular process;cytoskeleton organization;developmental process;muscle cell development;organelle organization;sarcomere organization	actin binding;actin filament binding;ankyrin binding;binding;cytoskeletal protein binding;identical protein binding;protein binding;protein-containing complex binding	actin cytoskeleton;cellular anatomical entity;cytoplasm;cytoskeleton;cytosol;intercellular bridge;intracellular non-membrane-bounded organelle;intracellular organelle;membrane;non-membrane-bounded organelle;organelle;plasma membrane;sarcolemma;sarcoplasm;Z disc	Focal adhesion;MAPK signaling pathway	0.0382634	-1.37132
B2RQC6	B2RQC6	Cad	Cad	CAD protein	-0.403955	1.23211	1.53345	0.383078	0.860252	0.91754	-0.370609	0.00202172	0.243776	-1.75171	0.152835	-0.0196906	-2.34276	-0.605292	0.284984	-0.116027	Cluster -360	alpha-amino acid biosynthetic process;alpha-amino acid metabolic process;amino acid biosynthetic process;amino acid metabolic process;anatomical structure development;animal organ development;animal organ regeneration;aromatic compound biosynthetic process;biological regulation;biosynthetic process;body fluid secretion;carbohydrate derivative biosynthetic process;carbohydrate derivative metabolic…	adenyl nucleotide binding;adenyl ribonucleotide binding;amino acid binding;anion binding;aspartate carbamoyltransferase activity;ATP binding;binding;carbamoyl-phosphate synthase (glutamine-hydrolyzing) activity;carbohydrate derivative binding;carbon-nitrogen ligase activity, with glutamine as amido-N-donor;carboxyl- or carbamoyltransferase activity;carboxylic acid binding;catalytic activity;catal…	cell body;cell projection;cellular anatomical entity;cytoplasm;cytosol;intracellular membrane-bounded organelle;intracellular organelle;membrane-bounded organelle;neuronal cell body;nuclear matrix;nucleus;organelle;presynapse;protein-containing complex;terminal bouton	Alanine, aspartate and glutamate metabolism;Pyrimidine metabolism	0.0322422	-0.779798
P17710	P17710	Hk1	Hk1	Hexokinase-1	0.0213933	0.999112	1.50527	0.365628	0.287274	1.33724	-0.0791563	-0.374197	-0.172249	-1.922	-1.44362	0.134627	-1.3979	-0.793967	0.764351	0.768192	Cluster -360	ADP catabolic process;ADP metabolic process;aromatic compound catabolic process;ATP metabolic process;biological process involved in interspecies interaction between organisms;biological regulation;canonical glycolysis;carbohydrate catabolic process;carbohydrate derivative catabolic process;carbohydrate derivative metabolic process;carbohydrate homeostasis;carbohydrate metabolic process;carbohydr…	adenyl nucleotide binding;adenyl ribonucleotide binding;anion binding;ATP binding;binding;carbohydrate binding;carbohydrate derivative binding;carbohydrate kinase activity;catalytic activity;catalytic activity, acting on a protein;fructokinase activity;glucokinase activity;glucosamine kinase activity;glucose binding;glycosaminoglycan binding;heterocyclic compound binding;hexokinase activity;ident…	bounding membrane of organelle;caveola;cellular anatomical entity;cytosol;intracellular membrane-bounded organelle;intracellular organelle;membrane;membrane microdomain;membrane raft;membrane-bounded organelle;mitochondrial membrane;mitochondrial outer membrane;mitochondrion;organelle;organelle membrane;organelle outer membrane;outer membrane;plasma membrane raft;plasma membrane region;protein-co…		0.0370086	-0.974221
P68372;P99024;Q9D6F9;Q9ERD7	P68372	Tubb3;Tubb4a;Tubb4b;Tubb5	Tubb3	Tubulin beta-4B chain	1.71568	0.835294	0.568505	0.596791	0.352223	0.0570407	-0.342976	0.15907	-0.61234	-2.49758	0.243181	0.0737717	-1.7633	0.777225	-0.0305352	-0.132054	Cluster -360	cell cycle;cellular component organization;cellular component organization or biogenesis;cellular process;cytoskeleton organization;microtubule cytoskeleton organization;microtubule-based process;mitotic cell cycle;organelle organization	anion binding;binding;carbohydrate derivative binding;catalytic activity;cation binding;double-stranded RNA binding;GTP binding;GTPase activity;guanyl nucleotide binding;guanyl ribonucleotide binding;heterocyclic compound binding;hydrolase activity;hydrolase activity, acting on acid anhydrides;hydrolase activity, acting on acid anhydrides, in phosphorus-containing anhydrides;ion binding;metal ion…	axonemal microtubule;cellular anatomical entity;cytoplasm;cytoplasmic microtubule;cytoskeleton;intercellular bridge;intracellular non-membrane-bounded organelle;intracellular organelle;microtubule;microtubule cytoskeleton;mitotic spindle;myelin sheath;non-membrane-bounded organelle;organelle;polymeric cytoskeletal fiber;protein-containing complex;spindle;supramolecular complex;supramolecular fibe…	Gap junction;Pathogenic Escherichia coli infection;Phagosome	0.0441164	-1.25256
P26638	P26638	Sars1	Sars1	Serine--tRNA ligase, cytoplasmic	0.718073	0.687262	-0.123026	0.759942	0.505911	-0.45338	0.774976	1.16057	-0.427939	-1.22777	-1.51964	0.469288	-2.47117	0.45456	0.690637	0.0017159	Cluster -360	amide biosynthetic process;amide metabolic process;amino acid activation;amino acid metabolic process;biological regulation;biosynthetic process;carboxylic acid metabolic process;cellular aromatic compound metabolic process;cellular biosynthetic process;cellular metabolic process;cellular nitrogen compound biosynthetic process;cellular nitrogen compound metabolic process;cellular process;cytoplas…	adenyl nucleotide binding;adenyl ribonucleotide binding;aminoacyl-tRNA ligase activity;anion binding;ATP binding;binding;carbohydrate derivative binding;catalytic activity;catalytic activity, acting on a nucleic acid;catalytic activity, acting on a tRNA;catalytic activity, acting on RNA;cis-regulatory region sequence-specific DNA binding;DNA binding;double-stranded DNA binding;enzyme binding;hete…	cellular anatomical entity;cytoplasm;cytosol;intracellular membrane-bounded organelle;intracellular organelle;membrane-bounded organelle;mitochondrion;nucleus;organelle	Aminoacyl-tRNA biosynthesis	0.0388123	-1.04664
P49312	P49312	Hnrnpa1	Hnrnpa1	Heterogeneous nuclear ribonucleoprotein A1	0.403591	0.773826	1.75727	0.741965	0.507615	-0.812307	0.637334	0.237697	-0.675441	-1.8306	-0.121404	-0.183595	-2.12612	-0.392799	0.768133	0.314832	Cluster -360	alternative mRNA splicing, via spliceosome;biological regulation;cellular aromatic compound metabolic process;cellular localization;cellular metabolic process;cellular nitrogen compound metabolic process;cellular process;cellular response to arsenic-containing substance;cellular response to chemical stimulus;cellular response to inorganic substance;cellular response to metal ion;cellular response…	annealing activity;binding;DNA binding;DNA/DNA annealing activity;G-rich strand telomeric DNA binding;identical protein binding;miRNA binding;molecular adaptor activity;molecular condensate scaffold activity;mRNA 3'-UTR binding;mRNA binding;nucleic acid binding;organic cyclic compound binding;pre-mRNA binding;protein binding;protein domain specific binding;protein-macromolecule adaptor activity;r…	catalytic complex;catalytic step 2 spliceosome;cell junction;cellular anatomical entity;cytoplasm;intracellular membrane-bounded organelle;intracellular non-membrane-bounded organelle;intracellular organelle;membrane-bounded organelle;non-membrane-bounded organelle;nuclear protein-containing complex;nucleoplasm;nucleoplasmic periphery of the nuclear pore complex;nucleus;organelle;protein-containi…	Spliceosome	0.0278781	-2.04608
Q99JI4	Q99JI4	Psmd6	Psmd6	26S proteasome non-ATPase regulatory subunit 6	-0.224803	0.94763	0.740229	0.551823	0.599194	0.670033	0.974353	0.292427	-2.16803	1.07982	-2.21945	-0.477434	-0.349293	0.161354	-0.186739	-0.391109	Cluster -360	catabolic process;macromolecule catabolic process;macromolecule metabolic process;metabolic process;modification-dependent macromolecule catabolic process;modification-dependent protein catabolic process;nitrogen compound metabolic process;organic substance catabolic process;organic substance metabolic process;organonitrogen compound catabolic process;organonitrogen compound metabolic process;pri…		catalytic complex;endopeptidase complex;intracellular protein-containing complex;peptidase complex;proteasome accessory complex;proteasome complex;proteasome regulatory particle;protein-containing complex	Proteasome	0.0167052	-1.04121	PSMD6
Q3UQ28	Q3UQ28	Pxdn	Pxdn	Peroxidasin homolog	1.60741	0.978707	0.629275	1.37179	0.43587	-1.1048	0.465492	0.61176	-1.38204	-0.760439	-1.10352	-0.463802	-0.354551	0.116025	0.610082	-1.65726	Cluster -360	anatomical structure development;anatomical structure formation involved in morphogenesis;angiogenesis;animal organ development;basement membrane assembly;basement membrane organization;catabolic process;cell adhesion;cellular catabolic process;cellular component assembly;cellular component organization;cellular component organization or biogenesis;cellular metabolic process;cellular process;coll…	antioxidant activity;binding;catalytic activity;cation binding;extracellular matrix binding;extracellular matrix structural constituent;heme binding;ion binding;lactoperoxidase activity;laminin binding;laminin-1 binding;metal ion binding;organic cyclic compound binding;oxidoreductase activity;oxidoreductase activity, acting on peroxide as acceptor;peroxidase activity;protein binding;structural mo…	basement membrane;cell surface;cellular anatomical entity;collagen-containing extracellular matrix;endoplasmic reticulum;external encapsulating structure;extracellular matrix;extracellular space;intracellular membrane-bounded organelle;intracellular organelle;membrane-bounded organelle;organelle		0.0069879	-2.19989	PXDN
Q6ZWV3	Q6ZWV3	Rpl10	Rpl10	Large ribosomal subunit protein uL16	0.0903527	0.899036	0.89207	0.899036	1.13261	0.418301	0.81542	-0.191137	-0.832338	-1.95419	-1.12756	0.0989345	-1.91097	-0.455182	0.519601	0.706023	Cluster -360	amide biosynthetic process;amide metabolic process;anatomical structure development;animal organ development;biological regulation;biosynthetic process;cellular biosynthetic process;cellular component assembly;cellular component organization;cellular component organization or biogenesis;cellular metabolic process;cellular nitrogen compound biosynthetic process;cellular nitrogen compound metabolic…	structural constituent of ribosome;structural molecule activity;translation regulator activity	cell junction;cellular anatomical entity;cytoplasm;cytosol;cytosolic large ribosomal subunit;cytosolic ribosome;endoplasmic reticulum;intracellular membrane-bounded organelle;intracellular non-membrane-bounded organelle;intracellular organelle;large ribosomal subunit;membrane-bounded organelle;non-membrane-bounded organelle;nucleus;organelle;postsynapse;presynapse;protein-containing complex;ribon…	Ribosome	0.00760724	-2.01231	RPL10
Q9Z204	Q9Z204	Hnrnpc	Hnrnpc	Heterogeneous nuclear ribonucleoproteins C1/C2	0.220188	0.296441	1.81437	0.700745	0.303103	0.212969	0.0981774	0.649751	-0.614246	-1.15792	-0.283081	0.2057	-2.87384	-0.295491	0.539553	0.183581	Cluster -360	3'-UTR-mediated mRNA stabilization;biological regulation;cellular aromatic compound metabolic process;cellular metabolic process;cellular nitrogen compound metabolic process;cellular process;heterocycle metabolic process;macromolecule metabolic process;metabolic process;mRNA metabolic process;mRNA processing;mRNA splicing, via spliceosome;mRNA stabilization;negative regulation of biological proce…	binding;deaminase binding;enzyme binding;enzyme inhibitor activity;enzyme regulator activity;identical protein binding;molecular adaptor activity;molecular function inhibitor activity;molecular function regulator activity;mRNA 3'-UTR binding;mRNA binding;N6-methyladenosine-containing RNA reader activity;nucleic acid binding;organic cyclic compound binding;poly(U) RNA binding;poly-pyrimidine tract…	actin cytoskeleton;catalytic complex;catalytic step 2 spliceosome;cellular anatomical entity;cytoskeleton;cytosol;intracellular membrane-bounded organelle;intracellular non-membrane-bounded organelle;intracellular organelle;membrane-bounded organelle;non-membrane-bounded organelle;nuclear protein-containing complex;nucleoplasm;nucleoplasmic periphery of the nuclear pore complex;nucleus;organelle;…	Spliceosome	0.0257811	-1.49569
P09405	P09405	Ncl	Ncl	Nucleolin	0.6685	0.249206	0.655889	0.582957	-0.0266771	0.991759	0.907804	0.147995	0.408632	-2.30166	0.0504181	-0.146517	-2.49868	-0.0837025	0.389341	0.00473894	Cluster -360	anatomical structure formation involved in morphogenesis;angiogenesis;biological regulation;cellular process;cellular response to biotic stimulus;cellular response to chemical stimulus;cellular response to cytokine stimulus;cellular response to endogenous stimulus;cellular response to epidermal growth factor stimulus;cellular response to growth factor stimulus;cellular response to leukemia inhibi…	binding;calcium ion binding;cation binding;DNA binding;DNA topoisomerase binding;enzyme binding;ErbB-4 class receptor binding;extracellular matrix binding;histone binding;identical protein binding;insulin receptor substrate binding;ion binding;laminin binding;metal ion binding;mRNA 5'-UTR binding;mRNA binding;nucleic acid binding;organic cyclic compound binding;PH domain binding;protein binding;p…	cell cortex;cell surface;cellular anatomical entity;chromosome;cornified envelope;cytoplasm;cytoplasmic ribonucleoprotein granule;dense fibrillar component;fibrillar center;intracellular membrane-bounded organelle;intracellular non-membrane-bounded organelle;intracellular organelle;membrane;membrane-bounded organelle;non-membrane-bounded organelle;nuclear protein-containing complex;nucleolus;nucl…	Pathogenic Escherichia coli infection	0.0310926	-2.43326
Q8BL97	Q8BL97	Srsf7	Srsf7	Serine/arginine-rich splicing factor 7	1.11457	0.192999	1.46295	0.672709	0.42408	0.738721	0.130054	0.440743	0.0748917	-2.27028	-0.758192	-0.49794	-2.03502	-0.031745	0.233165	0.108298	Cluster -360	biological regulation;cellular aromatic compound metabolic process;cellular metabolic process;cellular nitrogen compound metabolic process;cellular process;cellular response to chemical stimulus;cellular response to cytokine stimulus;cellular response to leukemia inhibitory factor;cellular response to organic substance;cellular response to stimulus;establishment of localization;establishment of R…	binding;cation binding;ion binding;metal ion binding;mRNA binding;nucleic acid binding;organic cyclic compound binding;protein binding;protein domain specific binding;RNA binding;transition metal ion binding;zinc ion binding	cellular anatomical entity;cytoplasm;nuclear body;nuclear speck;nucleoplasm	Spliceosome	0.0046546	-1.58944
Q62093	Q62093	Srsf2	Srsf2	Serine/arginine-rich splicing factor 2	1.25259	-0.105491	0.725408	0.745911	0.225445	0.675995	1.06331	-0.0688826	0.402034	-2.02647	0.21995	-0.443796	-2.40835	-0.090698	0.339766	-0.506717	Cluster -360	biological regulation;cellular aromatic compound metabolic process;cellular metabolic process;cellular nitrogen compound metabolic process;cellular process;heterocycle metabolic process;macromolecule metabolic process;metabolic process;mRNA metabolic process;mRNA processing;mRNA splicing, via spliceosome;nitrogen compound metabolic process;nucleic acid metabolic process;nucleobase-containing comp…	binding;enzyme binding;kinase binding;nucleic acid binding;organic cyclic compound binding;pre-mRNA binding;protein binding;protein kinase binding;protein kinase C binding;RNA binding	cellular anatomical entity;cytosol;interchromatin granule;intracellular membrane-bounded organelle;intracellular organelle;membrane-bounded organelle;nuclear body;nuclear protein-containing complex;nuclear speck;nucleoplasm;nucleus;organelle;perichromatin fibrils;protein-containing complex;ribonucleoprotein complex;spliceosomal complex	Spliceosome	0.0178259	-1.50781
Q9EQU5	Q9EQU5	Set	Set	Protein SET	-0.095472	1.00687	1.43655	0.942196	0.120754	-0.251013	0.974875	-0.161648	-0.327154	-1.69561	0.172738	-0.72631	-2.17592	-0.658187	1.05875	0.378581	Cluster -360	biological regulation;cellular component assembly;cellular component organization;cellular component organization or biogenesis;cellular process;chromatin organization;chromatin remodeling;negative regulation of apoptotic process;negative regulation of biological process;negative regulation of cellular process;negative regulation of neuron apoptotic process;negative regulation of programmed cell …	binding;chromatin binding;DNA binding;histone binding;nucleic acid binding;organic cyclic compound binding;protein binding;protein-containing complex binding	cellular anatomical entity;chromatin;cytoplasm;cytosol;endoplasmic reticulum;intracellular membrane-bounded organelle;intracellular non-membrane-bounded organelle;intracellular organelle;lipid droplet;membrane-bounded organelle;non-membrane-bounded organelle;nucleoplasm;nucleus;organelle;perinuclear region of cytoplasm;protein-containing complex;protein-DNA complex		0.0421754	-0.936355	SET
P40124;Q9CYT6	P40124	Cap1;Cap2	Cap1	Adenylyl cyclase-associated protein 1	0.518394	0.00326765	-0.288705	0.992866	0.449589	1.51307	0.697463	0.275264	-0.506851	-1.9726	-0.522738	0.507148	-2.02529	0.165485	1.04073	-0.847088	Cluster -360	actin cytoskeleton organization;actin filament organization;actin filament-based process;ameboidal-type cell migration;anatomical structure morphogenesis;biological regulation;cAMP-mediated signaling;cell migration;cell morphogenesis;cell motility;cellular component organization;cellular component organization or biogenesis;cellular process;cyclic-nucleotide-mediated signaling;cytoskeleton organi…	actin binding;adenylate cyclase binding;binding;cytoskeletal protein binding;enzyme binding;protein binding	cellular anatomical entity;cortical actin cytoskeleton;cortical cytoskeleton;cytoplasm;cytoskeleton;cytosol;extracellular region;intracellular non-membrane-bounded organelle;intracellular organelle;membrane;non-membrane-bounded organelle;organelle;plasma membrane		0.0318812	-1.02265
P19096	P19096	Fasn	Fasn	Fatty acid synthase	0.442593	0.962075	-0.130467	0.498666	0.562063	-0.544735	1.47328	0.650226	-1.40112	-1.7279	-0.62627	0.102653	-2.00369	0.509515	0.718207	0.514895	Cluster -360	acetyl-CoA metabolic process;acyl-CoA metabolic process;amide metabolic process;anatomical structure development;animal organ development;biological process involved in interaction with symbiont;biological process involved in interspecies interaction between organisms;biological process involved in symbiotic interaction;biosynthetic process;carbohydrate derivative metabolic process;carboxylic aci…	(3R)-3-hydroxydecanoyl-[acyl-carrier-protein] dehydratase activity;(3R)-3-hydroxyoctanoyl-[acyl-carrier-protein] dehydratase activity;(3R)-hydroxyacyl-[acyl-carrier-protein] dehydratase activity;(3R)-hydroxybutanoyl-[acyl-carrier-protein] hydratase activity;(3R)-hydroxymyristoyl-[acyl-carrier-protein] dehydratase activity;(3R)-hydroxypalmitoyl-[acyl-carrier-protein] dehydratase activity;[acyl-car…	cellular anatomical entity;cytoplasm;cytoplasmic vesicle;cytosol;glycogen granule;Golgi apparatus;intracellular membrane-bounded organelle;intracellular organelle;intracellular vesicle;melanosome;membrane;membrane-bounded organelle;mitochondrion;organelle;pigment granule;plasma membrane;vesicle	Fatty acid biosynthesis;Insulin signaling pathway	0.0458935	-1.40673		FASN
P80314	P80314	Cct2	Cct2	T-complex protein 1 subunit beta	0.427426	0.691171	0.406841	0.713165	0.298657	-0.257335	1.86119	0.385918	-0.880992	-1.64123	-1.18295	0.260476	-2.02847	0.0134348	0.919265	0.0134348	Cluster -360	binding of sperm to zona pellucida;biological regulation;cell recognition;cell-cell recognition;cellular component assembly;cellular component organization;cellular component organization or biogenesis;cellular process;chaperone mediated protein folding independent of cofactor;chaperone-mediated protein complex assembly;chaperone-mediated protein folding;'de novo' post-translational protein foldi…	adenyl nucleotide binding;adenyl ribonucleotide binding;anion binding;ATP binding;ATP hydrolysis activity;ATP-dependent activity;ATP-dependent protein folding chaperone;binding;carbohydrate derivative binding;catalytic activity;enzyme binding;heterocyclic compound binding;hydrolase activity;hydrolase activity, acting on acid anhydrides;hydrolase activity, acting on acid anhydrides, in phosphorus-…	cell body;cellular anatomical entity;chaperonin-containing T-complex;cytosol;intracellular protein-containing complex;microtubule;myelin sheath;polymeric cytoskeletal fiber;protein folding chaperone complex;protein-containing complex;supramolecular complex;supramolecular fiber;supramolecular polymer;zona pellucida receptor complex		0.0174291	-1.26904		CCT2
O08810;P58252	O08810	Eef2;Eftud2	Eef2	116 kDa U5 small nuclear ribonucleoprotein component	0.333546	0.600433	0.613385	0.578374	0.581721	0.259157	1.02638	0.259157	-0.449493	-1.92453	-0.550949	0.312093	-2.73627	0.145453	0.583945	0.367603	Cluster -360	cellular aromatic compound metabolic process;cellular metabolic process;cellular nitrogen compound metabolic process;cellular process;heterocycle metabolic process;macromolecule metabolic process;metabolic process;mRNA metabolic process;mRNA processing;mRNA splicing, via spliceosome;nitrogen compound metabolic process;nucleic acid metabolic process;nucleobase-containing compound metabolic process…	anion binding;binding;carbohydrate derivative binding;catalytic activity;GTP binding;GTPase activity;guanyl nucleotide binding;guanyl ribonucleotide binding;heterocyclic compound binding;hydrolase activity;hydrolase activity, acting on acid anhydrides;hydrolase activity, acting on acid anhydrides, in phosphorus-containing anhydrides;ion binding;nucleic acid binding;nucleoside phosphate binding;nu…	Cajal body;catalytic complex;catalytic step 2 spliceosome;cellular anatomical entity;cytosol;intracellular membrane-bounded organelle;intracellular organelle;membrane-bounded organelle;nuclear body;nuclear protein-containing complex;nuclear speck;nucleoplasm;nucleus;organelle;precatalytic spliceosome;protein-containing complex;ribonucleoprotein complex;small nuclear ribonucleoprotein complex;Sm-l…	Spliceosome	0.0276501	-1.89201		EEF2
O70251	O70251	Eef1b	Eef1b	Elongation factor 1-beta	0.218908	0.820577	0.083212	0.510429	0.601042	0.48373	1.1695	0.218908	-0.700601	-2.14603	-0.186115	0.546647	-2.47456	-0.0644052	0.561778	0.356984	Cluster -360	biosynthetic process;cellular biosynthetic process;cellular metabolic process;cellular process;macromolecule biosynthetic process;macromolecule metabolic process;metabolic process;organic substance biosynthetic process;organic substance metabolic process;response to alcohol;response to chemical;response to ethanol;response to organic substance;response to oxygen-containing compound;response to st…	binding;enzyme regulator activity;GTPase regulator activity;guanyl-nucleotide exchange factor activity;molecular function regulator activity;nucleic acid binding;nucleoside-triphosphatase regulator activity;organic cyclic compound binding;translation elongation factor activity;translation factor activity, RNA binding;translation regulator activity;translation regulator activity, nucleic acid bind…	cellular anatomical entity;cytoplasm;cytosol;endoplasmic reticulum;eukaryotic translation elongation factor 1 complex;intracellular membrane-bounded organelle;intracellular organelle;membrane-bounded organelle;organelle;protein-containing complex		0.0346636	-1.47939
P58252	P58252	Eef2	Eef2	Elongation factor 2	0.391382	0.648997	0.50586	0.580649	0.609129	0.221591	1.11186	0.27579	-0.439607	-2.59502	-0.614781	0.279058	-2.06733	0.223342	0.522833	0.346245	Cluster -360	amide biosynthetic process;amide metabolic process;biological regulation;biosynthetic process;cell differentiation;cellular biosynthetic process;cellular developmental process;cellular metabolic process;cellular nitrogen compound biosynthetic process;cellular nitrogen compound metabolic process;cellular process;developmental process;hematopoietic progenitor cell differentiation;macromolecule bios…	5S rRNA binding;actin binding;actin filament binding;anion binding;binding;carbohydrate derivative binding;catalytic activity;cytoskeletal protein binding;enzyme binding;GTP binding;GTPase activity;guanyl nucleotide binding;guanyl ribonucleotide binding;heterocyclic compound binding;hydrolase activity;hydrolase activity, acting on acid anhydrides;hydrolase activity, acting on acid anhydrides, in …	aggresome;cell junction;cellular anatomical entity;cytoplasm;cytosol;glutamatergic synapse;inclusion body;intracellular anatomical structure;intracellular non-membrane-bounded organelle;intracellular organelle;membrane;non-membrane-bounded organelle;organelle;plasma membrane;polysomal ribosome;polysome;postsynapse;protein-containing complex;ribonucleoprotein complex;ribosome;synapse		0.0237776	-1.9737		EEF2
P70168	P70168	Kpnb1	Kpnb1	Importin subunit beta-1	0.264464	0.823456	0.547789	0.761514	0.750876	0.00772133	0.639018	0.572795	-0.983301	-2.4058	-0.494071	0.2484	-2.09097	0.326671	0.528689	0.502746	Cluster -360	astral microtubule organization;biological regulation;cell cycle process;cellular component assembly;cellular component organization;cellular component organization or biogenesis;cellular localization;cellular macromolecule localization;cellular process;chromosome localization;chromosome movement towards spindle pole;cytoplasmic microtubule organization;cytoskeleton organization;establishment of …	amide binding;binding;cytoskeletal protein binding;enzyme binding;GTPase binding;heat shock protein binding;Hsp90 protein binding;importin-alpha family protein binding;kinesin binding;molecular carrier activity;nuclear import signal receptor activity;nuclear localization sequence binding;nucleocytoplasmic carrier activity;peptide binding;protein binding;protein domain specific binding;protein-con…	cellular anatomical entity;cytoplasm;cytoplasmic ribonucleoprotein granule;cytoplasmic stress granule;cytosol;endoplasmic reticulum subcompartment;endoplasmic reticulum tubular network;envelope;intracellular membrane-bounded organelle;intracellular non-membrane-bounded organelle;intracellular organelle;membrane;membrane-bounded organelle;NLS-dependent protein nuclear import complex;non-membrane-b…	RNA transport	0.0229122	-1.2989		KPNB1
P80318	P80318	Cct3	Cct3	T-complex protein 1 subunit gamma	0.431771	0.578623	0.574159	0.626647	0.431771	0.406283	1.5986	0.186076	-0.760022	-2.04935	-0.809147	0.102535	-2.17864	0.109176	0.78276	-0.0312422	Cluster -360	binding of sperm to zona pellucida;biological regulation;cell recognition;cell-cell recognition;cellular process;chaperone-mediated protein folding;establishment of localization;localization;positive regulation of biological process;positive regulation of biosynthetic process;positive regulation of cellular biosynthetic process;positive regulation of cellular component organization;positive regul…	adenyl nucleotide binding;adenyl ribonucleotide binding;anion binding;ATP binding;ATP hydrolysis activity;ATP-dependent activity;ATP-dependent protein folding chaperone;binding;carbohydrate derivative binding;catalytic activity;heterocyclic compound binding;hydrolase activity;hydrolase activity, acting on acid anhydrides;hydrolase activity, acting on acid anhydrides, in phosphorus-containing anhy…	cell body;cellular anatomical entity;chaperonin-containing T-complex;intracellular protein-containing complex;microtubule;myelin sheath;polymeric cytoskeletal fiber;protein folding chaperone complex;protein-containing complex;supramolecular complex;supramolecular fiber;supramolecular polymer;zona pellucida receptor complex		0.00977512	-1.47111		CCT3
P42932	P42932	Cct8	Cct8	T-complex protein 1 subunit theta	0.412477	0.589125	0.473218	0.569048	0.265449	0.255514	1.28458	0.378871	-0.410183	-2.38562	-0.49881	0.248822	-2.28443	0.238679	0.737621	0.125631	Cluster -360	binding of sperm to zona pellucida;biological regulation;cell recognition;cell-cell recognition;cellular process;chaperone-mediated protein folding;establishment of localization;localization;positive regulation of biological process;positive regulation of biosynthetic process;positive regulation of cellular biosynthetic process;positive regulation of cellular component organization;positive regul…	adenyl nucleotide binding;adenyl ribonucleotide binding;anion binding;ATP binding;ATP hydrolysis activity;ATP-dependent activity;ATP-dependent protein folding chaperone;binding;carbohydrate derivative binding;catalytic activity;heterocyclic compound binding;hydrolase activity;hydrolase activity, acting on acid anhydrides;hydrolase activity, acting on acid anhydrides, in phosphorus-containing anhy…	cell body;cell projection;cellular anatomical entity;centrosome;chaperonin-containing T-complex;cilium;cytoplasm;cytoskeleton;cytosol;intermediate filament cytoskeleton;intracellular non-membrane-bounded organelle;intracellular organelle;intracellular protein-containing complex;membrane-bounded organelle;microtubule;microtubule organizing center;non-membrane-bounded organelle;nucleoplasm;organell…		0.0287163	-1.89112
P80316	P80316	Cct5	Cct5	T-complex protein 1 subunit epsilon	0.364224	0.570415	0.364224	0.550618	0.162841	0.225057	1.68495	0.24227	-0.52371	-2.28677	-0.343231	0.0681226	-2.16059	0.0779292	0.906338	0.0973113	Cluster -360	binding of sperm to zona pellucida;biological process involved in interspecies interaction between organisms;biological regulation;cell recognition;cell-cell recognition;cellular process;chaperone-mediated protein folding;establishment of localization;localization;positive regulation of biological process;positive regulation of biosynthetic process;positive regulation of cellular biosynthetic pro…	adenyl nucleotide binding;adenyl ribonucleotide binding;anion binding;ATP binding;ATP hydrolysis activity;ATP-dependent activity;ATP-dependent protein folding chaperone;beta-tubulin binding;binding;carbohydrate derivative binding;catalytic activity;cytoskeletal protein binding;G-protein beta-subunit binding;heterocyclic compound binding;hydrolase activity;hydrolase activity, acting on acid anhydr…	cell body;cellular anatomical entity;centrosome;chaperonin-containing T-complex;intracellular protein-containing complex;microtubule;microtubule organizing center;myelin sheath;polymeric cytoskeletal fiber;protein folding chaperone complex;protein-containing complex;supramolecular complex;supramolecular fiber;supramolecular polymer		0.031715	-1.22047		CCT5
Q99NB9	Q99NB9	Sf3b1	Sf3b1	Splicing factor 3B subunit 1	1.11439	0.70522	1.39177	0.770719	0.664671	-1.2425	1.33194	-0.0721978	-0.957737	-0.349266	-1.80715	-0.539325	-0.912486	-0.131812	0.888217	-0.854453	Cluster -360	anatomical structure formation involved in morphogenesis;anterior/posterior pattern specification;biological regulation;blastocyst formation;cellular aromatic compound metabolic process;cellular component assembly;cellular component organization;cellular component organization or biogenesis;cellular metabolic process;cellular nitrogen compound metabolic process;cellular process;chromatin organiza…	binding;chromatin binding;mRNA binding;nucleic acid binding;organic cyclic compound binding;protein binding;protein-containing complex binding;RNA binding;splicing factor binding	ATPase complex;B-WICH complex;catalytic complex;catalytic step 2 spliceosome;cellular anatomical entity;chromatin;intracellular membrane-bounded organelle;intracellular non-membrane-bounded organelle;intracellular organelle;membrane-bounded organelle;non-membrane-bounded organelle;nuclear body;nuclear matrix;nuclear protein-containing complex;nuclear speck;nucleolus;nucleus;organelle;precatalytic…		0.0135848	-1.48015	SF3B1
Q9D8N0	Q9D8N0	Eef1g	Eef1g	Elongation factor 1-gamma	0.303487	0.652258	0.81452	0.534725	0.249333	0.282207	1.24851	0.256741	-0.615441	-2.58733	-0.502089	0.393583	-1.9165	0.0508465	0.779699	0.0554503	Cluster -360	biological process involved in interspecies interaction between organisms;biosynthetic process;cellular biosynthetic process;cellular metabolic process;cellular process;macromolecule biosynthetic process;macromolecule metabolic process;metabolic process;organic substance biosynthetic process;organic substance metabolic process;response to biotic stimulus;response to external biotic stimulus;respo…	binding;nucleic acid binding;organic cyclic compound binding;translation elongation factor activity;translation factor activity, RNA binding;translation regulator activity;translation regulator activity, nucleic acid binding	cellular anatomical entity;cytoplasm;endoplasmic reticulum;intracellular membrane-bounded organelle;intracellular organelle;membrane-bounded organelle;nucleus;organelle		0.0239142	-1.7048
P80317	P80317	Cct6a	Cct6a	T-complex protein 1 subunit zeta	0.362325	0.569997	0.556531	0.481427	0.389468	0.141091	1.44292	0.340058	-0.652359	-2.59429	-0.672071	0.317275	-1.78618	0.214107	0.827468	0.0622262	Cluster -360	binding of sperm to zona pellucida;biological regulation;cell recognition;cell-cell recognition;cellular process;chaperone-mediated protein folding;establishment of localization;localization;positive regulation of biological process;positive regulation of biosynthetic process;positive regulation of cellular biosynthetic process;positive regulation of cellular component organization;positive regul…	adenyl nucleotide binding;adenyl ribonucleotide binding;anion binding;ATP binding;ATP hydrolysis activity;ATP-dependent activity;ATP-dependent protein folding chaperone;binding;carbohydrate derivative binding;catalytic activity;heterocyclic compound binding;hydrolase activity;hydrolase activity, acting on acid anhydrides;hydrolase activity, acting on acid anhydrides, in phosphorus-containing anhy…	acrosomal vesicle;cell body;cellular anatomical entity;chaperonin-containing T-complex;cytoplasmic vesicle;cytosol;intracellular membrane-bounded organelle;intracellular organelle;intracellular protein-containing complex;intracellular vesicle;membrane-bounded organelle;microtubule;organelle;polymeric cytoskeletal fiber;protein folding chaperone complex;protein-containing complex;secretory granule…		0.0262826	-1.56816
P08113;P11499	P08113	Hsp90ab1;Hsp90b1	Hsp90ab1	Endoplasmin	0.0193119	0.626268	0.461998	0.286239	0.42584	1.08526	0.785311	0.50588	-0.363473	-2.03446	-0.497322	0.733974	-2.62055	0.0896593	0.136787	0.359271	Cluster -360	actin filament bundle assembly;actin filament bundle organization;actin filament organization;actin rod assembly;amide metabolic process;biological regulation;catabolic process;cellular component assembly;cellular component organization;cellular component organization or biogenesis;cellular localization;cellular macromolecule localization;cellular process;cellular response to ATP;cellular respons…	adenyl nucleotide binding;adenyl ribonucleotide binding;anion binding;ATP binding;ATP hydrolysis activity;ATP-dependent activity;ATP-dependent protein folding chaperone;binding;carbohydrate derivative binding;catalytic activity;enzyme binding;heterocyclic compound binding;hydrolase activity;hydrolase activity, acting on acid anhydrides;hydrolase activity, acting on acid anhydrides, in phosphorus-…	cellular anatomical entity;cytoplasmic vesicle;cytosol;endoplasmic reticulum;endoplasmic reticulum chaperone complex;endoplasmic reticulum lumen;endoplasmic reticulum membrane;endoplasmic reticulum protein-containing complex;extracellular region;intracellular membrane-bounded organelle;intracellular organelle;intracellular organelle lumen;intracellular vesicle;melanosome;membrane;membrane-bounded…	NOD-like receptor signaling pathway;Pathways in cancer;Plant-pathogen interaction;Prostate cancer;Protein processing in endoplasmic reticulum	0.0302031	-2.01077		HSP90AB1
P10126;P62631	P10126	Eef1a1;Eef1a2	Eef1a1	Elongation factor 1-alpha 1	0.112637	0.577559	0.59299	0.507697	0.540931	1.23892	0.157968	0.241759	-0.172903	-2.43168	-0.224946	0.357414	-2.38467	0.090408	0.381486	0.414427	Cluster -360	amide biosynthetic process;amide metabolic process;biological process involved in interaction with symbiont;biological process involved in interspecies interaction between organisms;biological process involved in symbiotic interaction;biological regulation;biosynthetic process;cellular biosynthetic process;cellular metabolic process;cellular nitrogen compound biosynthetic process;cellular nitroge…	anion binding;binding;calmodulin binding;carbohydrate derivative binding;catalytic activity;enzyme binding;GTP binding;GTPase activity;guanyl nucleotide binding;guanyl ribonucleotide binding;heterocyclic compound binding;hydrolase activity;hydrolase activity, acting on acid anhydrides;hydrolase activity, acting on acid anhydrides, in phosphorus-containing anhydrides;identical protein binding;ion …	cell projection membrane;cellular anatomical entity;cortical actin cytoskeleton;cortical cytoskeleton;cytoplasm;cytoskeleton;cytosol;cytosolic ribosome;intracellular membrane-bounded organelle;intracellular non-membrane-bounded organelle;intracellular organelle;leading edge membrane;membrane;membrane-bounded organelle;myelin sheath;non-membrane-bounded organelle;nucleolus;nucleus;organelle;plasma…	RNA transport	0.042336	-1.74126		EEF1A1
P11499	P11499	Hsp90ab1	Hsp90ab1	Heat shock protein HSP 90-beta	0.0770425	0.405902	0.533225	0.47237	0.61955	1.22739	0.648544	0.232444	-0.330844	-2.83019	-0.436274	0.238742	-1.78394	0.0325392	0.385729	0.50777	Cluster -360	adhesion of symbiont to host;adhesion of symbiont to host cell;anatomical structure development;anatomical structure morphogenesis;animal organ development;aromatic compound biosynthetic process;axon extension;axonogenesis;biological process involved in interaction with host;biological process involved in interspecies interaction between organisms;biological process involved in symbiotic interact…	adenyl deoxyribonucleotide binding;adenyl nucleotide binding;adenyl ribonucleotide binding;amide binding;anion binding;ATP binding;ATP hydrolysis activity;ATP-dependent activity;ATP-dependent protein binding;ATP-dependent protein folding chaperone;binding;carbohydrate derivative binding;catalytic activity;CTP binding;cytoskeletal protein binding;dATP binding;deoxyribonucleotide binding;disordered…	apical plasma membrane;aryl hydrocarbon receptor complex;axonal growth cone;basolateral plasma membrane;bounding membrane of organelle;brush border membrane;cell body;cell projection membrane;cell surface;cellular anatomical entity;COP9 signalosome;cytoplasm;cytoplasmic vesicle;cytosol;dendrite terminus;dendritic growth cone;dynein axonemal particle;extracellular region;growth cone;HSP90-CDC37 ch…	Antigen processing and presentation;NOD-like receptor signaling pathway;Pathways in cancer;Plant-pathogen interaction;Progesterone-mediated oocyte maturation;Prostate cancer;Protein processing in endoplasmic reticulum	0.0292559	-2.10886		HSP90AB1
P62754	P62754	Rps6	Rps6	Small ribosomal subunit protein eS6	0.207652	0.711425	0.55645	0.761841	0.805643	0.673043	0.720641	-0.00941855	-0.530837	-2.61298	-0.345814	0.312237	-2.02744	-0.179372	0.400481	0.55645	Cluster -360	activation-induced cell death of T cells;amide biosynthetic process;amide metabolic process;anatomical structure development;anatomical structure morphogenesis;animal organ development;apoptotic process;biological regulation;biosynthetic process;carbohydrate homeostasis;cell activation;cell activation involved in immune response;cell cycle;cell cycle G1/S phase transition;cell cycle phase transit…	binding;enzyme binding;kinase binding;mRNA binding;nucleic acid binding;organic cyclic compound binding;protein binding;protein kinase binding;RNA binding;structural constituent of ribosome;structural molecule activity	cell body;cell junction;cell projection;cellular anatomical entity;cytoplasm;cytoplasmic ribonucleoprotein granule;cytosol;cytosolic ribosome;cytosolic small ribosomal subunit;dendrite;endoplasmic reticulum;GABA-ergic synapse;intracellular membrane-bounded organelle;intracellular non-membrane-bounded organelle;intracellular organelle;membrane-bounded organelle;neuron projection;non-membrane-bound…	Insulin signaling pathway;mTOR signaling pathway;Ribosome	0.0207241	-2.71416
O88685	O88685	Psmc3	Psmc3	26S proteasome regulatory subunit 6A	0.312888	0.883132	0.574164	0.759843	0.385621	1.21476	0.409093	0.594844	-0.901011	-1.90609	-0.55617	0.275134	-2.46406	-0.0130146	0.409093	0.0217734	Cluster -360	anatomical structure development;biological process involved in interaction with symbiont;biological process involved in interspecies interaction between organisms;biological process involved in symbiotic interaction;biological regulation;blastocyst development;catabolic process;developmental process;macromolecule catabolic process;macromolecule metabolic process;metabolic process;modification-de…	adenyl nucleotide binding;adenyl ribonucleotide binding;anion binding;ATP binding;ATP hydrolysis activity;ATP-dependent activity;binding;carbohydrate derivative binding;catalytic activity;heterocyclic compound binding;hydrolase activity;hydrolase activity, acting on acid anhydrides;hydrolase activity, acting on acid anhydrides, in phosphorus-containing anhydrides;identical protein binding;ion bin…	catalytic complex;cellular anatomical entity;cytoplasmic ribonucleoprotein granule;endopeptidase complex;intracellular membrane-bounded organelle;intracellular non-membrane-bounded organelle;intracellular organelle;intracellular protein-containing complex;membrane-bounded organelle;non-membrane-bounded organelle;nucleus;organelle;P-body;peptidase complex;perinuclear region of cytoplasm;proteasome…	Proteasome	0.00513498	-1.25241
P60122	P60122	Ruvbl1	Ruvbl1	RuvB-like 1	0.2774	0.839186	0.294495	0.521461	0.414296	1.15267	0.92479	0.383703	-1.41699	-2.2164	-0.532387	0.2774	-1.9051	0.148943	0.61222	0.224321	Cluster -360	biological regulation;box C/D snoRNP assembly;cell cycle;cell division;cellular aromatic compound metabolic process;cellular component assembly;cellular component organization;cellular component organization or biogenesis;cellular metabolic process;cellular nitrogen compound metabolic process;cellular process;cellular response to stimulus;cellular response to stress;chromatin organization;chromat…	3'-5' DNA helicase activity;adenyl nucleotide binding;adenyl ribonucleotide binding;ADP binding;anion binding;ATP binding;ATP hydrolysis activity;ATPase binding;ATP-dependent activity;ATP-dependent activity, acting on DNA;basal RNA polymerase II transcription machinery binding;basal transcription machinery binding;binding;carbohydrate derivative binding;catalytic activity;catalytic activity, acti…	acetyltransferase complex;ATPase complex;catalytic complex;cellular anatomical entity;cytosol;dynein axonemal particle;H4 histone acetyltransferase complex;H4/H2A histone acetyltransferase complex;histone acetyltransferase complex;histone deacetylase complex;histone methyltransferase complex;Ino80 complex;INO80-type complex;intracellular membrane-bounded organelle;intracellular non-membrane-bound…	Wnt signaling pathway	0.0102942	-1.70491
P08228	P08228	Sod1	Sod1	Superoxide dismutase [Cu-Zn]	0.494919	-0.682403	-2.01313	0.0828026	-0.71741	-0.847837	-0.530968	0.306712	-1.06768	0.758736	1.0508	0.513493	-0.849041	0.772794	1.8627	0.865505	Cluster -359	action potential;action potential initiation;anatomical structure development;anatomical structure homeostasis;anterograde axonal transport;apoptotic process;auditory receptor cell stereocilium organization;axo-dendritic transport;axonal transport;behavior;biological regulation;biosynthetic process;cell death;cell projection organization;cellular biosynthetic process;cellular component organizati…	antioxidant activity;binding;catalytic activity;cation binding;copper ion binding;enzyme binding;GTPase binding;identical protein binding;ion binding;metal ion binding;oxidoreductase activity;oxidoreductase activity, acting on superoxide radicals as acceptor;phosphatase binding;protein binding;protein phosphatase 2B binding;protein phosphatase binding;protein-folding chaperone binding;small GTPas…	axon cytoplasm;cell body;cellular anatomical entity;cytoplasm;cytoplasmic region;cytoplasmic vesicle;cytosol;dendrite cytoplasm;dense core granule;extracellular region;extracellular space;intracellular membrane-bounded organelle;intracellular organelle;intracellular organelle lumen;intracellular vesicle;lysosome;lytic vacuole;membrane;membrane-bounded organelle;membrane-enclosed lumen;microbody;m…	Amyotrophic lateral sclerosis (ALS);Huntington's disease;Peroxisome;Prion diseases	0.0463078	0.896457	SOD1
P07901	P07901	Hsp90aa1	Hsp90aa1	Heat shock protein HSP 90-alpha	0.241735	0.484868	0.126893	0.377367	0.110938	2.04741	0.68422	0.34857	-0.52583	-2.25422	-0.634944	0.136585	-1.91959	0.128109	0.501706	0.146183	Cluster -360	activation of immune response;activation of innate immune response;anatomical structure morphogenesis;apoptotic process;aromatic compound biosynthetic process;axon extension;axonogenesis;biological process involved in interspecies interaction between organisms;biological regulation;biosynthetic process;cardiac muscle cell apoptotic process;cell death;cell growth;cell migration;cell motility;cell …	adenyl deoxyribonucleotide binding;adenyl nucleotide binding;adenyl ribonucleotide binding;anion binding;ATP binding;ATP hydrolysis activity;ATP-dependent activity;ATP-dependent protein folding chaperone;binding;carbohydrate derivative binding;catalytic activity;CTP binding;cytoskeletal protein binding;dATP binding;deoxyribonucleotide binding;disordered domain specific binding;DNA polymerase bind…	9+2 motile cilium;apical plasma membrane;axonal growth cone;basolateral plasma membrane;brush border membrane;cell body;cell projection;cell projection membrane;cell surface;cellular anatomical entity;cilium;collagen-containing extracellular matrix;cytoplasm;cytoplasmic vesicle;cytosol;dendrite terminus;dendritic growth cone;external encapsulating structure;extracellular matrix;growth cone;intrac…	Antigen processing and presentation;NOD-like receptor signaling pathway;Pathways in cancer;Plant-pathogen interaction;Progesterone-mediated oocyte maturation;Prostate cancer;Protein processing in endoplasmic reticulum	0.020911	-1.60545		HSP90AA1
P07901;P11499	P07901	Hsp90aa1;Hsp90ab1	Hsp90aa1	Heat shock protein HSP 90-alpha	0.0276669	0.428774	0.450008	0.412558	0.412558	1.81715	0.741209	0.253899	-0.607829	-2.34013	-0.632951	0.208462	-1.93348	-0.0375596	0.460465	0.339193	Cluster -360	activation of immune response;activation of innate immune response;anatomical structure morphogenesis;apoptotic process;aromatic compound biosynthetic process;axon extension;axonogenesis;biological process involved in interspecies interaction between organisms;biological regulation;biosynthetic process;cardiac muscle cell apoptotic process;cell death;cell growth;cell migration;cell motility;cell …	adenyl deoxyribonucleotide binding;adenyl nucleotide binding;adenyl ribonucleotide binding;anion binding;ATP binding;ATP hydrolysis activity;ATP-dependent activity;ATP-dependent protein folding chaperone;binding;carbohydrate derivative binding;catalytic activity;CTP binding;cytoskeletal protein binding;dATP binding;deoxyribonucleotide binding;disordered domain specific binding;DNA polymerase bind…	9+2 motile cilium;apical plasma membrane;axonal growth cone;basolateral plasma membrane;brush border membrane;cell body;cell projection;cell projection membrane;cell surface;cellular anatomical entity;cilium;collagen-containing extracellular matrix;cytoplasm;cytoplasmic vesicle;cytosol;dendrite terminus;dendritic growth cone;external encapsulating structure;extracellular matrix;growth cone;intrac…	Antigen processing and presentation;NOD-like receptor signaling pathway;Pathways in cancer;Plant-pathogen interaction;Progesterone-mediated oocyte maturation;Prostate cancer;Protein processing in endoplasmic reticulum	0.016917	-1.58321		HSP90AA1
Q6PDM2	Q6PDM2	Srsf1	Srsf1	Serine/arginine-rich splicing factor 1	1.19735	0.00283453	0.785476	0.707761	-0.125684	1.03788	0.667872	-0.330854	1.15379	-1.37793	-0.109392	-0.91563	-2.54701	0.15538	0.134309	-0.436151	Cluster -360	alternative mRNA splicing, via spliceosome;anatomical structure development;biological regulation;cardiac muscle contraction;cell surface receptor signaling pathway;cellular aromatic compound metabolic process;cellular component assembly;cellular component organization;cellular component organization or biogenesis;cellular localization;cellular macromolecule localization;cellular metabolic proces…	binding;DNA topoisomerase binding;enzyme binding;kinase binding;mRNA binding;nucleic acid binding;organic cyclic compound binding;protein binding;protein domain specific binding;protein kinase B binding;protein kinase binding;RNA binding;RS domain binding	catalytic complex;catalytic step 2 spliceosome;cellular anatomical entity;cytoplasm;intracellular membrane-bounded organelle;intracellular organelle;membrane-bounded organelle;nuclear body;nuclear protein-containing complex;nuclear speck;nucleoplasm;nucleus;organelle;protein-containing complex;ribonucleoprotein complex;spliceosomal complex	Spliceosome	0.0440533	-1.37454	SRSF1
Q8BMJ2	Q8BMJ2	Lars1	Lars1	Leucine--tRNA ligase, cytoplasmic	-0.643289	1.71418	0.72462	1.0061	1.00527	0.213294	1.44785	0.0418061	-1.23409	-0.438803	-1.93094	-0.439071	-0.74252	-0.579342	0.386833	-0.531908	Cluster -360	amino acid activation;amino acid metabolic process;biological regulation;carboxylic acid metabolic process;cell communication;cellular aromatic compound metabolic process;cellular component organization;cellular component organization or biogenesis;cellular metabolic process;cellular nitrogen compound metabolic process;cellular process;cellular response to acid chemical;cellular response to amino…	adenyl nucleotide binding;adenyl ribonucleotide binding;aminoacyl-tRNA editing activity;aminoacyl-tRNA ligase activity;anion binding;ATP binding;binding;carbohydrate derivative binding;carboxylic ester hydrolase activity;catalytic activity;catalytic activity, acting on a nucleic acid;catalytic activity, acting on a tRNA;catalytic activity, acting on RNA;enzyme activator activity;enzyme regulator …	aminoacyl-tRNA synthetase multienzyme complex;catalytic complex;cellular anatomical entity;cytoplasm;cytosol;endomembrane system;endoplasmic reticulum;intracellular membrane-bounded organelle;intracellular organelle;intracellular protein-containing complex;lysosome;lytic vacuole;membrane-bounded organelle;nuclear body;organelle;protein-containing complex;vacuole	Aminoacyl-tRNA biosynthesis;Valine, leucine and isoleucine biosynthesis	0.00200307	-1.42057
Q9CZX8	Q9CZX8	Rps19	Rps19	Small ribosomal subunit protein eS19	0.0573505	1.41224	0.205944	0.887893	0.420865	-0.283422	1.66435	0.308396	-1.04293	-0.513749	-2.07872	-0.550838	-0.989955	-0.514715	1.31808	-0.300799	Cluster -360	amide biosynthetic process;amide metabolic process;antimicrobial humoral immune response mediated by antimicrobial peptide;antimicrobial humoral response;biological process involved in interspecies interaction between organisms;biological regulation;biosynthetic process;cell chemotaxis;cell differentiation;cell killing;cell migration;cell motility;cell surface receptor signaling pathway;cellular …	binding;enzyme binding;fibroblast growth factor binding;growth factor binding;identical protein binding;kinase binding;nucleic acid binding;organic cyclic compound binding;protein binding;protein kinase binding;RNA binding;structural constituent of ribosome;structural molecule activity;translation initiation factor binding	cell junction;cellular anatomical entity;cytoplasm;cytosol;cytosolic ribosome;cytosolic small ribosomal subunit;intracellular non-membrane-bounded organelle;intracellular organelle;non-membrane-bounded organelle;nucleolus;nucleoplasm;organelle;postsynapse;postsynaptic density;postsynaptic specialization;preribosome;protein-containing complex;ribonucleoprotein complex;ribosomal subunit;ribosome;sm…	Ribosome	0.0133423	-1.44572
Q6ZWU9	Q6ZWU9	Rps27	Rps27	Small ribosomal subunit protein eS27	-0.467676	1.18448	0.585279	1.29677	1.00863	-0.584472	1.42747	-0.297906	-1.29152	-1.18246	-1.55696	-0.0198698	-0.23202	-1.15848	0.91975	0.368974	Cluster -360	amide biosynthetic process;amide metabolic process;biosynthetic process;cellular aromatic compound metabolic process;cellular biosynthetic process;cellular component assembly;cellular component biogenesis;cellular component organization;cellular component organization or biogenesis;cellular metabolic process;cellular nitrogen compound biosynthetic process;cellular nitrogen compound metabolic proc…	binding;cation binding;ion binding;metal ion binding;nucleic acid binding;organic cyclic compound binding;RNA binding;structural constituent of ribosome;structural molecule activity	cell junction;cellular anatomical entity;cytosol;cytosolic ribosome;cytosolic small ribosomal subunit;GABA-ergic synapse;glutamatergic synapse;intracellular membrane-bounded organelle;intracellular non-membrane-bounded organelle;intracellular organelle;membrane-bounded organelle;non-membrane-bounded organelle;nucleolus;nucleus;organelle;postsynapse;postsynaptic density;postsynaptic specialization…	Ribosome	0.0323068	-1.1222
P62911	P62911	Rpl32	Rpl32	Large ribosomal subunit protein eL32	-0.301441	0.96746	0.803212	1.01673	1.40875	0.483103	1.02012	0.338107	-1.24752	-0.593061	-1.09727	-2.02481	-1.21796	-0.174648	0.265896	0.353331	Cluster -360	amide biosynthetic process;amide metabolic process;biosynthetic process;cellular biosynthetic process;cellular metabolic process;cellular nitrogen compound biosynthetic process;cellular nitrogen compound metabolic process;cellular process;cytoplasmic translation;macromolecule biosynthetic process;macromolecule metabolic process;metabolic process;nitrogen compound metabolic process;organic substan…	structural constituent of ribosome;structural molecule activity	cell junction;cellular anatomical entity;cytoplasm;cytosol;cytosolic large ribosomal subunit;cytosolic ribosome;intracellular non-membrane-bounded organelle;intracellular organelle;large ribosomal subunit;non-membrane-bounded organelle;organelle;polysomal ribosome;postsynapse;presynapse;protein-containing complex;ribonucleoprotein complex;ribosomal subunit;ribosome;synapse	Ribosome	0.00103472	-3.03151
P47964	P47964	Rpl36	Rpl36	Large ribosomal subunit protein eL36	0.48206	1.02273	0.518031	1.00533	1.20586	0.457023	0.8699	0.168301	-1.13149	-1.50785	-1.77678	-1.24202	-1.01719	-0.1885	0.683987	0.450622	Cluster -360	amide biosynthetic process;amide metabolic process;biosynthetic process;cellular biosynthetic process;cellular metabolic process;cellular nitrogen compound biosynthetic process;cellular nitrogen compound metabolic process;cellular process;cytoplasmic translation;macromolecule biosynthetic process;macromolecule metabolic process;metabolic process;nitrogen compound metabolic process;organic substan…	structural constituent of ribosome;structural molecule activity	cell junction;cellular anatomical entity;cytoplasm;cytosol;cytosolic large ribosomal subunit;cytosolic ribosome;intracellular non-membrane-bounded organelle;intracellular organelle;large ribosomal subunit;non-membrane-bounded organelle;nucleolus;organelle;polysomal ribosome;postsynapse;presynapse;protein-containing complex;ribonucleoprotein complex;ribosomal subunit;ribosome;synapse	Ribosome	0.00105677	-2.9217
P61514	P61514	Rpl37a	Rpl37a	Large ribosomal subunit protein eL43	-0.312257	1.06431	0.825491	1.09848	1.32927	0.581513	1.09166	-0.715226	-1.01916	-0.579744	-1.83257	-1.55011	-0.342356	-0.5968	0.426113	0.531381	Cluster -360	amide biosynthetic process;amide metabolic process;biosynthetic process;cellular biosynthetic process;cellular metabolic process;cellular nitrogen compound biosynthetic process;cellular nitrogen compound metabolic process;cellular process;cytoplasmic translation;macromolecule biosynthetic process;macromolecule metabolic process;metabolic process;nitrogen compound metabolic process;organic substan…	binding;cation binding;ion binding;metal ion binding;structural constituent of ribosome;structural molecule activity	cell junction;cellular anatomical entity;cytoplasm;cytosol;cytosolic large ribosomal subunit;cytosolic ribosome;intracellular non-membrane-bounded organelle;intracellular organelle;large ribosomal subunit;non-membrane-bounded organelle;organelle;postsynapse;presynapse;protein-containing complex;ribonucleoprotein complex;ribosomal subunit;ribosome;synapse	Ribosome	0.00748648	-1.72014
Q8BML9	Q8BML9	Qars1	Qars1	Glutamine--tRNA ligase	-0.546553	0.997187	0.729881	1.61288	0.757931	0.233647	1.42308	0.216167	-0.527961	-0.416883	-2.02561	-1.63498	-0.158959	-0.769818	-0.0427888	0.15278	Cluster -360	amino acid activation;amino acid metabolic process;anatomical structure development;animal organ development;biological regulation;brain development;carboxylic acid metabolic process;cellular aromatic compound metabolic process;cellular metabolic process;cellular nitrogen compound metabolic process;cellular process;developmental process;glutaminyl-tRNA aminoacylation;heterocycle metabolic process…	adenyl nucleotide binding;adenyl ribonucleotide binding;aminoacyl-tRNA ligase activity;anion binding;ATP binding;binding;carbohydrate derivative binding;catalytic activity;catalytic activity, acting on a nucleic acid;catalytic activity, acting on a tRNA;catalytic activity, acting on RNA;enzyme binding;enzyme inhibitor activity;enzyme regulator activity;glutamine-tRNA ligase activity;heterocyclic …	aminoacyl-tRNA synthetase multienzyme complex;catalytic complex;cellular anatomical entity;cytoplasm;cytosol;intracellular protein-containing complex;protein-containing complex	Aminoacyl-tRNA biosynthesis	0.00252151	-1.42343
Q99020	Q99020	Hnrnpab	Hnrnpab	Heterogeneous nuclear ribonucleoprotein A/B	0.940038	0.83776	0.635631	0.501541	0.0952511	-1.11503	1.60764	0.386391	-0.856197	-1.04265	-2.01349	0.242742	-0.834601	0.264241	1.17826	-0.827534	Cluster -360	biological regulation;cell differentiation;cellular aromatic compound metabolic process;cellular developmental process;cellular metabolic process;cellular nitrogen compound metabolic process;cellular process;developmental process;epithelial to mesenchymal transition;heterocycle metabolic process;macromolecule metabolic process;macromolecule modification;mesenchymal cell differentiation;metabolic …	binding;DNA binding;double-stranded DNA binding;nucleic acid binding;organic cyclic compound binding;protein-containing complex binding;RNA binding;sequence-specific DNA binding;sequence-specific double-stranded DNA binding	catalytic complex;cell projection;cellular anatomical entity;cytoplasm;cytoplasmic ribonucleoprotein granule;cytosol;cytosolic region;dendrite;intracellular membrane-bounded organelle;intracellular non-membrane-bounded organelle;intracellular organelle;membrane-bounded organelle;messenger ribonucleoprotein complex;mRNA editing complex;neuron projection;neuronal ribonucleoprotein granule;non-membr…		0.047495	-1.63017
Q6ZWX6	Q6ZWX6	Eif2s1	Eif2s1	Eukaryotic translation initiation factor 2 subunit 1	-0.166888	0.813075	0.994074	0.655984	0.157135	0.119048	1.65907	0.651535	-0.421068	-1.00878	-2.22734	0.0461353	-1.51587	-0.158561	0.947738	-0.545278	Cluster -360	amide biosynthetic process;amide metabolic process;biological regulation;biosynthetic process;cell communication;cellular biosynthetic process;cellular component assembly;cellular component organization;cellular component organization or biogenesis;cellular metabolic process;cellular nitrogen compound biosynthetic process;cellular nitrogen compound metabolic process;cellular process;cellular resp…	binding;nucleic acid binding;organic cyclic compound binding;protein-containing complex binding;ribonucleoprotein complex binding;ribosome binding;RNA binding;translation factor activity, RNA binding;translation initiation factor activity;translation regulator activity;translation regulator activity, nucleic acid binding	astrocyte end-foot;astrocyte projection;cell junction;cell projection;cellular anatomical entity;cytoplasm;cytoplasmic ribonucleoprotein granule;cytoplasmic stress granule;cytosol;eukaryotic 48S preinitiation complex;eukaryotic translation initiation factor 2 complex;glial cell projection;glial limiting end-foot;intracellular membrane-bounded organelle;intracellular non-membrane-bounded organelle…	Hepatitis C;Measles;Protein processing in endoplasmic reticulum;RNA transport	0.00884889	-1.45237
P80313	P80313	Cct7	Cct7	T-complex protein 1 subunit eta	0.405425	0.667251	0.616379	0.569542	0.256088	0.107146	1.58214	0.346719	-0.77699	-0.956204	-2.64307	0.156936	-1.3013	0.284186	0.816116	-0.13036	Cluster -360	binding of sperm to zona pellucida;biological regulation;cell recognition;cell-cell recognition;cellular process;chaperone-mediated protein folding;establishment of localization;localization;positive regulation of biological process;positive regulation of biosynthetic process;positive regulation of cellular biosynthetic process;positive regulation of cellular component organization;positive regul…	adenyl nucleotide binding;adenyl ribonucleotide binding;anion binding;ATP binding;ATP hydrolysis activity;ATP-dependent activity;ATP-dependent protein folding chaperone;binding;carbohydrate derivative binding;catalytic activity;heterocyclic compound binding;hydrolase activity;hydrolase activity, acting on acid anhydrides;hydrolase activity, acting on acid anhydrides, in phosphorus-containing anhy…	cell body;cellular anatomical entity;chaperonin-containing T-complex;intracellular membrane-bounded organelle;intracellular organelle;intracellular protein-containing complex;membrane-bounded organelle;microtubule;mitochondrion;organelle;polymeric cytoskeletal fiber;protein folding chaperone complex;protein-containing complex;supramolecular complex;supramolecular fiber;supramolecular polymer		0.0167111	-1.70974
Q9CQ65	Q9CQ65	Mtap	Mtap	S-methyl-5'-thioadenosine phosphorylase	0.39823	0.59559	0.506579	0.764594	0.267802	-0.174958	1.53221	0.103923	-0.649583	-0.683125	-2.50053	-0.0836642	-1.4146	-0.360543	1.33048	0.3676	Cluster -360	alpha-amino acid biosynthetic process;alpha-amino acid metabolic process;amino acid biosynthetic process;amino acid metabolic process;amino acid salvage;aromatic compound biosynthetic process;aspartate family amino acid biosynthetic process;aspartate family amino acid metabolic process;biosynthetic process;carbohydrate derivative biosynthetic process;carbohydrate derivative metabolic process;carb…	catalytic activity;glycosyltransferase activity;pentosyltransferase activity;purine-nucleoside phosphorylase activity;S-methyl-5-thioadenosine phosphorylase activity;transferase activity	cellular anatomical entity;cytosol;nucleoplasm	Cysteine and methionine metabolism	0.0409247	-0.854128
Q8QZY1	Q8QZY1	Eif3l	Eif3l	Eukaryotic translation initiation factor 3 subunit L	0.164469	0.72004	0.640802	0.768895	0.284209	1.05452	1.45846	-0.216478	-2.06058	-0.969127	-2.08238	0.0230516	-0.213719	-0.345343	0.61024	0.162932	Cluster -360	cellular component assembly;cellular component organization;cellular component organization or biogenesis;cellular metabolic process;cellular process;formation of cytoplasmic translation initiation complex;metabolic process;protein-containing complex assembly;protein-containing complex organization;protein-RNA complex assembly;protein-RNA complex organization;translational initiation;viral proces…	binding;nucleic acid binding;organic cyclic compound binding;translation factor activity, RNA binding;translation initiation factor activity;translation regulator activity;translation regulator activity, nucleic acid binding	cell junction;cellular anatomical entity;eukaryotic 43S preinitiation complex;eukaryotic 48S preinitiation complex;eukaryotic translation initiation factor 3 complex;fibrillar center;intracellular non-membrane-bounded organelle;intracellular organelle;non-membrane-bounded organelle;nucleolus;nucleoplasm;organelle;protein-containing complex;ribonucleoprotein complex;synapse;translation preinitiati…		0.00899689	-2.04582
P26516	P26516	Psmd7	Psmd7	26S proteasome non-ATPase regulatory subunit 7	-0.24869	0.469223	0.720148	0.372165	0.664937	1.45827	0.783225	0.178404	-1.84089	-0.553944	-2.48564	0.337481	-0.723653	0.268047	0.097012	0.503903	Cluster -360	catabolic process;macromolecule catabolic process;macromolecule metabolic process;metabolic process;modification-dependent macromolecule catabolic process;modification-dependent protein catabolic process;nitrogen compound metabolic process;organic substance catabolic process;organic substance metabolic process;organonitrogen compound catabolic process;organonitrogen compound metabolic process;pri…	binding;catalytic activity;catalytic activity, acting on a protein;hydrolase activity;identical protein binding;metallopeptidase activity;peptidase activity;protein binding;protein dimerization activity;protein homodimerization activity	catalytic complex;cellular anatomical entity;endopeptidase complex;intracellular protein-containing complex;nucleoplasm;peptidase complex;proteasome complex;proteasome regulatory particle;protein-containing complex	Proteasome	0.0217885	-1.42554
Q9Z1Q9	Q9Z1Q9	Vars1	Vars1	Valine--tRNA ligase	0.0109081	0.936943	0.717887	0.319331	0.222714	1.16266	1.18339	0.519498	-1.81368	-0.871209	-2.22757	0.0246751	-1.02707	0.0457318	0.553295	0.242498	Cluster -360	amino acid activation;amino acid metabolic process;carboxylic acid metabolic process;cellular aromatic compound metabolic process;cellular metabolic process;cellular nitrogen compound metabolic process;cellular process;heterocycle metabolic process;macromolecule metabolic process;metabolic process;ncRNA metabolic process;nitrogen compound metabolic process;nucleic acid metabolic process;nucleobas…	adenyl nucleotide binding;adenyl ribonucleotide binding;aminoacyl-tRNA editing activity;aminoacyl-tRNA ligase activity;anion binding;ATP binding;binding;carbohydrate derivative binding;carboxylic ester hydrolase activity;catalytic activity;catalytic activity, acting on a nucleic acid;catalytic activity, acting on a tRNA;catalytic activity, acting on RNA;heterocyclic compound binding;hydrolase act…	cellular anatomical entity;cytosol;intracellular membrane-bounded organelle;intracellular organelle;membrane-bounded organelle;mitochondrion;organelle	Aminoacyl-tRNA biosynthesis;Valine, leucine and isoleucine biosynthesis	0.0058935	-1.66496
Q9DBZ5	Q9DBZ5	Eif3k	Eif3k	Eukaryotic translation initiation factor 3 subunit K	-0.149301	0.804428	0.6554	0.823531	0.785495	0.846423	1.46932	0.0847451	-1.48576	-0.451815	-2.49759	-0.107182	-0.671922	-0.522854	0.562415	-0.145341	Cluster -360	biological regulation;cellular component assembly;cellular component organization;cellular component organization or biogenesis;cellular metabolic process;cellular process;formation of cytoplasmic translation initiation complex;metabolic process;post-transcriptional regulation of gene expression;protein-containing complex assembly;protein-containing complex organization;protein-RNA complex assemb…	binding;nucleic acid binding;organic cyclic compound binding;protein-containing complex binding;ribonucleoprotein complex binding;ribosome binding;RNA binding;translation factor activity, RNA binding;translation initiation factor activity;translation regulator activity;translation regulator activity, nucleic acid binding	cellular anatomical entity;cytosol;eukaryotic 43S preinitiation complex;eukaryotic 48S preinitiation complex;eukaryotic translation initiation factor 3 complex;intracellular membrane-bounded organelle;intracellular organelle;membrane-bounded organelle;nucleus;organelle;protein-containing complex;ribonucleoprotein complex;translation preinitiation complex		0.00329347	-1.73704
Q9Z0N1	Q9Z0N1	Eif2s3x	Eif2s3x	Eukaryotic translation initiation factor 2 subunit 3, X-linked	0.21239	0.677486	0.658354	0.667026	0.429352	0.5809	1.55408	0.255167	-1.42685	-0.765006	-2.67009	0.243616	-0.755157	-0.229441	0.387256	0.180927	Cluster -360	cellular component assembly;cellular component organization;cellular component organization or biogenesis;cellular metabolic process;cellular process;formation of translation preinitiation complex;metabolic process;protein-containing complex assembly;protein-containing complex organization;protein-RNA complex assembly;protein-RNA complex organization;translational initiation	anion binding;binding;carbohydrate derivative binding;catalytic activity;GTP binding;GTPase activity;guanyl nucleotide binding;guanyl ribonucleotide binding;heterocyclic compound binding;hydrolase activity;hydrolase activity, acting on acid anhydrides;hydrolase activity, acting on acid anhydrides, in phosphorus-containing anhydrides;ion binding;nucleic acid binding;nucleoside phosphate binding;nu…	cell junction;cellular anatomical entity;cytoplasm;eukaryotic translation initiation factor 2 complex;protein-containing complex;synapse	RNA transport	0.00641748	-1.97319
Q9D0R2	Q9D0R2	Tars1	Tars1	Threonine--tRNA ligase 1, cytoplasmic	0.0816547	0.619056	0.576269	0.53772	0.778801	1.08446	1.18506	0.0364728	-1.38402	-0.810203	-2.54734	0.26116	-1.16246	-0.0532138	0.404456	0.392139	Cluster -360	amino acid activation;amino acid metabolic process;carboxylic acid metabolic process;cellular aromatic compound metabolic process;cellular metabolic process;cellular nitrogen compound metabolic process;cellular process;heterocycle metabolic process;macromolecule metabolic process;metabolic process;ncRNA metabolic process;nitrogen compound metabolic process;nucleic acid metabolic process;nucleobas…	adenyl nucleotide binding;adenyl ribonucleotide binding;aminoacyl-tRNA ligase activity;anion binding;ATP binding;binding;carbohydrate derivative binding;catalytic activity;catalytic activity, acting on a nucleic acid;catalytic activity, acting on a tRNA;catalytic activity, acting on RNA;cation binding;heterocyclic compound binding;identical protein binding;ion binding;ligase activity;ligase activ…	cellular anatomical entity;cytoplasm	Aminoacyl-tRNA biosynthesis	0.00855457	-2.16625
P14685	P14685	Psmd3	Psmd3	26S proteasome non-ATPase regulatory subunit 3	0.272045	0.650201	0.726627	0.640149	0.489772	1.26792	0.826142	0.568779	-0.856544	-0.967505	-2.63325	0.278702	-1.20427	0.260802	0.320413	-0.639984	Cluster -360	biological regulation;catabolic process;macromolecule catabolic process;macromolecule metabolic process;metabolic process;modification-dependent macromolecule catabolic process;modification-dependent protein catabolic process;nitrogen compound metabolic process;organic substance catabolic process;organic substance metabolic process;organonitrogen compound metabolic process;primary metabolic proce…	enzyme regulator activity;molecular function regulator activity	catalytic complex;endopeptidase complex;intracellular protein-containing complex;peptidase complex;proteasome accessory complex;proteasome complex;proteasome regulatory particle;proteasome regulatory particle, lid subcomplex;protein-containing complex	Proteasome	0.00240811	-1.63065
O88543	O88543	Cops3	Cops3	COP9 signalosome complex subunit 3	0.534096	0.666973	0.408293	0.612951	0.12083	1.19244	1.44472	0.416917	-1.33771	-0.734404	-2.35978	0.594118	-0.922574	-0.0578133	0.32588	-0.904927	Cluster -360	anatomical structure development;biological regulation;catabolic process;chordate embryonic development;developmental process;embryo development;embryo development ending in birth or egg hatching;in utero embryonic development;macromolecule catabolic process;macromolecule metabolic process;metabolic process;modification-dependent macromolecule catabolic process;modification-dependent protein cata…		cellular anatomical entity;COP9 signalosome;cytoplasm;cytosol;intracellular membrane-bounded organelle;intracellular organelle;membrane-bounded organelle;nuclear protein-containing complex;nucleoplasm;nucleus;organelle;perinuclear region of cytoplasm;protein-containing complex		0.00270586	-1.65324
Q3TXS7	Q3TXS7	Psmd1	Psmd1	26S proteasome non-ATPase regulatory subunit 1	0.111497	0.888883	0.460502	0.502344	0.423776	0.35572	1.02373	0.624168	-1.0529	0.0258385	-3.16486	0.148825	-0.4893	0.0811222	0.575184	-0.514535	Cluster -360	biological regulation;catabolic process;macromolecule catabolic process;macromolecule metabolic process;metabolic process;modification-dependent macromolecule catabolic process;modification-dependent protein catabolic process;nitrogen compound metabolic process;organic substance catabolic process;organic substance metabolic process;organonitrogen compound catabolic process;organonitrogen compound…	binding;enzyme binding;enzyme regulator activity;molecular function regulator activity;protein binding;ubiquitin protein ligase binding;ubiquitin-like protein ligase binding	catalytic complex;cellular anatomical entity;endopeptidase complex;intracellular membrane-bounded organelle;intracellular non-membrane-bounded organelle;intracellular organelle;intracellular protein-containing complex;membrane-bounded organelle;non-membrane-bounded organelle;nucleus;organelle;peptidase complex;proteasome accessory complex;proteasome complex;proteasome regulatory particle, base su…	Proteasome	0.0220487	-1.09695
Q9EPL8	Q9EPL8	Ipo7	Ipo7	Importin-7	-0.543119	0.901509	0.507474	0.723176	0.586671	1.28175	1.2806	0.144814	0.197092	-1.02007	-2.49233	-0.0986058	-1.31106	0.290216	0.136157	-0.584267	Cluster -360	biological process involved in interspecies interaction between organisms;biological regulation;cellular localization;cellular macromolecule localization;cellular process;defense response;defense response to other organism;establishment of localization;establishment of localization in cell;establishment of protein localization;establishment of protein localization to organelle;immune response;imm…	binding;enzyme binding;GTPase binding;histone binding;protein binding;SMAD binding;small GTPase binding	cellular anatomical entity;cytoplasm;cytosol;envelope;intracellular membrane-bounded organelle;intracellular organelle;membrane-bounded organelle;nuclear envelope;nucleoplasm;nucleus;organelle;organelle envelope		0.00885187	-1.32656
Q61937	Q61937	Npm1	Npm1	Nucleophosmin	0.445268	0.703539	1.1578	0.482834	-0.090137	1.28158	1.5856	0.219043	0.202673	-1.39872	-1.48321	-0.693182	-1.73772	-0.738335	0.402814	-0.339835	Cluster -360	aromatic compound biosynthetic process;biological regulation;biosynthetic process;cell cycle process;cell volume homeostasis;cellular aromatic compound metabolic process;cellular biosynthetic process;cellular component assembly;cellular component biogenesis;cellular component organization;cellular component organization or biogenesis;cellular homeostasis;cellular localization;cellular macromolecu…	adenyl nucleotide binding;adenyl ribonucleotide binding;anion binding;ATP binding;binding;carbohydrate derivative binding;chromatin binding;core promoter sequence-specific DNA binding;DNA binding;DNA-binding transcription factor binding;double-stranded DNA binding;enzyme binding;enzyme inhibitor activity;enzyme regulator activity;heterocyclic compound binding;histone binding;identical protein bin…	cellular anatomical entity;centrosome;cytoplasm;cytosol;granular component;intracellular membrane-bounded organelle;intracellular non-membrane-bounded organelle;intracellular organelle;large ribosomal subunit;membrane-bounded organelle;microtubule organizing center;non-membrane-bounded organelle;nuclear body;nuclear matrix;nuclear speck;nucleolus;nucleoplasm;nucleus;organelle;protein-containing c…		0.000885419	-2.20747
Q9CXW3	Q9CXW3	Cacybp	Cacybp	Calcyclin-binding protein	-0.265154	1.01655	0.752635	0.00338459	-0.288744	1.13353	1.47654	1.49836	-0.829844	-0.857033	-1.83377	-0.436623	-1.57494	-0.12925	0.22547	0.108888	Cluster -360	anatomical structure development;animal organ development;biological regulation;cardiac muscle cell differentiation;cardiocyte differentiation;cell differentiation;cellular developmental process;cellular process;cellular response to chemical stimulus;cellular response to cytokine stimulus;cellular response to leukemia inhibitory factor;cellular response to organic substance;cellular response to s…	binding;cytoskeletal protein binding;enzyme binding;identical protein binding;molecular adaptor activity;protein binding;protein dimerization activity;protein domain specific binding;protein homodimerization activity;S100 protein binding;tubulin binding;ubiquitin protein ligase binding;ubiquitin-like protein ligase binding	beta-catenin destruction complex;catalytic complex;cell body;cellular anatomical entity;cullin-RING ubiquitin ligase complex;cytoplasm;cytosol;intracellular membrane-bounded organelle;intracellular organelle;intracellular organelle lumen;intracellular protein-containing complex;membrane-bounded organelle;membrane-enclosed lumen;nuclear envelope lumen;nucleoplasm;nucleus;organelle;organelle envelo…	Wnt signaling pathway	0.0032358	-1.38811
P68040	P68040	Rack1	Rack1	Small ribosomal subunit protein RACK1	0.0725666	0.730153	1.25351	0.961551	0.616471	-0.333534	1.46647	-0.0139013	-1.34296	-1.03059	-1.45147	0.138775	-1.77495	-0.558207	0.81815	0.447953	Cluster -360	amide biosynthetic process;amide metabolic process;anatomical structure morphogenesis;biological regulation;biosynthetic process;carbohydrate homeostasis;cell cycle;cellular biosynthetic process;cellular component disassembly;cellular component organization;cellular component organization or biogenesis;cellular homeostasis;cellular localization;cellular macromolecule localization;cellular metabol…	BH domain binding;BH3 domain binding;binding;channel inhibitor activity;channel regulator activity;cyclin binding;cysteine-type endopeptidase activator activity involved in apoptotic process;cysteine-type endopeptidase regulator activity involved in apoptotic process;death domain binding;enzyme activator activity;enzyme binding;enzyme inhibitor activity;enzyme regulator activity;identical protein…	cell body;cell projection;cellular anatomical entity;cytoplasm;cytosol;dendrite;intracellular membrane-bounded organelle;intracellular organelle;IRE1-RACK1-PP2A complex;membrane-bounded organelle;midbody;mitochondrion;neuron projection;neuronal cell body;nucleoplasm;nucleus;organelle;perikaryon;perinuclear region of cytoplasm;phagocytic cup;plasma membrane bounded cell projection;protein-containi…	Measles	0.0114607	-1.73721
Q6ZWV7	Q6ZWV7	Rpl35	Rpl35	Large ribosomal subunit protein uL29	0.408593	0.997025	0.966088	1.02925	0.68966	-0.54451	1.17549	0.0587148	-1.31708	-1.47443	-1.54015	0.113417	-1.56101	-0.0574696	0.973934	0.0824793	Cluster -360	amide biosynthetic process;amide metabolic process;biosynthetic process;cellular aromatic compound metabolic process;cellular biosynthetic process;cellular metabolic process;cellular nitrogen compound biosynthetic process;cellular nitrogen compound metabolic process;cellular process;cytoplasmic translation;heterocycle metabolic process;macromolecule biosynthetic process;macromolecule metabolic pr…	binding;mRNA binding;nucleic acid binding;organic cyclic compound binding;protein-containing complex binding;ribonucleoprotein complex binding;RNA binding;structural constituent of ribosome;structural molecule activity	cell junction;cellular anatomical entity;cytoplasm;cytosol;cytosolic large ribosomal subunit;cytosolic ribosome;intracellular non-membrane-bounded organelle;intracellular organelle;large ribosomal subunit;non-membrane-bounded organelle;organelle;postsynapse;presynapse;protein-containing complex;ribonucleoprotein complex;ribosomal subunit;ribosome;synapse	Ribosome	0.0108723	-2.14366
Q920B9	Q920B9	Supt16h	Supt16h	FACT complex subunit SPT16	0.460819	0.316963	1.90194	0.58526	0.508272	-0.912828	1.10623	0.683691	0.848197	-0.327406	-1.81174	-0.737828	-1.54	-0.50294	0.210242	-0.788872	Cluster -360	aromatic compound biosynthetic process;biosynthetic process;cellular aromatic compound metabolic process;cellular biosynthetic process;cellular component assembly;cellular component disassembly;cellular component organization;cellular component organization or biogenesis;cellular metabolic process;cellular nitrogen compound biosynthetic process;cellular nitrogen compound metabolic process;cellula…	binding;chromatin binding;nucleosome binding;protein-containing complex binding	cellular anatomical entity;FACT complex;intracellular membrane-bounded organelle;intracellular organelle;membrane-bounded organelle;nuclear protein-containing complex;nucleoplasm;nucleus;organelle;protein-containing complex;transcription elongation factor complex		0.0139353	-1.57759	SUPT16H
Q8VIJ6;Q99K48	Q8VIJ6	Nono;Sfpq	Nono	Splicing factor, proline- and glutamine-rich	0.294018	0.482871	1.87157	0.723138	0.294018	-0.44374	1.04165	0.516966	-1.22582	-1.88402	-0.930364	-0.0268665	-1.56501	-0.238	0.567879	0.521725	Cluster -360	activation of immune response;activation of innate immune response;alternative mRNA splicing, via spliceosome;axo-dendritic transport;biological process involved in interspecies interaction between organisms;biological regulation;cellular aromatic compound metabolic process;cellular component organization;cellular component organization or biogenesis;cellular localization;cellular metabolic proce…	binding;chromatin binding;DNA binding;double-stranded DNA binding;enzyme binding;histone deacetylase binding;identical protein binding;nucleic acid binding;organic cyclic compound binding;protein binding;protein dimerization activity;protein homodimerization activity;protein-containing complex binding;RNA binding;sequence-specific DNA binding;sequence-specific double-stranded DNA binding;transcri…	cellular anatomical entity;chromatin;cytoplasm;cytoplasmic region;dendrite cytoplasm;intracellular membrane-bounded organelle;intracellular organelle;membrane-bounded organelle;neuron projection cytoplasm;nuclear body;nuclear matrix;nuclear protein-containing complex;nuclear speck;nucleoplasm;nucleus;organelle;paraspeckles;plasma membrane bounded cell projection cytoplasm;protein-containing compl…		0.0108686	-2.06446
Q8BG05	Q8BG05	Hnrnpa3	Hnrnpa3	Heterogeneous nuclear ribonucleoprotein A3	0.700816	0.76255	1.86605	0.881906	0.610208	-1.5921	0.509017	0.405433	-1.41708	-0.230998	-1.44218	-0.488971	-1.22172	-0.115454	0.661989	0.110538	Cluster -360	cellular aromatic compound metabolic process;cellular metabolic process;cellular nitrogen compound metabolic process;cellular process;establishment of localization;establishment of RNA localization;heterocycle metabolic process;localization;macromolecule metabolic process;metabolic process;mRNA metabolic process;mRNA processing;mRNA splicing, via spliceosome;mRNA transport;nitrogen compound metab…	binding;macromolecule transmembrane transporter activity;mRNA 3'-UTR binding;mRNA binding;nucleic acid binding;nucleic acid transmembrane transporter activity;nucleobase-containing compound transmembrane transporter activity;organic cyclic compound binding;RNA binding;RNA transmembrane transporter activity;transmembrane transporter activity;transporter activity	catalytic complex;catalytic step 2 spliceosome;cell junction;cellular anatomical entity;glutamatergic synapse;intracellular membrane-bounded organelle;intracellular non-membrane-bounded organelle;intracellular organelle;membrane-bounded organelle;messenger ribonucleoprotein complex;non-membrane-bounded organelle;nuclear protein-containing complex;nucleus;organelle;postsynapse;postsynaptic density…	Spliceosome	0.0327402	-1.87026
P49312;Q8BG05	P49312	Hnrnpa1;Hnrnpa3	Hnrnpa1	Heterogeneous nuclear ribonucleoprotein A1	0.404769	0.775104	1.74333	0.777785	0.386266	-0.654648	0.563351	0.440365	-2.00311	-0.989148	-1.58191	0.174318	-1.11527	-0.0398556	0.791038	0.327622	Cluster -360	alternative mRNA splicing, via spliceosome;biological regulation;cellular aromatic compound metabolic process;cellular localization;cellular metabolic process;cellular nitrogen compound metabolic process;cellular process;cellular response to arsenic-containing substance;cellular response to chemical stimulus;cellular response to inorganic substance;cellular response to metal ion;cellular response…	annealing activity;binding;DNA binding;DNA/DNA annealing activity;G-rich strand telomeric DNA binding;identical protein binding;miRNA binding;molecular adaptor activity;molecular condensate scaffold activity;mRNA 3'-UTR binding;mRNA binding;nucleic acid binding;organic cyclic compound binding;pre-mRNA binding;protein binding;protein domain specific binding;protein-macromolecule adaptor activity;r…	catalytic complex;catalytic step 2 spliceosome;cell junction;cellular anatomical entity;cytoplasm;intracellular membrane-bounded organelle;intracellular non-membrane-bounded organelle;intracellular organelle;membrane-bounded organelle;non-membrane-bounded organelle;nuclear protein-containing complex;nucleoplasm;nucleoplasmic periphery of the nuclear pore complex;nucleus;organelle;protein-containi…	Spliceosome	0.020407	-2.29096
Q8VIJ6	Q8VIJ6	Sfpq	Sfpq	Splicing factor, proline- and glutamine-rich	0.422151	0.567924	1.99987	0.770138	0.220494	-1.31506	1.34558	0.206264	-1.67725	-0.501405	-0.873592	-0.371904	-1.34909	-0.295844	0.565908	0.285815	Cluster -360	activation of immune response;activation of innate immune response;alternative mRNA splicing, via spliceosome;axo-dendritic transport;biological process involved in interspecies interaction between organisms;biological regulation;cellular aromatic compound metabolic process;cellular component organization;cellular component organization or biogenesis;cellular localization;cellular metabolic proce…	binding;chromatin binding;DNA binding;double-stranded DNA binding;enzyme binding;histone deacetylase binding;identical protein binding;nucleic acid binding;organic cyclic compound binding;protein binding;protein dimerization activity;protein homodimerization activity;protein-containing complex binding;RNA binding;sequence-specific DNA binding;sequence-specific double-stranded DNA binding;transcri…	cellular anatomical entity;chromatin;cytoplasm;cytoplasmic region;dendrite cytoplasm;intracellular membrane-bounded organelle;intracellular organelle;membrane-bounded organelle;neuron projection cytoplasm;nuclear body;nuclear matrix;nuclear protein-containing complex;nuclear speck;nucleoplasm;nucleus;organelle;paraspeckles;plasma membrane bounded cell projection cytoplasm;protein-containing compl…		0.029215	-1.77072
Q9Z1N5	Q9Z1N5	Ddx39b	Ddx39b	Spliceosome RNA helicase Ddx39b	0.198594	0.604628	1.98063	0.697179	0.328452	-0.792733	0.961728	0.232409	-2.39863	-0.521152	-0.800237	0.190722	-1.12239	-0.396992	0.437641	0.400154	Cluster -360	biological process involved in interaction with host;biological process involved in interspecies interaction between organisms;biological process involved in symbiotic interaction;biological regulation;cellular aromatic compound metabolic process;cellular component assembly;cellular component organization;cellular component organization or biogenesis;cellular localization;cellular metabolic proce…	adenyl nucleotide binding;adenyl ribonucleotide binding;anion binding;ATP binding;ATP hydrolysis activity;ATP-dependent activity;ATP-dependent activity, acting on RNA;ATP-dependent protein binding;binding;carbohydrate derivative binding;catalytic activity;catalytic activity, acting on a nucleic acid;catalytic activity, acting on RNA;helicase activity;heterocyclic compound binding;hydrolase activi…	cellular anatomical entity;cytoplasm;intracellular membrane-bounded organelle;intracellular organelle;membrane-bounded organelle;nuclear body;nuclear matrix;nuclear protein-containing complex;nuclear speck;nucleus;organelle;protein-containing complex;ribonucleoprotein complex;small nuclear ribonucleoprotein complex;Sm-like protein family complex;spliceosomal complex;spliceosomal snRNP complex;tra…	mRNA surveillance pathway;RNA transport;Spliceosome	0.0295132	-1.69542
Q9CR67	Q9CR67	Tmem33	Tmem33	Transmembrane protein 33	0.452961	1.06686	1.41725	0.566275	1.13938	-0.0944736	0.00679417	-0.291371	-1.56488	-0.0136906	-1.74972	0.345899	-1.88939	-0.427403	0.426916	0.608595	Cluster -360	biological process involved in interspecies interaction between organisms;biological regulation;cellular component organization;cellular component organization or biogenesis;cellular process;cellular response to stimulus;cellular response to stress;defense response;defense response to other organism;endoplasmic reticulum organization;endoplasmic reticulum tubular network organization;immune respo…		cellular anatomical entity;cytoplasmic vesicle;endoplasmic reticulum;endoplasmic reticulum membrane;envelope;intracellular membrane-bounded organelle;intracellular organelle;intracellular vesicle;melanosome;membrane;membrane-bounded organelle;nuclear envelope;organelle;organelle envelope;organelle membrane;pigment granule;vesicle		0.0271464	-0.962015
Q922Q8	Q922Q8	Lrrc59	Lrrc59	Leucine-rich repeat-containing protein 59	0.0881759	0.422827	1.39018	0.501841	1.361	-0.216444	0.70357	-0.224462	-2.13164	-0.369124	-2.09877	-0.0036128	-0.3266	-0.302518	0.307353	0.898219	Cluster -360			cellular anatomical entity;endoplasmic reticulum;endoplasmic reticulum membrane;envelope;intracellular membrane-bounded organelle;intracellular non-membrane-bounded organelle;intracellular organelle;membrane;membrane-bounded organelle;mitochondrial nucleoid;non-membrane-bounded organelle;nuclear envelope;nucleoid;organelle;organelle envelope;organelle membrane		0.0390197	-1.3033
P16381	P16381	D1Pas1	D1Pas1	Putative ATP-dependent RNA helicase Pl10	-0.174161	0.992774	1.25233	0.642803	1.11787	-0.104623	0.33999	0.0166158	-1.99226	-0.77306	-2.05186	0.0774733	-0.744945	-0.117736	0.513345	1.00545	Cluster -360	apoptotic signaling pathway;biological process involved in interspecies interaction between organisms;biological regulation;cell cycle process;cell differentiation;cell surface receptor signaling pathway;cellular aromatic compound metabolic process;cellular component assembly;cellular component organization;cellular component organization or biogenesis;cellular developmental process;cellular loca…	adenyl nucleotide binding;adenyl ribonucleotide binding;anion binding;annealing activity;ATP binding;ATP hydrolysis activity;ATP-dependent activity;ATP-dependent activity, acting on DNA;ATP-dependent activity, acting on RNA;binding;carbohydrate derivative binding;catalytic activity;catalytic activity, acting on a nucleic acid;catalytic activity, acting on DNA;catalytic activity, acting on RNA;CTP…	cell leading edge;cellular anatomical entity;centrosome;cytoplasm;cytoplasmic ribonucleoprotein granule;cytoplasmic stress granule;cytosol;intracellular membrane-bounded organelle;intracellular non-membrane-bounded organelle;intracellular organelle;membrane;membrane-bounded organelle;microtubule organizing center;non-membrane-bounded organelle;nucleoplasm;nucleus;organelle;P granule;plasma membra…	RIG-I-like receptor signaling pathway	0.0358667	-1.60282
P62830	P62830	Rpl23	Rpl23	Large ribosomal subunit protein uL14	-0.258325	0.877191	0.749291	0.913867	1.31327	-0.165558	0.846793	0.031253	-2.27396	-0.41197	-2.00405	0.106052	-0.156437	-0.574353	0.319521	0.68742	Cluster -360	amide biosynthetic process;amide metabolic process;biological regulation;biosynthetic process;cell cycle process;cellular biosynthetic process;cellular component disassembly;cellular component organization;cellular component organization or biogenesis;cellular metabolic process;cellular nitrogen compound biosynthetic process;cellular nitrogen compound metabolic process;cellular process;cellular r…	binding;enzyme binding;enzyme inhibitor activity;enzyme regulator activity;large ribosomal subunit rRNA binding;molecular function inhibitor activity;molecular function regulator activity;nucleic acid binding;organic cyclic compound binding;protein binding;RNA binding;rRNA binding;structural constituent of ribosome;structural molecule activity;transcription coactivator binding;transcription coreg…	cell junction;cellular anatomical entity;cytoplasm;cytosol;cytosolic large ribosomal subunit;cytosolic ribosome;intracellular non-membrane-bounded organelle;intracellular organelle;large ribosomal subunit;non-membrane-bounded organelle;nucleolus;nucleoplasm;organelle;postsynapse;postsynaptic density;postsynaptic specialization;presynapse;protein-containing complex;ribonucleoprotein complex;riboso…	Ribosome	0.0252825	-1.63579
P51410	P51410	Rpl9	Rpl9	Large ribosomal subunit protein uL6	0.0565433	0.410853	0.924534	0.917824	1.06176	0.436567	0.616054	0.0794761	-2.22641	-0.524762	-2.17665	0.349627	-0.579348	-0.526786	0.479585	0.701132	Cluster -360	amide biosynthetic process;amide metabolic process;biosynthetic process;cellular biosynthetic process;cellular metabolic process;cellular nitrogen compound biosynthetic process;cellular nitrogen compound metabolic process;cellular process;cytoplasmic translation;macromolecule biosynthetic process;macromolecule metabolic process;metabolic process;nitrogen compound metabolic process;organic substan…	binding;nucleic acid binding;organic cyclic compound binding;RNA binding;rRNA binding;structural constituent of ribosome;structural molecule activity	cell junction;cellular anatomical entity;cytoplasm;cytosol;cytosolic large ribosomal subunit;cytosolic ribosome;intracellular non-membrane-bounded organelle;intracellular organelle;large ribosomal subunit;non-membrane-bounded organelle;organelle;postsynapse;presynapse;protein-containing complex;ribonucleoprotein complex;ribosomal subunit;ribosome;synapse	Ribosome	0.0181632	-2.12354
Q8R326;Q99K48	Q8R326	Nono;Pspc1	Nono	Paraspeckle component 1	0.123405	0.542149	1.44831	0.407438	0.604836	0.348585	0.474096	0.415126	-1.86425	-0.892684	-2.09139	0.46696	-0.881802	-0.740684	0.757913	0.881994	Cluster -360	activation of immune response;activation of innate immune response;biological process involved in interspecies interaction between organisms;biological regulation;defense response;defense response to other organism;immune response;immune system process;innate immune response;negative regulation of biological process;negative regulation of biosynthetic process;negative regulation of cellular biosy…	binding;nucleic acid binding;organic cyclic compound binding;RNA binding	cellular anatomical entity;cytoplasm;fibrillar center;intracellular membrane-bounded organelle;intracellular organelle;membrane-bounded organelle;nuclear body;nuclear matrix;nuclear speck;nucleoplasm;nucleus;organelle;paraspeckles		0.0230532	-1.97801
Q5XJY5	Q5XJY5	Arcn1	Arcn1	Coatomer subunit delta	-0.576101	0.860546	1.03522	1.16299	0.967805	0.00111583	0.68208	0.0856211	-1.874	-1.227	-1.44178	0.185965	-1.24017	-0.267709	0.820857	0.82456	Cluster -360	adult behavior;adult locomotory behavior;anatomical structure maturation;behavior;cellular localization;cellular macromolecule localization;cellular process;cerebellar Purkinje cell layer maturation;developmental maturation;developmental process;endoplasmic reticulum to Golgi vesicle-mediated transport;establishment of localization;establishment of localization in cell;establishment of protein lo…		bounding membrane of organelle;cellular anatomical entity;coated vesicle;COPI vesicle coat;COPI-coated vesicle;cytoplasmic vesicle;endoplasmic reticulum;Golgi apparatus;Golgi membrane;Golgi-associated vesicle;intracellular membrane-bounded organelle;intracellular organelle;intracellular vesicle;membrane;membrane coat;membrane protein complex;membrane-bounded organelle;organelle;organelle membrane…		0.0291267	-1.25859
P63323	P63323	Rps12	Rps12	Small ribosomal subunit protein eS12	-0.185805	0.640209	1.06778	0.916946	0.623384	-0.119211	1.22282	0.281602	-2.35308	-1.33409	-1.2333	0.104343	-0.709455	-0.387951	0.833975	0.631838	Cluster -360	amide biosynthetic process;amide metabolic process;biological regulation;biosynthetic process;cellular biosynthetic process;cellular component biogenesis;cellular component organization or biogenesis;cellular metabolic process;cellular nitrogen compound biosynthetic process;cellular nitrogen compound metabolic process;cellular process;cytoplasmic translation;macromolecule biosynthetic process;mac…	structural constituent of ribosome;structural molecule activity	cell junction;cellular anatomical entity;cytoplasm;cytosol;cytosolic large ribosomal subunit;cytosolic ribosome;cytosolic small ribosomal subunit;Golgi apparatus;intracellular membrane-bounded organelle;intracellular non-membrane-bounded organelle;intracellular organelle;large ribosomal subunit;membrane-bounded organelle;non-membrane-bounded organelle;nucleolus;organelle;postsynapse;preribosome;p…	Ribosome	0.0200125	-1.81609
P62082	P62082	Rps7	Rps7	Small ribosomal subunit protein eS7	-0.0455327	0.626722	1.18023	0.832769	0.886412	-0.0871108	0.868947	-0.00205137	-2.27452	-0.0339166	-1.59714	0.147507	-1.45173	-0.420572	0.696233	0.673758	Cluster -360	amide biosynthetic process;amide metabolic process;anatomical structure formation involved in morphogenesis;biological regulation;biosynthetic process;cell differentiation;cellular aromatic compound metabolic process;cellular biosynthetic process;cellular component biogenesis;cellular component organization or biogenesis;cellular developmental process;cellular metabolic process;cellular nitrogen …	binding;enzyme binding;enzyme inhibitor activity;enzyme regulator activity;kinase binding;molecular function inhibitor activity;molecular function regulator activity;mRNA 3'-UTR binding;mRNA 5'-UTR binding;mRNA binding;nucleic acid binding;organic cyclic compound binding;poly(U) RNA binding;poly-pyrimidine tract binding;protein binding;protein kinase binding;RNA binding;single-stranded RNA bindin…	cell junction;cellular anatomical entity;centrosome;cytoplasm;cytosol;cytosolic ribosome;cytosolic small ribosomal subunit;endoplasmic reticulum;intracellular membrane-bounded organelle;intracellular non-membrane-bounded organelle;intracellular organelle;membrane-bounded organelle;microtubule organizing center;non-membrane-bounded organelle;nucleolus;nucleus;organelle;postsynapse;preribosome;prot…	Ribosome	0.0272895	-2.01103
Q6ZWU9;Q6ZWY3	Q6ZWU9	Rps27;Rps27l	Rps27	Small ribosomal subunit protein eS27	-0.0360453	0.866165	1.05265	0.927077	0.737698	-0.128199	1.13662	0.149232	-2.32938	-0.365151	-1.3792	-0.140583	-1.39549	-0.37737	0.559538	0.722433	Cluster -360	amide biosynthetic process;amide metabolic process;biosynthetic process;cellular aromatic compound metabolic process;cellular biosynthetic process;cellular component assembly;cellular component biogenesis;cellular component organization;cellular component organization or biogenesis;cellular metabolic process;cellular nitrogen compound biosynthetic process;cellular nitrogen compound metabolic proc…	binding;cation binding;ion binding;metal ion binding;nucleic acid binding;organic cyclic compound binding;RNA binding;structural constituent of ribosome;structural molecule activity	cell junction;cellular anatomical entity;cytosol;cytosolic ribosome;cytosolic small ribosomal subunit;GABA-ergic synapse;glutamatergic synapse;intracellular membrane-bounded organelle;intracellular non-membrane-bounded organelle;intracellular organelle;membrane-bounded organelle;non-membrane-bounded organelle;nucleolus;nucleus;organelle;postsynapse;postsynaptic density;postsynaptic specialization…	Ribosome	0.0125695	-1.86697
P60867	P60867	Rps20	Rps20	Small ribosomal subunit protein uS10	-0.0716153	0.762841	1.24498	0.817274	0.838977	-0.269128	1.05407	0.0606144	-2.00707	-0.731948	-1.12812	-0.0585631	-1.77767	-0.283228	0.884881	0.663703	Cluster -360	amide biosynthetic process;amide metabolic process;biological regulation;biosynthetic process;cellular biosynthetic process;cellular metabolic process;cellular nitrogen compound biosynthetic process;cellular nitrogen compound metabolic process;cellular process;cytoplasmic translation;macromolecule biosynthetic process;macromolecule metabolic process;metabolic process;nitrogen compound metabolic p…	binding;enzyme inhibitor activity;enzyme regulator activity;MDM2/MDM4 family protein binding;molecular function inhibitor activity;molecular function regulator activity;nucleic acid binding;organic cyclic compound binding;protein binding;RNA binding;structural constituent of ribosome;structural molecule activity;ubiquitin ligase inhibitor activity;ubiquitin-protein transferase inhibitor activity;…	cell junction;cellular anatomical entity;cytoplasm;cytosol;cytosolic ribosome;cytosolic small ribosomal subunit;intracellular non-membrane-bounded organelle;intracellular organelle;non-membrane-bounded organelle;organelle;postsynapse;protein-containing complex;ribonucleoprotein complex;ribosomal subunit;ribosome;small ribosomal subunit;synapse	Ribosome	0.0203481	-1.85789
Q99LF4	Q99LF4	Rtcb	Rtcb	RNA-splicing ligase RtcB homolog	-0.1676	1.24079	1.2068	0.723473	0.797638	-1.06572	1.17673	-0.0588271	-1.79643	-1.07975	-1.59153	-0.123434	-0.422569	-0.307827	0.730445	0.737805	Cluster -360	anatomical structure development;animal organ development;cellular aromatic compound metabolic process;cellular metabolic process;cellular nitrogen compound metabolic process;cellular process;chordate embryonic development;developmental process;embryo development;embryo development ending in birth or egg hatching;heterocycle metabolic process;in utero embryonic development;macromolecule metabolic…	anion binding;binding;carbohydrate derivative binding;catalytic activity;catalytic activity, acting on a nucleic acid;catalytic activity, acting on RNA;cation binding;cytoskeletal protein binding;GTP binding;guanyl nucleotide binding;guanyl ribonucleotide binding;heterocyclic compound binding;ion binding;ligase activity;ligase activity, forming phosphoric ester bonds;metal ion binding;nucleoside …	catalytic complex;cellular anatomical entity;cytoplasm;cytosol;endoplasmic reticulum membrane;envelope;intracellular membrane-bounded organelle;intracellular organelle;intracellular protein-containing complex;membrane;membrane-bounded organelle;nuclear envelope;nucleoplasm;nucleus;organelle;organelle envelope;organelle membrane;protein-containing complex;tRNA-splicing ligase complex		0.0499212	-1.11266
Q91VR5	Q91VR5	Ddx1	Ddx1	ATP-dependent RNA helicase DDX1	-0.152627	1.08968	1.43701	0.824982	0.636299	-1.03377	1.03317	0.217683	-1.95303	-0.278648	-1.37351	-0.311469	-0.965584	-0.643883	1.0079	0.465802	Cluster -360	biological process involved in interspecies interaction between organisms;biological regulation;cellular aromatic compound metabolic process;cellular component organization;cellular component organization or biogenesis;cellular localization;cellular macromolecule localization;cellular metabolic process;cellular nitrogen compound metabolic process;cellular process;cellular response to stimulus;cel…	adenyl nucleotide binding;adenyl ribonucleotide binding;anion binding;ATP binding;ATP hydrolysis activity;ATP-dependent activity;ATP-dependent activity, acting on DNA;ATP-dependent activity, acting on RNA;binding;carbohydrate derivative binding;catalytic activity;catalytic activity, acting on a nucleic acid;catalytic activity, acting on DNA;catalytic activity, acting on RNA;chromatin binding;DNA …	catalytic complex;cellular anatomical entity;cleavage body;cytoplasm;cytoplasmic ribonucleoprotein granule;cytoplasmic stress granule;cytosol;intracellular membrane-bounded organelle;intracellular non-membrane-bounded organelle;intracellular organelle;intracellular protein-containing complex;membrane-bounded organelle;mitochondrion;non-membrane-bounded organelle;nuclear body;nucleoplasm;nucleus;o…		0.0375685	-1.27671
P17225	P17225	Ptbp1	Ptbp1	Polypyrimidine tract-binding protein 1	-0.511735	0.891995	1.95303	1.05328	0.557911	-0.768141	0.814406	-0.117309	-1.53464	-0.702874	-1.56664	0.0446527	-0.858164	-0.607794	0.91588	0.436146	Cluster -360	3'-UTR-mediated mRNA stabilization;aromatic compound catabolic process;biological regulation;biosynthetic process;catabolic process;cell differentiation;cellular aromatic compound metabolic process;cellular biosynthetic process;cellular catabolic process;cellular developmental process;cellular metabolic process;cellular nitrogen compound catabolic process;cellular nitrogen compound metabolic proc…	binding;catalytic activity;catalytic activity, acting on a nucleic acid;catalytic activity, acting on DNA;DNA binding;DNA endonuclease activity;DNA nuclease activity;endonuclease activity;hydrolase activity;hydrolase activity, acting on ester bonds;mRNA binding;nuclease activity;nucleic acid binding;organic cyclic compound binding;pre-mRNA binding;regulatory region RNA binding;RNA binding;sequenc…	cellular anatomical entity;intracellular membrane-bounded organelle;intracellular organelle;membrane-bounded organelle;neuron projection terminus;nucleus;organelle		0.0485498	-1.6477
Q501J6;Q61656	Q501J6	Ddx17;Ddx5	Ddx17	Probable ATP-dependent RNA helicase DDX17	0.442031	0.594986	1.8008	0.682141	0.959888	-0.559166	0.620342	0.235541	-1.77321	-0.142559	-2.21097	-0.783046	-0.272429	-0.262821	0.466822	0.201654	Cluster -360	alternative mRNA splicing, via spliceosome;androgen receptor signaling pathway;aromatic compound biosynthetic process;biological process involved in interspecies interaction between organisms;biological regulation;biosynthetic process;cell differentiation;cellular aromatic compound metabolic process;cellular biosynthetic process;cellular developmental process;cellular metabolic process;cellular n…	adenyl nucleotide binding;adenyl ribonucleotide binding;anion binding;ATP binding;ATP hydrolysis activity;ATP-dependent activity;ATP-dependent activity, acting on RNA;binding;carbohydrate derivative binding;catalytic activity;catalytic activity, acting on a nucleic acid;catalytic activity, acting on RNA;chromatin binding;chromatin DNA binding;DNA binding;helicase activity;heterocyclic compound bi…	cellular anatomical entity;cytoplasm;cytosol;intracellular membrane-bounded organelle;intracellular non-membrane-bounded organelle;intracellular organelle;membrane-bounded organelle;non-membrane-bounded organelle;nuclear body;nuclear speck;nucleolus;nucleus;organelle;protein-containing complex;ribonucleoprotein complex		0.0109524	-1.87403
O08810	O08810	Eftud2	Eftud2	116 kDa U5 small nuclear ribonucleoprotein component	0.1704	0.510278	2.05815	0.890532	0.291582	-0.654807	1.53696	0.412585	-1.6775	0.248444	-1.45411	-0.415481	-0.670565	-0.839612	0.139459	-0.546309	Cluster -360	cellular aromatic compound metabolic process;cellular metabolic process;cellular nitrogen compound metabolic process;cellular process;heterocycle metabolic process;macromolecule metabolic process;metabolic process;mRNA metabolic process;mRNA processing;mRNA splicing, via spliceosome;nitrogen compound metabolic process;nucleic acid metabolic process;nucleobase-containing compound metabolic process…	anion binding;binding;carbohydrate derivative binding;catalytic activity;GTP binding;GTPase activity;guanyl nucleotide binding;guanyl ribonucleotide binding;heterocyclic compound binding;hydrolase activity;hydrolase activity, acting on acid anhydrides;hydrolase activity, acting on acid anhydrides, in phosphorus-containing anhydrides;ion binding;nucleic acid binding;nucleoside phosphate binding;nu…	Cajal body;catalytic complex;catalytic step 2 spliceosome;cellular anatomical entity;cytosol;intracellular membrane-bounded organelle;intracellular organelle;membrane-bounded organelle;nuclear body;nuclear protein-containing complex;nuclear speck;nucleoplasm;nucleus;organelle;precatalytic spliceosome;protein-containing complex;ribonucleoprotein complex;small nuclear ribonucleoprotein complex;Sm-l…	Spliceosome	0.00424748	-1.23736
O35286	O35286	Dhx15	Dhx15	ATP-dependent RNA helicase DHX15	0.0686338	1.01547	1.62464	0.777023	0.370299	-0.837166	1.24177	0.144431	-1.5745	0.644441	-1.84691	-0.787846	-0.69148	-0.699199	0.646308	-0.095915	Cluster -360	antiviral innate immune response;biological process involved in interspecies interaction between organisms;biological regulation;cellular aromatic compound metabolic process;cellular metabolic process;cellular nitrogen compound metabolic process;cellular process;defense response;defense response to bacterium;defense response to other organism;defense response to symbiont;defense response to virus…	adenyl nucleotide binding;adenyl ribonucleotide binding;anion binding;ATP binding;ATP hydrolysis activity;ATP-dependent activity;ATP-dependent activity, acting on RNA;binding;carbohydrate derivative binding;catalytic activity;catalytic activity, acting on a nucleic acid;catalytic activity, acting on RNA;double-stranded RNA binding;helicase activity;heterocyclic compound binding;hydrolase activity…	cellular anatomical entity;intracellular non-membrane-bounded organelle;intracellular organelle;non-membrane-bounded organelle;nuclear body;nuclear protein-containing complex;nuclear speck;nucleolus;organelle;post-mRNA release spliceosomal complex;protein-containing complex;ribonucleoprotein complex;spliceosomal complex;U12-type spliceosomal complex;U2-type post-mRNA release spliceosomal complex;…	Spliceosome	0.0215179	-1.53365
Q61656	Q61656	Ddx5	Ddx5	Probable ATP-dependent RNA helicase DDX5	-0.203619	0.509815	2.2017	0.469511	1.31374	-1.1312	0.759077	0.402124	-1.55488	-0.101082	-1.24725	-0.575129	-0.880934	-0.494862	-0.186288	0.719284	Cluster -360	alternative mRNA splicing, via spliceosome;androgen receptor signaling pathway;apoptotic signaling pathway;aromatic compound biosynthetic process;aromatic compound catabolic process;biological regulation;biosynthetic process;BMP signaling pathway;catabolic process;cell differentiation;cell surface receptor signaling pathway;cellular aromatic compound metabolic process;cellular biosynthetic proces…	adenyl nucleotide binding;adenyl ribonucleotide binding;anion binding;ATP binding;ATP hydrolysis activity;ATP-dependent activity;ATP-dependent activity, acting on RNA;binding;calcium-dependent protein binding;calmodulin binding;carbohydrate derivative binding;catalytic activity;catalytic activity, acting on a nucleic acid;catalytic activity, acting on RNA;chromatin binding;DNA-binding transcripti…	catalytic complex;catalytic step 2 spliceosome;cellular anatomical entity;cytoplasm;intracellular membrane-bounded organelle;intracellular non-membrane-bounded organelle;intracellular organelle;membrane-bounded organelle;non-membrane-bounded organelle;nuclear body;nuclear protein-containing complex;nuclear speck;nucleolus;nucleoplasm;nucleus;organelle;protein-containing complex;ribonucleoprotein …		0.0247376	-1.55463
Q62318	Q62318	Trim28	Trim28	Transcription intermediary factor 1-beta	0.010572	0.716153	1.88653	0.830621	0.903396	-0.553915	0.802913	0.377943	-0.950858	-0.700289	-2.28649	-0.258531	-0.952189	-0.627017	0.494013	0.307148	Cluster -360	anatomical structure development;anatomical structure morphogenesis;biological process involved in interspecies interaction between organisms;biological regulation;cell differentiation;cellular aromatic compound metabolic process;cellular component organization;cellular component organization or biogenesis;cellular developmental process;cellular metabolic process;cellular nitrogen compound metabo…	acyltransferase activity;aminoacyltransferase activity;binding;catalytic activity;catalytic activity, acting on a protein;cation binding;chromatin binding;chromo shadow domain binding;DNA binding;enzyme binding;ion binding;kinase activity;Krueppel-associated box domain binding;metal ion binding;nucleic acid binding;organic cyclic compound binding;phosphotransferase activity, alcohol group as acce…	cellular anatomical entity;chromatin;euchromatin;heterochromatin;intracellular membrane-bounded organelle;intracellular organelle;membrane-bounded organelle;nuclear protein-containing complex;nucleoplasm;nucleus;organelle;protein-containing complex;protein-DNA complex;RNA polymerase II transcription regulator complex;transcription regulator complex		0.00731388	-2.1853
A3KFU5;A3KFU8;Q6PHQ9;Q91YZ8	A3KFU5	Pabpc4	Pabpc4	Polyadenylate-binding protein	-0.236643	1.11505	1.50866	0.697659	1.24044	-0.2752	0.900246	0.162504	-0.789618	-0.975249	-2.2502	-0.00464007	-1.27465	-0.243999	0.4048	0.020846	Cluster -360	anatomical structure development;biological regulation;cell development;cellular developmental process;cellular process;developmental process;hemopoiesis;myeloid cell development;post-transcriptional regulation of gene expression;regulation of biological process;regulation of biological quality;regulation of biosynthetic process;regulation of catabolic process;regulation of cellular biosynthetic …	binding;mRNA 3'-UTR binding;mRNA binding;nucleic acid binding;organic cyclic compound binding;poly(A) binding;poly(U) RNA binding;poly-purine tract binding;poly-pyrimidine tract binding;RNA binding;single-stranded RNA binding	cellular anatomical entity;cytoplasm;cytoplasmic ribonucleoprotein granule;cytoplasmic stress granule;cytosol;intracellular membrane-bounded organelle;intracellular non-membrane-bounded organelle;intracellular organelle;membrane-bounded organelle;non-membrane-bounded organelle;nucleus;organelle;protein-containing complex;ribonucleoprotein complex;ribonucleoprotein granule;supramolecular complex		0.00539438	-1.68835
O35737	O35737	Hnrnph1	Hnrnph1	Heterogeneous nuclear ribonucleoprotein H	0.0658492	0.65859	2.21105	0.780704	0.755569	-0.642978	0.120569	0.580842	-0.589521	-1.36573	-2.21659	-0.315192	0.0932693	-0.615229	0.250651	0.228142	Cluster -360	biological regulation;cellular aromatic compound metabolic process;cellular metabolic process;cellular nitrogen compound metabolic process;cellular process;cellular response to chemical stimulus;cellular response to cytokine stimulus;cellular response to interleukin-7;cellular response to organic substance;cellular response to stimulus;heterocycle metabolic process;macromolecule metabolic process…	binding;enzyme binding;identical protein binding;nucleic acid binding;organic cyclic compound binding;protein binding;RNA binding	catalytic complex;catalytic step 2 spliceosome;cellular anatomical entity;cytosol;intracellular membrane-bounded organelle;intracellular organelle;membrane-bounded organelle;nuclear protein-containing complex;nucleoplasm;nucleus;organelle;postsynaptic density;postsynaptic specialization;protein-containing complex;ribonucleoprotein complex;spliceosomal complex		0.0173316	-1.53803
Q9D0E1	Q9D0E1	Hnrnpm	Hnrnpm	Heterogeneous nuclear ribonucleoprotein M	0.0121296	0.504308	2.44871	0.614104	0.934271	-0.281524	0.147669	0.338648	-0.822255	-1.43838	-1.75451	-0.329452	-0.403666	-0.870009	0.565918	0.334037	Cluster -360	alternative mRNA splicing, via spliceosome;biological regulation;cellular aromatic compound metabolic process;cellular metabolic process;cellular nitrogen compound metabolic process;cellular process;heterocycle metabolic process;macromolecule metabolic process;metabolic process;mRNA metabolic process;mRNA processing;mRNA splicing, via spliceosome;nitrogen compound metabolic process;nucleic acid m…	antigen binding;binding;calcium-dependent protein binding;mRNA binding;nucleic acid binding;organic cyclic compound binding;protein antigen binding;protein binding;protein domain specific binding;RNA binding	catalytic complex;catalytic step 2 spliceosome;cell junction;cell surface;cellular anatomical entity;collagen-containing extracellular matrix;cytoplasm;external encapsulating structure;extracellular matrix;glutamatergic synapse;intracellular membrane-bounded organelle;intracellular organelle;membrane-bounded organelle;nuclear body;nuclear matrix;nuclear protein-containing complex;nucleoplasm;nucl…	Spliceosome	0.012259	-1.56813
Q7TMK9	Q7TMK9	Syncrip	Syncrip	Heterogeneous nuclear ribonucleoprotein Q	0.0652353	0.661677	1.87824	0.730409	0.39996	-0.801868	1.18956	0.456966	-0.870332	-1.00119	-1.03979	0.0440089	-2.19477	-0.210188	0.597167	0.0949201	Cluster -360	biological regulation;cellular aromatic compound metabolic process;cellular metabolic process;cellular nitrogen compound metabolic process;cellular process;cellular response to chemical stimulus;cellular response to cytokine stimulus;cellular response to organic substance;cellular response to stimulus;cellular response to type II interferon;CRD-mediated mRNA stabilization;heterocycle metabolic pr…	binding;mRNA 3'-UTR binding;mRNA 5'-UTR binding;mRNA binding;nucleic acid binding;organic cyclic compound binding;poly(A) binding;poly-purine tract binding;RNA binding;single-stranded RNA binding	catalytic complex;catalytic step 2 spliceosome;cell body;cell projection;cellular anatomical entity;CRD-mediated mRNA stability complex;cytoplasm;cytosol;dendrite;endoplasmic reticulum;GAIT complex;histone pre-mRNA 3'end processing complex;intracellular membrane-bounded organelle;intracellular organelle;intracellular protein-containing complex;mCRD-mediated mRNA stability complex;membrane-bounded…		0.0158483	-1.34808	SYNCRIP
P27612	P27612	Plaa	Plaa	Phospholipase A-2-activating protein	0.480856	0.511287	0.731362	0.422195	0.947228	0.465783	0.427149	0.139782	-2.63359	-0.0614962	-1.36378	0.0763521	-1.68534	0.388841	0.666146	0.487228	Cluster -360	anatomical structure development;autophagy;biological regulation;carboxylic acid metabolic process;catabolic process;cellular catabolic process;cellular homeostasis;cellular lipid metabolic process;cellular metabolic process;cellular process;cellular response to biotic stimulus;cellular response to chemical stimulus;cellular response to lipid;cellular response to lipopolysaccharide;cellular respo…	binding;enzyme activator activity;enzyme regulator activity;lipase activator activity;molecular function activator activity;molecular function regulator activity;phospholipase A2 activator activity;phospholipase activator activity;protein binding;ubiquitin binding;ubiquitin-like protein binding	cell junction;cellular anatomical entity;cytoplasm;extracellular exosome;extracellular membrane-bounded organelle;extracellular organelle;extracellular vesicle;intracellular membrane-bounded organelle;intracellular organelle;membrane-bounded organelle;nucleus;organelle;synapse;vesicle	Protein processing in endoplasmic reticulum	0.0336634	-1.04662
P62334	P62334	Psmc6	Psmc6	26S proteasome regulatory subunit 10B	0.280861	0.697779	0.99917	0.787732	0.307707	0.906017	0.368856	0.3488	-2.25609	-0.413647	-1.59659	0.244245	-1.81184	0.249906	0.573178	0.313916	Cluster -360	biological regulation;catabolic process;cellular process;cellular response to stimulus;cellular response to stress;ERAD pathway;macromolecule catabolic process;macromolecule metabolic process;metabolic process;modification-dependent macromolecule catabolic process;modification-dependent protein catabolic process;nitrogen compound metabolic process;organic substance catabolic process;organic subst…	adenyl nucleotide binding;adenyl ribonucleotide binding;anion binding;ATP binding;ATP hydrolysis activity;ATP-dependent activity;binding;carbohydrate derivative binding;catalytic activity;heterocyclic compound binding;hydrolase activity;hydrolase activity, acting on acid anhydrides;hydrolase activity, acting on acid anhydrides, in phosphorus-containing anhydrides;identical protein binding;ion bin…	catalytic complex;cellular anatomical entity;cytosolic proteasome complex;endopeptidase complex;inclusion body;intracellular anatomical structure;intracellular membrane-bounded organelle;intracellular organelle;intracellular protein-containing complex;membrane-bounded organelle;nucleus;organelle;peptidase complex;proteasome accessory complex;proteasome complex;proteasome regulatory particle, base…	Proteasome	0.0127686	-1.76394
P19157;P46425	P19157	Gstp1;Gstp2	Gstp1	Glutathione S-transferase P 1	0.70492	0.646927	0.603593	0.819045	0.68224	-0.0104548	0.292807	0.537165	-2.044	-0.818247	-1.81364	0.433677	-1.66832	0.169545	0.732369	0.732369	Cluster -360	anatomical structure development;animal organ development;animal organ regeneration;biological regulation;biosynthetic process;carboxylic acid biosynthetic process;carboxylic acid metabolic process;cell communication;cell development;cell population proliferation;cellular biosynthetic process;cellular developmental process;cellular lipid metabolic process;cellular metabolic process;cellular proce…	anion binding;antioxidant activity;binding;carboxylic acid binding;catalytic activity;dinitrosyl-iron complex binding;enzyme binding;enzyme regulator activity;fatty acid binding;glutathione peroxidase activity;glutathione transferase activity;ion binding;JUN kinase binding;kinase binding;kinase regulator activity;lipid binding;molecular function regulator activity;monocarboxylic acid binding;orga…	cellular anatomical entity;cytoplasm;cytosol;intracellular membrane-bounded organelle;intracellular organelle;membrane;membrane-bounded organelle;mitochondrion;nucleus;organelle;plasma membrane;protein-containing complex;TRAF2-GSTP1 complex	Drug metabolism - cytochrome P450;Glutathione metabolism;Metabolism of xenobiotics by cytochrome P450	0.0266049	-1.98566
Q9EQH3	Q9EQH3	Vps35	Vps35	Vacuolar protein sorting-associated protein 35	0.425328	0.735776	0.525383	0.721493	0.432499	0.299089	0.617722	0.549199	-2.17357	-0.960911	-2.11885	0.603366	-1.11902	0.309766	0.514825	0.637901	Cluster -360	apoptotic mitochondrial changes;biological regulation;cellular component organization;cellular component organization or biogenesis;cellular localization;cellular macromolecule localization;cellular process;cytosolic transport;endocytic recycling;endosomal transport;endosome to plasma membrane protein transport;establishment of localization;establishment of localization in cell;establishment of p…	binding;D1 dopamine receptor binding;dopamine receptor binding;G protein-coupled receptor binding;protein binding;signaling receptor binding	bounding membrane of organelle;cell body;cell junction;cell projection;cellular anatomical entity;cytoplasm;cytoplasmic vesicle;cytoplasmic vesicle membrane;cytosol;dopaminergic synapse;early endosome;endosome;endosome membrane;glutamatergic synapse;intracellular membrane-bounded organelle;intracellular organelle;intracellular vesicle;late endosome;lysosome;lytic vacuole;membrane;membrane protein…		0.0253357	-1.35826
Q7TQI3	Q7TQI3	Otub1	Otub1	Ubiquitin thioesterase OTUB1	0.362718	0.589327	1.10887	0.722549	0.286966	-0.106826	0.51097	0.784852	-2.20877	-0.554385	-1.93977	0.329846	-1.31674	0.557514	0.833626	0.0392456	Cluster -360	adaptive immune response;biological regulation;cellular aromatic compound metabolic process;cellular metabolic process;cellular nitrogen compound metabolic process;cellular process;cellular response to stimulus;cellular response to stress;DNA damage response;DNA metabolic process;DNA repair;heterocycle metabolic process;immune response;immune system process;macromolecule metabolic process;macromo…	binding;catalytic activity;catalytic activity, acting on a protein;cysteine-type deubiquitinase activity;cysteine-type peptidase activity;deNEDDylase activity;deubiquitinase activity;enzyme binding;enzyme inhibitor activity;enzyme regulator activity;hydrolase activity;molecular function inhibitor activity;molecular function regulator activity;peptidase activity;protein binding;ubiquitin binding;u…	cellular anatomical entity;cytoplasm		0.0273311	-1.73109
Q8JZV9	Q8JZV9	Bdh2	Bdh2	Dehydrogenase/reductase SDR family member 6	0.495911	0.26458	1.10536	0.563428	0.252627	0.524764	0.0959447	0.908145	-2.61759	-1.07287	-1.23734	-0.24282	-0.979937	0.38269	0.951508	0.6056	Cluster -360	amide biosynthetic process;amide metabolic process;biosynthetic process;carboxylic acid catabolic process;carboxylic acid metabolic process;catabolic process;cell differentiation;cellular aromatic compound metabolic process;cellular biosynthetic process;cellular catabolic process;cellular developmental process;cellular lipid catabolic process;cellular lipid metabolic process;cellular metabolic pr…	3-hydroxybutyrate dehydrogenase activity;4-oxoproline reductase activity;adenyl nucleotide binding;binding;catalytic activity;heterocyclic compound binding;NAD binding;nucleoside phosphate binding;nucleotide binding;organic cyclic compound binding;oxidoreductase activity;oxidoreductase activity, acting on CH-OH group of donors;oxidoreductase activity, acting on the CH-CH group of donors;oxidoredu…	cellular anatomical entity;cytoplasm;cytosol	Butanoate metabolism;Synthesis and degradation of ketone bodies	0.0295189	-1.22646
Q9QYJ0	Q9QYJ0	Dnaja2	Dnaja2	DnaJ homolog subfamily A member 2	0.180901	1.04837	-0.0727156	0.440156	0.941967	0.879739	0.879739	0.572724	-2.02995	-1.63414	-1.46845	0.310092	-1.18824	0.307373	0.347434	0.485009	Cluster -360	cellular process;protein folding;protein refolding;response to abiotic stimulus;response to heat;response to stimulus;response to stress;response to temperature stimulus	adenyl nucleotide binding;adenyl ribonucleotide binding;anion binding;ATP binding;ATPase activator activity;ATPase regulator activity;binding;carbohydrate derivative binding;cation binding;heat shock protein binding;heterocyclic compound binding;Hsp70 protein binding;ion binding;metal ion binding;molecular function activator activity;molecular function regulator activity;nucleoside phosphate bind…	cellular anatomical entity;cytoplasm;cytosol;membrane	Protein processing in endoplasmic reticulum	0.00907142	-1.4481
Q9CQC6	Q9CQC6	Bzw1	Bzw1	eIF5-mimic protein 2	0.169451	0.518329	1.09664	0.478568	0.517289	0.664131	0.0910699	0.86217	-1.65565	-2.07241	-1.92632	0.612783	-0.432717	0.14283	0.616525	0.317301	Cluster -360	biological regulation;post-transcriptional regulation of gene expression;regulation of amide metabolic process;regulation of biological process;regulation of biosynthetic process;regulation of cellular biosynthetic process;regulation of cellular metabolic process;regulation of cellular process;regulation of gene expression;regulation of macromolecule biosynthetic process;regulation of macromolecu…		cellular anatomical entity;cytoplasm		0.0217898	-1.35134
P28656	P28656	Nap1l1	Nap1l1	Nucleosome assembly protein 1-like 1	0.521359	0.693288	0.866367	0.792894	0.770475	0.584978	0.24742	0.54489	-2.46472	-1.76154	-1.32787	0.364895	-0.523018	0.0611547	0.2037	0.425736	Cluster -360	anatomical structure development;biological regulation;cellular component assembly;cellular component organization;cellular component organization or biogenesis;cellular process;chromatin organization;chromatin remodeling;developmental process;nervous system development;nucleosome assembly;nucleosome organization;positive regulation of biological process;positive regulation of cell development;po…	binding;chromatin binding;enzyme binding;histone binding;histone chaperone activity;kinase binding;molecular carrier activity;protein binding;protein carrier chaperone;protein-containing complex binding	cellular anatomical entity;chromatin;cytoplasm;cytoplasmic vesicle;intracellular membrane-bounded organelle;intracellular organelle;intracellular vesicle;melanosome;membrane-bounded organelle;nucleus;organelle;pigment granule;protein-containing complex;protein-DNA complex;vesicle		0.00660335	-1.4454
P62192	P62192	Psmc1	Psmc1	26S proteasome regulatory subunit 4	0.420908	0.636079	0.602751	0.546443	0.380956	0.998975	0.650747	0.49423	-2.48901	-1.46063	-1.67889	0.487418	-0.462922	0.0457906	0.380537	0.446615	Cluster -360	catabolic process;macromolecule catabolic process;macromolecule metabolic process;metabolic process;modification-dependent macromolecule catabolic process;modification-dependent protein catabolic process;nitrogen compound metabolic process;organic substance catabolic process;organic substance metabolic process;organonitrogen compound catabolic process;organonitrogen compound metabolic process;pri…	adenyl nucleotide binding;adenyl ribonucleotide binding;anion binding;ATP binding;ATP hydrolysis activity;ATP-dependent activity;binding;carbohydrate derivative binding;catalytic activity;general transcription initiation factor binding;heterocyclic compound binding;hydrolase activity;hydrolase activity, acting on acid anhydrides;hydrolase activity, acting on acid anhydrides, in phosphorus-contain…	catalytic complex;cellular anatomical entity;cytosol;endopeptidase complex;intracellular protein-containing complex;membrane;nucleoplasm;peptidase complex;proteasome accessory complex;proteasome complex;proteasome regulatory particle;proteasome regulatory particle, base subcomplex;protein-containing complex	Proteasome	0.0119626	-1.78261
Q61699	Q61699	Hsph1	Hsph1	Heat shock protein 105 kDa	0.156144	0.737709	0.702466	0.459524	0.817182	0.273835	0.456282	0.551545	-2.79211	-1.3904	-0.968423	0.378315	-0.911652	0.326243	0.597355	0.605978	Cluster -360	biological regulation;cellular process;chaperone cofactor-dependent protein refolding;chaperone-mediated protein folding;'de novo' post-translational protein folding;'de novo' protein folding;negative regulation of apoptotic process;negative regulation of biological process;negative regulation of cellular process;negative regulation of neuron apoptotic process;negative regulation of programmed ce…	adenyl nucleotide binding;adenyl ribonucleotide binding;adenyl-nucleotide exchange factor activity;alpha-tubulin binding;anion binding;ATP binding;ATPase regulator activity;ATP-dependent activity;ATP-dependent protein folding chaperone;binding;carbohydrate derivative binding;cytoskeletal protein binding;heterocyclic compound binding;ion binding;molecular function regulator activity;nucleoside pho…	cellular anatomical entity;cytoplasm;cytosol;extracellular region;intracellular membrane-bounded organelle;intracellular organelle;membrane-bounded organelle;nucleoplasm;nucleus;organelle;protein-containing complex	Protein processing in endoplasmic reticulum	0.0322026	-1.29115
Q91WQ3	Q91WQ3	Yars1	Yars1	Tyrosine--tRNA ligase, cytoplasmic	-0.0962534	0.954271	0.375879	0.609945	1.05731	0.423703	0.285662	0.720345	-2.34601	-1.30364	-1.54799	0.358927	-1.02117	0.247241	0.553944	0.727834	Cluster -360	amino acid activation;amino acid metabolic process;carboxylic acid metabolic process;cellular aromatic compound metabolic process;cellular metabolic process;cellular nitrogen compound metabolic process;cellular process;heterocycle metabolic process;macromolecule metabolic process;metabolic process;ncRNA metabolic process;nitrogen compound metabolic process;nucleic acid metabolic process;nucleobas…	adenyl nucleotide binding;adenyl ribonucleotide binding;aminoacyl-tRNA ligase activity;anion binding;ATP binding;binding;carbohydrate derivative binding;catalytic activity;catalytic activity, acting on a nucleic acid;catalytic activity, acting on a tRNA;catalytic activity, acting on RNA;heterocyclic compound binding;ion binding;ligase activity;ligase activity, forming carbon-oxygen bonds;nucleic …	cellular anatomical entity;cytoplasm;cytosol;intracellular membrane-bounded organelle;intracellular organelle;membrane-bounded organelle;nuclear body;nucleus;organelle	Aminoacyl-tRNA biosynthesis	0.0243471	-1.16257
Q8VEK0	Q8VEK0	Tmem30a	Tmem30a	Cell cycle control protein 50A	0.263748	0.424816	0.368648	0.753407	0.676329	1.46579	-0.31143	0.651103	-1.49642	-1.13801	-2.13248	0.405526	-1.33191	0.377723	0.170109	0.853049	Cluster -360	aminophospholipid transport;biological regulation;cellular component organization;cellular component organization or biogenesis;cellular localization;cellular macromolecule localization;cellular process;establishment of localization;lipid translocation;lipid transport;localization;macromolecule localization;membrane organization;nitrogen compound transport;organic substance transport;organophosph…	aminophospholipid flippase activity;ATPase-coupled intramembrane lipid transporter activity;ATP-dependent activity;flippase activity;intramembrane lipid transporter activity;lipid transporter activity;phospholipid transporter activity;structural molecule activity;transporter activity	apical plasma membrane;bounding membrane of organelle;cellular anatomical entity;cytoplasmic vesicle membrane;early endosome membrane;endoplasmic reticulum;endosome membrane;Golgi apparatus;intracellular membrane-bounded organelle;intracellular organelle;late endosome membrane;membrane;membrane-bounded organelle;organelle;organelle membrane;phospholipid-translocating ATPase complex;plasma membran…		0.0259205	-1.11662
Q61655	Q61655	Ddx19a	Ddx19a	ATP-dependent RNA helicase DDX19A	0.267151	0.658628	0.662077	0.429256	0.417942	0.935162	0.190322	0.494936	-1.47037	-1.08652	-2.50369	0.14051	-1.14275	0.30175	0.68001	1.02558	Cluster -360	biological regulation;cellular localization;cellular process;establishment of localization;establishment of localization in cell;establishment of RNA localization;intracellular transport;localization;mRNA export from nucleus;mRNA transport;nitrogen compound transport;nuclear export;nuclear transport;nucleic acid transport;nucleobase-containing compound transport;nucleocytoplasmic transport;organi…	adenyl nucleotide binding;adenyl ribonucleotide binding;anion binding;ATP binding;ATP hydrolysis activity;ATP-dependent activity;ATP-dependent activity, acting on RNA;binding;carbohydrate derivative binding;catalytic activity;catalytic activity, acting on a nucleic acid;catalytic activity, acting on RNA;helicase activity;heterocyclic compound binding;hydrolase activity;hydrolase activity, acting …	cellular anatomical entity;cytoplasmic ribonucleoprotein granule;cytoplasmic stress granule;intracellular membrane-bounded organelle;intracellular non-membrane-bounded organelle;intracellular organelle;membrane-bounded organelle;non-membrane-bounded organelle;nucleoplasm;nucleus;organelle;ribonucleoprotein granule;supramolecular complex		0.0373997	-1.62541
Q8R050	Q8R050	Gspt1	Gspt1	Eukaryotic peptide chain release factor GTP-binding subunit ERF3A	0.465409	0.800238	0.500079	0.824048	0.818765	0.983694	0.307692	0.618991	-1.99136	-0.958286	-2.14082	0.104606	-1.02742	0.523589	-0.28599	0.45676	Cluster -360	amide biosynthetic process;amide metabolic process;aromatic compound catabolic process;biological regulation;biosynthetic process;catabolic process;cellular aromatic compound metabolic process;cellular biosynthetic process;cellular catabolic process;cellular component disassembly;cellular component organization;cellular component organization or biogenesis;cellular metabolic process;cellular nitr…	anion binding;binding;carbohydrate derivative binding;catalytic activity;GTP binding;GTPase activity;guanyl nucleotide binding;guanyl ribonucleotide binding;heterocyclic compound binding;hydrolase activity;hydrolase activity, acting on acid anhydrides;hydrolase activity, acting on acid anhydrides, in phosphorus-containing anhydrides;ion binding;nucleic acid binding;nucleoside phosphate binding;nu…	cellular anatomical entity;cytoplasm;cytosolic ribosome;intracellular non-membrane-bounded organelle;intracellular organelle;non-membrane-bounded organelle;organelle;protein-containing complex;ribosome;translation release factor complex	mRNA surveillance pathway	0.00330276	-1.54913
Q9Z1R2	Q9Z1R2	Bag6	Bag6	Large proline-rich protein BAG6	0.0332713	0.95317	0.564209	0.715793	0.711906	0.787567	0.326457	0.610244	-2.04161	-0.864467	-2.17039	0.363779	-1.16249	0.152195	0.50127	0.519084	Cluster -360	activation of immune response;anatomical structure development;animal organ development;antigen processing and presentation;antigen processing and presentation of peptide antigen;antigen processing and presentation of peptide antigen via MHC class I;apoptotic process;apoptotic signaling pathway;biological regulation;brain development;catabolic process;cell activation;cell cycle process;cell death…	binding;enzyme binding;heat shock protein binding;Hsp70 protein binding;identical protein binding;misfolded protein binding;modification-dependent protein binding;polyubiquitin modification-dependent protein binding;protease binding;proteasome binding;protein binding;protein-containing complex binding;protein-folding chaperone binding;ribonucleoprotein complex binding;ribosome binding;signaling r…	BAT3 complex;cellular anatomical entity;cytoplasm;cytosol;ER membrane insertion complex;extracellular exosome;extracellular membrane-bounded organelle;extracellular organelle;extracellular vesicle;intracellular membrane-bounded organelle;intracellular organelle;membrane;membrane-bounded organelle;nucleoplasm;nucleus;organelle;protein-containing complex;vesicle		0.0126314	-1.36575
Q9WU78	Q9WU78	Pdcd6ip	Pdcd6ip	Programmed cell death 6-interacting protein	0.404993	0.548398	-0.448297	0.783721	0.618832	0.324304	0.964118	0.77627	-1.79153	-1.10105	-2.29206	0.620541	-0.871899	0.367585	0.280371	0.815703	Cluster -360	actin cytoskeleton organization;actin filament-based process;actomyosin contractile ring assembly;actomyosin contractile ring organization;actomyosin structure organization;apoptotic process;assembly of actomyosin apparatus involved in cytokinesis;autophagy;bicellular tight junction assembly;biological regulation;catabolic process;cell cycle process;cell death;cell junction assembly;cell junction…	binding;calcium-dependent protein binding;G protein-coupled receptor binding;identical protein binding;protein binding;protein dimerization activity;protein domain specific binding;protein homodimerization activity;proteinase activated receptor binding;SH3 domain binding;signaling receptor binding	actomyosin;anchoring junction;bicellular tight junction;cell junction;cell-cell junction;cellular anatomical entity;cytoplasmic vesicle;cytosol;endoplasmic reticulum exit site;endosome;extracellular exosome;extracellular membrane-bounded organelle;extracellular organelle;extracellular vesicle;Flemming body;immunological synapse;intracellular membrane-bounded organelle;intracellular organelle;intr…	Endocytosis	0.042222	-1.56399		PDCD6IP
Q3U1J4	Q3U1J4	Ddb1	Ddb1	DNA damage-binding protein 1	0.177421	0.560392	0.426754	-0.0643048	-0.29172	1.62636	1.85787	0.498925	-1.70473	-0.68977	-0.407235	-0.780077	-1.73505	-0.0738735	0.885168	-0.286132	Cluster -360	apoptotic process;biological process involved in interaction with host;biological process involved in interaction with symbiont;biological process involved in interspecies interaction between organisms;biological process involved in symbiotic interaction;biological regulation;catabolic process;cell cycle process;cell death;cell surface receptor signaling pathway;cellular aromatic compound metabol…	binding;cullin family protein binding;damaged DNA binding;DNA binding;molecular adaptor activity;nucleic acid binding;organic cyclic compound binding;protein binding;protein domain specific binding;protein-containing complex binding;protein-macromolecule adaptor activity;ubiquitin ligase complex scaffold activity;WD40-repeat domain binding	catalytic complex;cellular anatomical entity;Cul4A-RING E3 ubiquitin ligase complex;Cul4B-RING E3 ubiquitin ligase complex;Cul4-RING E3 ubiquitin ligase complex;cullin-RING ubiquitin ligase complex;cytoplasm;intracellular membrane-bounded organelle;intracellular non-membrane-bounded organelle;intracellular organelle;intracellular protein-containing complex;membrane-bounded organelle;non-membrane-…	Nucleotide excision repair;Ubiquitin mediated proteolysis	0.0106316	-1.15787
Q9WTM5	Q9WTM5	Ruvbl2	Ruvbl2	RuvB-like 2	0.295213	0.922335	0.087098	0.498163	0.354063	1.31034	1.00844	0.454968	-2.35018	-0.723813	-1.12794	0.145471	-1.69722	0.274935	0.656857	-0.108735	Cluster -360	biological regulation;box C/D snoRNP assembly;cellular aromatic compound metabolic process;cellular component assembly;cellular component organization;cellular component organization or biogenesis;cellular localization;cellular macromolecule localization;cellular metabolic process;cellular nitrogen compound metabolic process;cellular process;cellular response to abiotic stimulus;cellular response…	adenyl nucleotide binding;adenyl ribonucleotide binding;ADP binding;anion binding;ATP binding;ATP hydrolysis activity;ATPase binding;ATP-dependent activity;ATP-dependent activity, acting on DNA;basal RNA polymerase II transcription machinery binding;basal transcription machinery binding;beta-catenin binding;binding;carbohydrate derivative binding;catalytic activity;catalytic activity, acting on a…	acetyltransferase complex;ATPase complex;catalytic complex;cellular anatomical entity;centrosome;chromatin;cytoplasm;cytosol;dynein axonemal particle;euchromatin;H4 histone acetyltransferase complex;H4/H2A histone acetyltransferase complex;histone acetyltransferase complex;histone deacetylase complex;histone methyltransferase complex;Ino80 complex;INO80-type complex;intracellular membrane-bounded…		0.00801883	-1.48644
P62751	P62751	Rpl23a	Rpl23a	Large ribosomal subunit protein uL23	0.222557	0.996776	-0.334044	1.02189	0.621397	0.953361	1.73261	0.260162	-1.85104	-1.15342	-1.1373	-0.216579	-1.38001	-0.252015	0.603085	-0.0874243	Cluster -360	amide biosynthetic process;amide metabolic process;biosynthetic process;cellular biosynthetic process;cellular component assembly;cellular component organization;cellular component organization or biogenesis;cellular metabolic process;cellular nitrogen compound biosynthetic process;cellular nitrogen compound metabolic process;cellular process;cytoplasmic translation;macromolecule biosynthetic pro…	binding;large ribosomal subunit rRNA binding;nucleic acid binding;organic cyclic compound binding;protein-containing complex binding;RNA binding;rRNA binding;structural constituent of ribosome;structural molecule activity;TORC2 complex binding	cell junction;cellular anatomical entity;cytoplasm;cytosol;cytosolic large ribosomal subunit;cytosolic ribosome;intracellular membrane-bounded organelle;intracellular non-membrane-bounded organelle;intracellular organelle;large ribosomal subunit;membrane-bounded organelle;non-membrane-bounded organelle;nucleus;organelle;postsynapse;presynapse;protein-containing complex;ribonucleoprotein complex;r…	Ribosome	0.00220413	-2.11578
Q9JHD2	Q9JHD2	Kat2a	Kat2a	Histone acetyltransferase KAT2A	0.465755	0.39235	0.879398	1.08304	0.502253	-0.307139	1.06731	0.659513	-2.43939	-1.50546	-0.288901	-0.672126	-0.886592	0.128694	1.0863	-0.165008	Cluster -360	anatomical structure development;anatomical structure formation involved in morphogenesis;animal organ development;anterior/posterior pattern specification;appendage development;behavior;biological regulation;biosynthetic process;carbohydrate biosynthetic process;carbohydrate metabolic process;cell population proliferation;cellular component organization;cellular component organization or biogene…	acetyltransferase activity;acyltransferase activity;acyltransferase activity, transferring groups other than amino-acyl groups;binding;catalytic activity;catalytic activity, acting on a protein;chromatin binding;DNA-binding transcription factor binding;enzyme binding;histone acetyltransferase activity;histone deacetylase binding;histone glutaryltransferase activity;histone H3 acetyltransferase ac…	acetyltransferase complex;ATAC complex;catalytic complex;cellular anatomical entity;centrosome;chromatin;dihydrolipoyl dehydrogenase complex;histone acetyltransferase complex;intracellular membrane-bounded organelle;intracellular non-membrane-bounded organelle;intracellular organelle;intracellular protein-containing complex;membrane-bounded organelle;microtubule organizing center;mitotic spindle;…	Notch signaling pathway	0.011703	-1.37624
P62869	P62869	Elob	Elob	Elongin-B	0.451738	0.651296	0.651296	0.661383	0.434775	-0.0764026	0.495523	0.757327	-2.52507	-2.04903	-0.0209038	0.268159	-1.05039	0.593672	0.609961	0.146667	Cluster -360	aromatic compound biosynthetic process;aromatic compound catabolic process;biological regulation;biosynthetic process;catabolic process;cellular aromatic compound metabolic process;cellular biosynthetic process;cellular catabolic process;cellular metabolic process;cellular nitrogen compound biosynthetic process;cellular nitrogen compound catabolic process;cellular nitrogen compound metabolic proc…	binding;enzyme binding;protein binding;protein-containing complex binding;transcription coactivator activity;transcription coregulator activity;transcription coregulator binding;transcription corepressor binding;transcription factor binding;transcription regulator activity;ubiquitin protein ligase binding;ubiquitin-like protein ligase binding	catalytic complex;cellular anatomical entity;Cul2-RING ubiquitin ligase complex;Cul5-RING ubiquitin ligase complex;cullin-RING ubiquitin ligase complex;cytoplasmic ubiquitin ligase complex;cytosol;elongin complex;intracellular protein-containing complex;nuclear protein-containing complex;protein-containing complex;transcription elongation factor complex;transcription regulator complex;transferase…	Pathways in cancer;Renal cell carcinoma;Ubiquitin mediated proteolysis	0.0390057	-1.36472
Q8BGQ7	Q8BGQ7	Aars1	Aars1	Alanine--tRNA ligase, cytoplasmic	0.353889	0.948025	0.0808687	0.761527	0.957004	-0.192271	0.48503	0.49499	-2.31173	-1.2867	0.174493	-0.0949098	-1.99672	0.429765	0.720117	0.476616	Cluster -360	alanyl-tRNA aminoacylation;amino acid activation;amino acid metabolic process;anatomical structure development;apoptotic process;biological regulation;carboxylic acid metabolic process;cell death;cellular aromatic compound metabolic process;cellular metabolic process;cellular nitrogen compound metabolic process;cellular process;cerebellar Purkinje cell layer development;developmental process;hete…	adenyl nucleotide binding;adenyl ribonucleotide binding;alanine-tRNA ligase activity;amino acid binding;aminoacyl-tRNA editing activity;aminoacyl-tRNA ligase activity;anion binding;ATP binding;binding;carbohydrate derivative binding;carboxylic acid binding;carboxylic ester hydrolase activity;catalytic activity;catalytic activity, acting on a nucleic acid;catalytic activity, acting on a tRNA;catal…	cellular anatomical entity;cytosol;intracellular membrane-bounded organelle;intracellular organelle;membrane-bounded organelle;mitochondrion;organelle	Aminoacyl-tRNA biosynthesis	0.0475058	-1.29643
Q8BHN3	Q8BHN3	Ganab	Ganab	Neutral alpha-glucosidase AB	0.326971	0.656568	1.23737	0.440723	0.706248	0.366446	0.396868	0.251425	-2.5435	-1.24137	-0.625673	0.326971	-1.57033	0.0452652	0.891021	0.335	Cluster -360	carbohydrate derivative metabolic process;carbohydrate metabolic process;glycoprotein metabolic process;macromolecule metabolic process;metabolic process;N-glycan processing;nitrogen compound metabolic process;organic substance metabolic process;organonitrogen compound metabolic process;primary metabolic process;protein metabolic process	alpha-1,3-glucosidase activity;alpha-glucosidase activity;binding;carbohydrate binding;catalytic activity;glucan 1,3-alpha-glucosidase activity;glucosidase activity;hydrolase activity;hydrolase activity, acting on glycosyl bonds;hydrolase activity, hydrolyzing O-glycosyl compounds	catalytic complex;cellular anatomical entity;cytoplasmic vesicle;endoplasmic reticulum;endoplasmic reticulum protein-containing complex;glucosidase II complex;Golgi apparatus;intracellular membrane-bounded organelle;intracellular organelle;intracellular vesicle;melanosome;membrane-bounded organelle;organelle;pigment granule;protein-containing complex;vesicle	N-Glycan biosynthesis;Protein processing in endoplasmic reticulum	0.0223465	-1.68984
A2BDX3	A2BDX3	Mocs3	Mocs3	Adenylyltransferase and sulfurtransferase MOCS3	0.578754	0.376042	1.02052	0.670006	0.643038	0.671472	0.497869	0.728877	-2.47324	-1.6261	-0.34936	0.387496	-1.51426	0.121691	0.214068	0.0531278	Cluster -360	biosynthetic process;cellular aromatic compound metabolic process;cellular biosynthetic process;cellular metabolic process;cellular nitrogen compound metabolic process;cellular process;heterocycle biosynthetic process;heterocycle metabolic process;macromolecule metabolic process;macromolecule modification;metabolic process;molybdopterin cofactor biosynthetic process;molybdopterin cofactor metabol…	adenyl nucleotide binding;adenyl ribonucleotide binding;adenylyltransferase activity;anion binding;ATP binding;ATP-dependent activity;binding;carbohydrate derivative binding;catalytic activity;catalytic activity, acting on a protein;cation binding;heterocyclic compound binding;ion binding;ligase activity;ligase activity, forming carbon-sulfur bonds;metal ion binding;molybdopterin-synthase adenyly…	cellular anatomical entity;cytoplasm;cytosol	Sulfur relay system	0.00454958	-2.89069
P46471	P46471	Psmc2	Psmc2	26S proteasome regulatory subunit 7	0.262676	0.758951	0.748889	0.758951	0.460398	1.04627	0.574235	0.515094	-2.15162	-2.15628	-0.666435	0.200327	-1.12787	0.2698	0.453187	0.053433	Cluster -360	catabolic process;macromolecule catabolic process;macromolecule metabolic process;metabolic process;modification-dependent macromolecule catabolic process;modification-dependent protein catabolic process;nitrogen compound metabolic process;organic substance catabolic process;organic substance metabolic process;organonitrogen compound catabolic process;organonitrogen compound metabolic process;pri…	adenyl nucleotide binding;adenyl ribonucleotide binding;anion binding;ATP binding;ATP hydrolysis activity;ATP-dependent activity;binding;carbohydrate derivative binding;catalytic activity;general transcription initiation factor binding;heterocyclic compound binding;hydrolase activity;hydrolase activity, acting on acid anhydrides;hydrolase activity, acting on acid anhydrides, in phosphorus-contain…	catalytic complex;cell projection;cellular anatomical entity;cytoplasmic ribonucleoprotein granule;cytosol;dendritic spine;endopeptidase complex;intracellular non-membrane-bounded organelle;intracellular organelle;intracellular protein-containing complex;neuron projection;neuron spine;non-membrane-bounded organelle;organelle;P-body;peptidase complex;plasma membrane bounded cell projection;postsyn…	Proteasome	0.0052402	-1.75835
P60229	P60229	Eif3e	Eif3e	Eukaryotic translation initiation factor 3 subunit E	0.0835733	0.608671	0.702145	0.799537	0.436356	1.45536	1.14956	-0.121101	-2.3187	-1.08931	-0.562689	-0.0851859	-1.5072	-0.487377	0.543005	0.393348	Cluster -360	aromatic compound catabolic process;biological regulation;calcium ion homeostasis;catabolic process;cellular aromatic compound metabolic process;cellular catabolic process;cellular component assembly;cellular component organization;cellular component organization or biogenesis;cellular homeostasis;cellular metabolic process;cellular nitrogen compound catabolic process;cellular nitrogen compound m…	binding;nucleic acid binding;organic cyclic compound binding;protein binding;translation factor activity, RNA binding;translation initiation factor activity;translation regulator activity;translation regulator activity, nucleic acid binding;transmembrane transporter binding	cellular anatomical entity;cytoplasm;cytosol;eukaryotic 43S preinitiation complex;eukaryotic 48S preinitiation complex;eukaryotic translation initiation factor 3 complex;eukaryotic translation initiation factor 3 complex, eIF3e;intracellular membrane-bounded organelle;intracellular organelle;membrane-bounded organelle;nuclear body;nucleus;organelle;PML body;postsynaptic density;postsynaptic speci…	Hepatitis C;RNA transport	0.00537732	-1.96099
P14869	P14869	Rplp0	Rplp0	Large ribosomal subunit protein uL10	0.103445	0.524948	1.03988	0.732135	0.385469	0.732135	1.43259	0.0605481	-1.94991	-1.37834	-0.297858	0.246489	-1.95508	-0.372201	0.736103	-0.0403592	Cluster -360	amide biosynthetic process;amide metabolic process;biological regulation;biosynthetic process;body fluid secretion;cellular biosynthetic process;cellular component assembly;cellular component organization;cellular component organization or biogenesis;cellular metabolic process;cellular nitrogen compound biosynthetic process;cellular nitrogen compound metabolic process;cellular process;cellular re…	amide binding;binding;large ribosomal subunit rRNA binding;nucleic acid binding;organic cyclic compound binding;peptide binding;RNA binding;rRNA binding;structural constituent of ribosome;structural molecule activity	cell junction;cell projection;cellular anatomical entity;cytoplasm;cytoplasmic ribonucleoprotein granule;cytosol;cytosolic large ribosomal subunit;cytosolic ribosome;dendrite;endoplasmic reticulum;intracellular membrane-bounded organelle;intracellular non-membrane-bounded organelle;intracellular organelle;large ribosomal subunit;membrane-bounded organelle;neuron projection;non-membrane-bounded or…	Ribosome	0.00675592	-2.21668
P50580	P50580	Pa2g4	Pa2g4	Proliferation-associated protein 2G4	0.338285	0.321136	1.20918	0.639399	0.415253	-0.0516151	1.57435	0.170913	-2.61562	-1.30048	-0.209861	0.317022	-1.07403	-0.161965	0.588161	-0.160122	Cluster -360	biological regulation;cellular aromatic compound metabolic process;cellular metabolic process;cellular nitrogen compound metabolic process;cellular process;heterocycle metabolic process;macromolecule metabolic process;metabolic process;ncRNA metabolic process;ncRNA processing;negative regulation of apoptotic process;negative regulation of biological process;negative regulation of biosynthetic pro…	binding;enzyme binding;nucleic acid binding;organic cyclic compound binding;protein binding;RNA binding;transcription coregulator activity;transcription corepressor activity;transcription regulator activity;ubiquitin protein ligase binding;ubiquitin-like protein ligase binding	cellular anatomical entity;cytoplasm;intracellular membrane-bounded organelle;intracellular non-membrane-bounded organelle;intracellular organelle;membrane-bounded organelle;non-membrane-bounded organelle;nucleolus;nucleus;organelle;protein-containing complex;ribonucleoprotein complex		0.0148234	-1.55135
Q8CIG8	Q8CIG8	Prmt5	Prmt5	Protein arginine N-methyltransferase 5	0.225859	0.787653	0.490519	0.461874	0.401519	-0.00633258	1.4417	0.232477	-2.92682	-0.340349	-1.22049	0.23781	-0.696232	0.103182	0.919109	-0.111473	Cluster -360	aromatic compound biosynthetic process;biological regulation;biosynthetic process;cell activation;cellular aromatic compound metabolic process;cellular biosynthetic process;cellular component assembly;cellular component organization;cellular component organization or biogenesis;cellular metabolic process;cellular nitrogen compound biosynthetic process;cellular nitrogen compound metabolic process;…	arginine N-methyltransferase activity;binding;catalytic activity;catalytic activity, acting on a protein;chromatin binding;cis-regulatory region sequence-specific DNA binding;DNA binding;double-stranded DNA binding;E-box binding;heterocyclic compound binding;histone arginine N-methyltransferase activity;histone H2A methyltransferase activity;histone H2AR3 methyltransferase activity;histone H4 met…	catalytic complex;cellular anatomical entity;chromatin;cytoplasm;cytosol;germ cell nucleus;Golgi apparatus;histone methyltransferase complex;intracellular membrane-bounded organelle;intracellular organelle;male germ cell nucleus;membrane-bounded organelle;methylosome;methyltransferase complex;nuclear protein-containing complex;nucleoplasm;nucleus;organelle;protein-containing complex;protein-DNA c…	Cell cycle - yeast;RNA transport	0.0385316	-1.34821
P54775	P54775	Psmc4	Psmc4	26S proteasome regulatory subunit 6B	0.331899	0.797451	0.385256	0.786039	0.682091	1.131	0.633392	0.327685	-2.82513	-0.497116	-0.939695	0.235142	-1.20889	0.105068	0.572802	-0.516998	Cluster -360	anatomical structure development;blastocyst development;catabolic process;developmental process;macromolecule catabolic process;macromolecule metabolic process;metabolic process;modification-dependent macromolecule catabolic process;modification-dependent protein catabolic process;nitrogen compound metabolic process;organic substance catabolic process;organic substance metabolic process;organonit…	adenyl nucleotide binding;adenyl ribonucleotide binding;anion binding;ATP binding;ATP hydrolysis activity;ATP-dependent activity;binding;carbohydrate derivative binding;catalytic activity;heterocyclic compound binding;hydrolase activity;hydrolase activity, acting on acid anhydrides;hydrolase activity, acting on acid anhydrides, in phosphorus-containing anhydrides;ion binding;nucleoside phosphate …	catalytic complex;cell junction;cellular anatomical entity;cytosol;cytosolic proteasome complex;endopeptidase complex;inclusion body;intracellular anatomical structure;intracellular protein-containing complex;nucleoplasm;peptidase complex;proteasome accessory complex;proteasome complex;proteasome regulatory particle, base subcomplex;protein-containing complex;synapse	Proteasome	0.00587402	-1.60128
Q505F5	Q505F5	Lrrc47	Lrrc47	Leucine-rich repeat-containing protein 47	0.574496	1.14267	-0.219352	0.304976	0.181896	1.5905	-0.318456	0.716242	-2.61227	-0.590743	-1.16409	0.104095	-0.661291	0.834169	0.486995	-0.369837	Cluster -360	amino acid activation;amino acid metabolic process;carboxylic acid metabolic process;cellular aromatic compound metabolic process;cellular metabolic process;cellular nitrogen compound metabolic process;cellular process;heterocycle metabolic process;macromolecule metabolic process;metabolic process;ncRNA metabolic process;nitrogen compound metabolic process;nucleic acid metabolic process;nucleobas…	aminoacyl-tRNA ligase activity;binding;catalytic activity;catalytic activity, acting on a nucleic acid;catalytic activity, acting on a tRNA;catalytic activity, acting on RNA;ligase activity;ligase activity, forming carbon-oxygen bonds;nucleic acid binding;organic cyclic compound binding;phenylalanine-tRNA ligase activity;RNA binding			0.0421839	-0.992896
Q8BP47	Q8BP47	NARS1	NARS1	Asparagine--tRNA ligase, cytoplasmic	0.0613127	0.835773	-0.130276	0.839929	0.405445	1.12568	0.737746	0.574328	-2.51647	-1.40175	-0.725616	0.563354	-0.481412	0.0772715	0.989422	-0.95473	Cluster -360	amino acid activation;amino acid metabolic process;anatomical structure development;asparaginyl-tRNA aminoacylation;carboxylic acid metabolic process;cell migration;cell motility;cellular aromatic compound metabolic process;cellular metabolic process;cellular nitrogen compound metabolic process;cellular process;cerebral cortex development;developmental process;heterocycle metabolic process;macrom…	adenyl nucleotide binding;adenyl ribonucleotide binding;aminoacyl-tRNA ligase activity;anion binding;asparagine-tRNA ligase activity;ATP binding;binding;carbohydrate derivative binding;catalytic activity;catalytic activity, acting on a nucleic acid;catalytic activity, acting on a tRNA;catalytic activity, acting on RNA;CCR chemokine receptor binding;CCR3 chemokine receptor binding;chemokine recept…	cellular anatomical entity;cytoplasm;cytosol;intracellular membrane-bounded organelle;intracellular organelle;membrane-bounded organelle;mitochondrion;organelle	Aminoacyl-tRNA biosynthesis	0.0199366	-1.20636
Q9DCH4	Q9DCH4	Eif3f	Eif3f	Eukaryotic translation initiation factor 3 subunit F	-0.190882	0.610053	0.989097	0.832199	0.586493	1.449	1.25966	-0.330997	-0.783146	-1.81873	-2.116	0.0481909	-0.409763	-0.363028	0.279846	-0.0420021	Cluster -360	cellular component assembly;cellular component organization;cellular component organization or biogenesis;cellular metabolic process;cellular process;formation of cytoplasmic translation initiation complex;IRES-dependent viral translational initiation;macromolecule metabolic process;macromolecule modification;metabolic process;nitrogen compound metabolic process;organic substance metabolic proces…	binding;catalytic activity;catalytic activity, acting on a protein;cysteine-type deubiquitinase activity;cysteine-type peptidase activity;deubiquitinase activity;hydrolase activity;identical protein binding;metal-dependent deubiquitinase activity;metallopeptidase activity;nucleic acid binding;organic cyclic compound binding;peptidase activity;protein binding;translation factor activity, RNA bindi…	cell junction;cellular anatomical entity;eukaryotic 43S preinitiation complex;eukaryotic 48S preinitiation complex;eukaryotic translation initiation factor 3 complex;eukaryotic translation initiation factor 3 complex, eIF3m;protein-containing complex;ribonucleoprotein complex;synapse;translation preinitiation complex	RNA transport	0.00436021	-1.91839
Q8VDM4	Q8VDM4	Psmd2	Psmd2	26S proteasome non-ATPase regulatory subunit 2	0.244674	0.73323	0.574393	0.755199	0.636755	1.15029	0.695807	0.454108	-0.908892	-2.39707	-2.0426	-0.00640733	-0.389611	0.265815	0.328209	-0.0939045	Cluster -360	biological regulation;catabolic process;macromolecule catabolic process;macromolecule metabolic process;metabolic process;modification-dependent macromolecule catabolic process;modification-dependent protein catabolic process;nitrogen compound metabolic process;organic substance catabolic process;organic substance metabolic process;organonitrogen compound catabolic process;organonitrogen compound…	enzyme regulator activity;molecular function regulator activity	catalytic complex;cellular anatomical entity;endopeptidase complex;intracellular membrane-bounded organelle;intracellular non-membrane-bounded organelle;intracellular organelle;intracellular protein-containing complex;membrane-bounded organelle;non-membrane-bounded organelle;nucleus;organelle;peptidase complex;proteasome accessory complex;proteasome complex;proteasome regulatory particle;proteaso…	Proteasome	0.00396469	-1.62423
Q9WVJ2	Q9WVJ2	Psmd13	Psmd13	26S proteasome non-ATPase regulatory subunit 13	0.0635105	0.81751	0.882361	0.710617	0.517457	1.29308	0.896494	0.572206	-1.41759	-2.4016	-1.10703	-0.0739474	-0.90915	0.343042	-0.0533908	-0.133571	Cluster -360	catabolic process;cell cycle process;cellular component organization;cellular component organization or biogenesis;cellular process;macromolecule catabolic process;macromolecule metabolic process;meiosis I;meiosis I cell cycle process;meiotic cell cycle process;meiotic nuclear division;metabolic process;modification-dependent macromolecule catabolic process;modification-dependent protein cataboli…	catalytic activity;catalytic activity, acting on a protein;endopeptidase activity;hydrolase activity;peptidase activity;structural molecule activity	catalytic complex;cellular anatomical entity;cytosol;endopeptidase complex;intracellular membrane-bounded organelle;intracellular organelle;intracellular protein-containing complex;membrane-bounded organelle;nucleus;organelle;peptidase complex;proteasome accessory complex;proteasome complex;proteasome regulatory particle;proteasome regulatory particle, lid subcomplex;protein-containing complex	Proteasome	0.000980653	-1.33667
Q8R1B4	Q8R1B4	Eif3c	Eif3c	Eukaryotic translation initiation factor 3 subunit C	-0.502906	0.506639	0.513499	0.96607	0.750248	2.02474	1.37908	-0.471772	-0.869518	-1.16216	-1.34658	-0.480913	-1.2036	-0.8085	0.3976	0.308068	Cluster -360	cellular component assembly;cellular component organization;cellular component organization or biogenesis;cellular metabolic process;cellular process;formation of cytoplasmic translation initiation complex;metabolic process;protein-containing complex assembly;protein-containing complex organization;protein-RNA complex assembly;protein-RNA complex organization;translational initiation	binding;nucleic acid binding;organic cyclic compound binding;protein binding;protein-containing complex binding;ribonucleoprotein complex binding;ribosome binding;RNA binding;translation factor activity, RNA binding;translation initiation factor activity;translation initiation factor binding;translation regulator activity;translation regulator activity, nucleic acid binding	eukaryotic 43S preinitiation complex;eukaryotic 48S preinitiation complex;eukaryotic translation initiation factor 3 complex;eukaryotic translation initiation factor 3 complex, eIF3m;protein-containing complex;ribonucleoprotein complex;translation preinitiation complex	RNA transport	0.00477789	-1.44061
Q61990	Q61990	Pcbp2	Pcbp2	Poly(rC)-binding protein 2	0.31526	0.60152	1.46189	0.558692	0.764027	0.225159	0.300846	0.233016	-0.463219	-1.88913	-2.00032	0.217235	-1.66205	0.16819	0.536502	0.632375	Cluster -360	aromatic compound biosynthetic process;biological process involved in interspecies interaction between organisms;biological regulation;biosynthetic process;catabolic process;cellular aromatic compound metabolic process;cellular biosynthetic process;cellular metabolic process;cellular nitrogen compound biosynthetic process;cellular nitrogen compound metabolic process;cellular process;defense respo…	binding;C-rich single-stranded DNA binding;DNA binding;enzyme binding;mRNA binding;nucleic acid binding;organic cyclic compound binding;protein binding;RNA binding;single-stranded DNA binding;ubiquitin protein ligase binding;ubiquitin-like protein ligase binding	cellular anatomical entity;cytoplasm;cytosol;intracellular membrane-bounded organelle;intracellular organelle;membrane-bounded organelle;nucleoplasm;nucleus;organelle;postsynaptic density;postsynaptic specialization;protein-containing complex;ribonucleoprotein complex		0.0195803	-1.75766
O54734	O54734	Ddost	Ddost	Dolichyl-diphosphooligosaccharide--protein glycosyltransferase 48 kDa subunit	0.0228894	0.496341	1.168	0.898176	1.11193	0.435607	-0.452246	0.18352	-0.237854	-1.76951	-1.73851	0.589195	-1.82589	-0.242228	0.534688	0.825885	Cluster -360	biological regulation;cell activation;cellular process;glycosylation;immune system process;leukocyte activation;lymphocyte activation;macromolecule glycosylation;macromolecule metabolic process;macromolecule modification;metabolic process;multicellular organismal process;nitrogen compound metabolic process;organic substance metabolic process;organonitrogen compound metabolic process;primary metab…	enzyme activator activity;enzyme regulator activity;molecular function activator activity;molecular function regulator activity	catalytic complex;cellular anatomical entity;endoplasmic reticulum;endoplasmic reticulum membrane;endoplasmic reticulum protein-containing complex;intracellular membrane-bounded organelle;intracellular organelle;membrane;membrane protein complex;membrane-bounded organelle;oligosaccharyltransferase complex;organelle;organelle membrane;protein-containing complex;transferase complex	N-Glycan biosynthesis;Protein processing in endoplasmic reticulum;Various types of N-glycan biosynthesis	0.0491734	-1.27512
P62301	P62301	Rps13	Rps13	Small ribosomal subunit protein uS15	0.0879017	0.914139	0.861247	0.873277	1.12606	0.0582766	1.00356	-0.11354	-0.745855	-1.41066	-2.05582	-0.102069	-1.50347	-0.472344	0.734436	0.744866	Cluster -360	amide biosynthetic process;amide metabolic process;biological regulation;biosynthetic process;cellular biosynthetic process;cellular component biogenesis;cellular component organization or biogenesis;cellular metabolic process;cellular nitrogen compound biosynthetic process;cellular nitrogen compound metabolic process;cellular process;cytoplasmic translation;macromolecule biosynthetic process;mac…	5.8S rRNA binding;binding;mRNA 5'-UTR binding;mRNA binding;nucleic acid binding;organic cyclic compound binding;RNA binding;rRNA binding;small ribosomal subunit rRNA binding;structural constituent of ribosome;structural molecule activity	cell junction;cellular anatomical entity;cytoplasm;cytosol;cytosolic ribosome;cytosolic small ribosomal subunit;intracellular membrane-bounded organelle;intracellular non-membrane-bounded organelle;intracellular organelle;membrane-bounded organelle;non-membrane-bounded organelle;nucleolus;nucleus;organelle;postsynaptic density;postsynaptic specialization;preribosome;protein-containing complex;rib…	Ribosome	0.0102347	-1.96894
O55142	O55142	Rpl35a	Rpl35a	Large ribosomal subunit protein eL33	0.0727124	0.811223	0.876016	0.831021	1.07425	0.415891	0.801121	0.0026357	-0.745559	-2.04038	-2.18215	0.258801	-0.841089	-0.339596	0.371719	0.63338	Cluster -360	amide biosynthetic process;amide metabolic process;biosynthetic process;cellular aromatic compound metabolic process;cellular biosynthetic process;cellular component biogenesis;cellular component organization or biogenesis;cellular metabolic process;cellular nitrogen compound biosynthetic process;cellular nitrogen compound metabolic process;cellular process;cytoplasmic translation;heterocycle met…	structural constituent of ribosome;structural molecule activity	cell junction;cellular anatomical entity;cytoplasm;cytosol;cytosolic large ribosomal subunit;cytosolic ribosome;intracellular membrane-bounded organelle;intracellular non-membrane-bounded organelle;intracellular organelle;large ribosomal subunit;membrane-bounded organelle;mitochondrion;non-membrane-bounded organelle;organelle;postsynapse;presynapse;protein-containing complex;ribonucleoprotein com…	Ribosome	0.00881564	-2.38913
Q9CPR4	Q9CPR4	Rpl17	Rpl17	Large ribosomal subunit protein uL22	0.0483183	0.780364	0.593679	0.830173	1.01207	0.652667	0.833009	-0.134219	-0.00288858	-1.66981	-2.37593	0.218996	-1.39347	-0.43915	0.418794	0.627399	Cluster -360	amide biosynthetic process;amide metabolic process;biological regulation;biosynthetic process;cellular biosynthetic process;cellular metabolic process;cellular nitrogen compound biosynthetic process;cellular nitrogen compound metabolic process;cellular process;cytoplasmic translation;macromolecule biosynthetic process;macromolecule metabolic process;metabolic process;nitrogen compound metabolic p…	binding;large ribosomal subunit rRNA binding;nucleic acid binding;organic cyclic compound binding;RNA binding;rRNA binding;structural constituent of ribosome;structural molecule activity	A band;cell junction;cellular anatomical entity;cytoplasm;cytosol;cytosolic large ribosomal subunit;cytosolic ribosome;intracellular non-membrane-bounded organelle;intracellular organelle;large ribosomal subunit;non-membrane-bounded organelle;organelle;postsynapse;presynapse;protein-containing complex;ribonucleoprotein complex;ribosomal subunit;ribosome;synapse	Ribosome	0.0148463	-2.10135
P14148	P14148	Rpl7	Rpl7	Large ribosomal subunit protein uL30	0.0292555	0.733469	0.639764	0.846331	1.18965	0.729912	0.824285	-0.111206	0.121438	-1.42873	-2.10265	0.114125	-1.82904	-0.656302	0.338752	0.560946	Cluster -360	amide biosynthetic process;amide metabolic process;biosynthetic process;cellular aromatic compound metabolic process;cellular biosynthetic process;cellular component biogenesis;cellular component organization or biogenesis;cellular metabolic process;cellular nitrogen compound biosynthetic process;cellular nitrogen compound metabolic process;cellular process;cytoplasmic translation;heterocycle met…	5S rRNA binding;binding;DNA binding;identical protein binding;mRNA binding;nucleic acid binding;organic cyclic compound binding;protein binding;RNA binding;rRNA binding;structural constituent of ribosome;structural molecule activity	A band;cell junction;cellular anatomical entity;cytoplasm;cytosol;cytosolic large ribosomal subunit;cytosolic ribosome;intracellular non-membrane-bounded organelle;intracellular organelle;large ribosomal subunit;non-membrane-bounded organelle;organelle;polysome;postsynapse;postsynaptic density;postsynaptic specialization;presynapse;protein-containing complex;ribonucleoprotein complex;ribosomal su…	Ribosome	0.00887737	-2.06679
P19253	P19253	Rpl13a	Rpl13a	Large ribosomal subunit protein uL13	0.214314	0.863816	0.7565	1.00978	1.15331	0.824544	0.886821	0.0541323	-1.07723	-1.21636	-1.90814	0.161024	-1.76697	-0.466583	0.395611	0.115424	Cluster -360	amide biosynthetic process;amide metabolic process;anatomical structure morphogenesis;animal organ morphogenesis;biological regulation;biosynthetic process;cell chemotaxis;cell migration;cell motility;cellular biosynthetic process;cellular metabolic process;cellular nitrogen compound biosynthetic process;cellular nitrogen compound metabolic process;cellular process;cellular response to chemical s…	binding;mRNA binding;nucleic acid binding;organic cyclic compound binding;RNA binding;structural constituent of ribosome;structural molecule activity	cell junction;cellular anatomical entity;cytoplasm;cytosol;cytosolic large ribosomal subunit;cytosolic ribosome;GAIT complex;intracellular non-membrane-bounded organelle;intracellular organelle;large ribosomal subunit;non-membrane-bounded organelle;organelle;postsynapse;presynapse;protein-containing complex;ribonucleoprotein complex;ribosomal subunit;ribosome;synapse	Ribosome	0.000950364	-2.82782
Q8CGC7	Q8CGC7	Eprs1	Eprs1	Bifunctional glutamate/proline--tRNA ligase	0.0825462	1.06871	0.358535	0.895465	0.718651	0.660416	1.37667	-0.122015	-0.910381	-1.24057	-1.95891	0.157885	-1.76901	-0.330145	0.702621	0.309527	Cluster -360	amino acid activation;amino acid metabolic process;biological regulation;carboxylic acid metabolic process;cellular aromatic compound metabolic process;cellular metabolic process;cellular nitrogen compound metabolic process;cellular process;cellular response to chemical stimulus;cellular response to cytokine stimulus;cellular response to endogenous stimulus;cellular response to hormone stimulus;c…	adenyl nucleotide binding;adenyl ribonucleotide binding;aminoacyl-tRNA ligase activity;anion binding;ATP binding;binding;carbohydrate derivative binding;catalytic activity;catalytic activity, acting on a nucleic acid;catalytic activity, acting on a tRNA;catalytic activity, acting on RNA;cation binding;enzyme binding;glutamate-tRNA ligase activity;GTPase binding;heterocyclic compound binding;ident…	aminoacyl-tRNA synthetase multienzyme complex;catalytic complex;cellular anatomical entity;cytoplasm;cytosol;GAIT complex;intracellular protein-containing complex;membrane;plasma membrane;protein-containing complex;ribonucleoprotein complex	Aminoacyl-tRNA biosynthesis;Porphyrin and chlorophyll metabolism	0.00635832	-1.87137
O55029	O55029	Copb2	Copb2	Coatomer subunit beta'	0.0310071	0.974706	0.483806	0.859122	0.8503	0.468185	0.561238	0.0296995	-1.0865	-0.59645	-2.45903	0.18921	-1.74378	-0.0795507	0.741596	0.776436	Cluster -360	cellular localization;cellular macromolecule localization;cellular process;endoplasmic reticulum to Golgi vesicle-mediated transport;establishment of localization;establishment of localization in cell;establishment of protein localization;Golgi vesicle transport;intracellular protein transport;intracellular transport;intra-Golgi vesicle-mediated transport;localization;macromolecule localization;n…	binding;enzyme binding;kinase binding;protein binding;protein kinase binding;protein kinase C binding;structural molecule activity	bounding membrane of organelle;cellular anatomical entity;COPI vesicle coat;cytosol;Golgi apparatus;Golgi membrane;intracellular membrane-bounded organelle;intracellular organelle;membrane;membrane coat;membrane protein complex;membrane-bounded organelle;organelle;organelle membrane;protein-containing complex;vesicle coat		0.0273909	-1.61956
P60335;Q61990	P60335	Pcbp1;Pcbp2	Pcbp1	Poly(rC)-binding protein 1	-0.233647	0.616161	1.4307	0.819095	0.626037	0.097933	0.321472	0.4675	-1.24781	-2.06689	-0.48377	0.334422	-2.04522	0.175208	0.473176	0.715616	Cluster -360	aromatic compound biosynthetic process;biological regulation;biosynthetic process;cellular aromatic compound metabolic process;cellular biosynthetic process;cellular metabolic process;cellular nitrogen compound biosynthetic process;cellular nitrogen compound metabolic process;cellular process;heterocycle biosynthetic process;heterocycle metabolic process;macromolecule biosynthetic process;macromo…	binding;DNA binding;DNA-binding transcription factor activity;DNA-binding transcription factor activity, RNA polymerase II-specific;mRNA 3'-UTR binding;mRNA binding;nucleic acid binding;organic cyclic compound binding;RNA binding;sequence-specific DNA binding;sequence-specific single stranded DNA binding;single-stranded DNA binding;transcription regulator activity;translation activator activity;t…	cellular anatomical entity;cytoplasm;cytoplasmic ribonucleoprotein granule;cytosol;intracellular membrane-bounded organelle;intracellular non-membrane-bounded organelle;intracellular organelle;membrane-bounded organelle;non-membrane-bounded organelle;nuclear body;nuclear speck;nucleoplasm;nucleus;organelle;postsynaptic density;postsynaptic specialization;protein-containing complex;ribonucleoprote…	Spliceosome	0.0326716	-1.38255
P60843	P60843	Eif4a1	Eif4a1	Eukaryotic initiation factor 4A-I	0.0237261	0.702499	1.13354	0.791141	1.0748	0.126083	0.323973	0.378536	-1.10007	-1.4594	-1.11242	0.301847	-2.36218	-0.116373	0.452031	0.842267	Cluster -360	cellular metabolic process;cellular process;cytoplasmic translational initiation;metabolic process;translational initiation	adenyl nucleotide binding;adenyl ribonucleotide binding;anion binding;ATP binding;ATP hydrolysis activity;ATP-dependent activity;ATP-dependent activity, acting on RNA;binding;carbohydrate derivative binding;catalytic activity;catalytic activity, acting on a nucleic acid;catalytic activity, acting on RNA;double-stranded RNA binding;helicase activity;heterocyclic compound binding;hydrolase activity…	cellular anatomical entity;cytoplasm;eukaryotic translation initiation factor 4F complex;intracellular protein-containing complex;protein-containing complex;RNA cap binding complex	RNA transport	0.0166035	-1.78894
Q64511	Q64511	Top2b	Top2b	DNA topoisomerase 2-beta	1.65713	0.502167	1.69445	-0.247	0.167086	-0.46454	0.576706	0.768087	-0.542563	-0.432765	-1.70535	-0.472193	-0.187377	0.407313	0.28142	-2.00257	Cluster -360	anatomical structure development;anatomical structure morphogenesis;axonogenesis;B cell activation;B cell differentiation;biological regulation;cell activation;cell cycle process;cell differentiation;cell migration;cell motility;cell projection morphogenesis;cell projection organization;cellular anatomical entity morphogenesis;cellular aromatic compound metabolic process;cellular component organi…	adenyl nucleotide binding;adenyl ribonucleotide binding;anion binding;ATP binding;ATP-dependent activity;ATP-dependent activity, acting on DNA;binding;carbohydrate derivative binding;catalytic activity;catalytic activity, acting on a nucleic acid;catalytic activity, acting on DNA;cation binding;chromatin binding;DNA binding;DNA topoisomerase activity;DNA topoisomerase type II (double strand cut, …	cellular anatomical entity;cytosol;intracellular membrane-bounded organelle;intracellular non-membrane-bounded organelle;intracellular organelle;membrane-bounded organelle;non-membrane-bounded organelle;nucleolus;nucleoplasm;nucleus;organelle;protein-containing complex;ribonucleoprotein complex		0.0138387	-1.31708	TOP2B
P12970	P12970	Rpl7a	Rpl7a	Large ribosomal subunit protein eL8	-0.162378	0.899601	0.492564	0.890868	1.31798	0.604361	0.936568	-0.188344	0.0920632	-1.61511	-0.824991	-0.0269432	-2.38215	-0.883029	0.429165	0.419764	Cluster -360	amide biosynthetic process;amide metabolic process;biosynthetic process;cellular aromatic compound metabolic process;cellular biosynthetic process;cellular metabolic process;cellular nitrogen compound biosynthetic process;cellular nitrogen compound metabolic process;cellular process;cytoplasmic translation;heterocycle metabolic process;macromolecule biosynthetic process;macromolecule metabolic pr…	binding;nucleic acid binding;organic cyclic compound binding;RNA binding;structural constituent of ribosome;structural molecule activity	cell junction;cellular anatomical entity;cytoplasm;cytosol;cytosolic large ribosomal subunit;cytosolic ribosome;intracellular non-membrane-bounded organelle;intracellular organelle;large ribosomal subunit;membrane;non-membrane-bounded organelle;nucleolus;organelle;polysomal ribosome;postsynapse;presynapse;protein-containing complex;ribonucleoprotein complex;ribosomal subunit;ribosome;synapse	Ribosome	0.0106415	-1.75913
P53026	P53026	Rpl10a	Rpl10a	Large ribosomal subunit protein uL1	0.920005	0.642789	0.920005	0.786751	0.820259	0.153894	1.2504	-0.446451	-1.00254	-1.62832	-0.446649	-0.313847	-2.20329	-0.560726	0.752306	0.355421	Cluster -360	amide biosynthetic process;amide metabolic process;biosynthetic process;cellular aromatic compound metabolic process;cellular biosynthetic process;cellular metabolic process;cellular nitrogen compound biosynthetic process;cellular nitrogen compound metabolic process;cellular process;cytoplasmic translation;heterocycle metabolic process;macromolecule biosynthetic process;macromolecule metabolic pr…	binding;nucleic acid binding;organic cyclic compound binding;RNA binding;structural constituent of ribosome;structural molecule activity	cell junction;cellular anatomical entity;cytoplasm;cytosol;cytosolic large ribosomal subunit;cytosolic ribosome;intracellular membrane-bounded organelle;intracellular non-membrane-bounded organelle;intracellular organelle;large ribosomal subunit;membrane-bounded organelle;mitochondrion;non-membrane-bounded organelle;organelle;polysomal ribosome;postsynapse;postsynaptic density;postsynaptic specia…		0.00623835	-1.47706
P62889	P62889	Rpl30	Rpl30	Large ribosomal subunit protein eL30	0.120112	0.733855	0.904253	0.798369	0.786322	0.338049	1.18719	0.0670746	-1.47937	-1.76761	-0.697593	0.231239	-2.0319	-0.342552	0.779014	0.37355	Cluster -360	amide biosynthetic process;amide metabolic process;antimicrobial humoral immune response mediated by antimicrobial peptide;antimicrobial humoral response;biological process involved in interspecies interaction between organisms;biosynthetic process;cell killing;cellular biosynthetic process;cellular metabolic process;cellular nitrogen compound biosynthetic process;cellular nitrogen compound metab…	binding;mRNA binding;nucleic acid binding;organic cyclic compound binding;RNA binding;selenocysteine insertion sequence binding;structural constituent of ribosome;structural molecule activity	cell junction;cellular anatomical entity;cytoplasm;cytosol;cytosolic large ribosomal subunit;cytosolic ribosome;intracellular membrane-bounded organelle;intracellular non-membrane-bounded organelle;intracellular organelle;large ribosomal subunit;membrane-bounded organelle;non-membrane-bounded organelle;nucleus;organelle;polysomal ribosome;postsynapse;postsynaptic density;postsynaptic specializati…	Ribosome	0.00794198	-2.0103
Q8BP67	Q8BP67	Rpl24	Rpl24	Large ribosomal subunit protein eL24	0.0179888	0.864248	0.722555	0.959916	1.21502	0.64938	0.818173	-0.179548	-1.22291	-1.19586	-0.870877	0.13387	-2.44684	-0.340001	0.33174	0.543147	Cluster -360	amide biosynthetic process;amide metabolic process;anatomical structure development;axon guidance;biosynthetic process;cell cycle phase transition;cell cycle process;cell projection organization;cellular biosynthetic process;cellular component assembly;cellular component organization;cellular component organization or biogenesis;cellular metabolic process;cellular nitrogen compound biosynthetic p…	binding;mRNA binding;nucleic acid binding;organic cyclic compound binding;RNA binding;structural constituent of ribosome;structural molecule activity	cell junction;cellular anatomical entity;cytoplasm;cytosol;cytosolic large ribosomal subunit;cytosolic ribosome;endoplasmic reticulum;intracellular membrane-bounded organelle;intracellular non-membrane-bounded organelle;intracellular organelle;large ribosomal subunit;membrane-bounded organelle;non-membrane-bounded organelle;organelle;polysomal ribosome;postsynapse;presynapse;protein-containing co…	Ribosome	0.00596738	-2.06126
P25444	P25444	Rps2	Rps2	Small ribosomal subunit protein uS5	0.0835313	0.775164	0.802843	0.872506	1.11117	0.628723	0.864106	-0.107376	-0.444861	-1.28578	-1.30794	0.306649	-2.52616	-0.513016	0.478522	0.261914	Cluster -360	amide biosynthetic process;amide metabolic process;biosynthetic process;cellular biosynthetic process;cellular metabolic process;cellular nitrogen compound biosynthetic process;cellular nitrogen compound metabolic process;cellular process;cellular response to chemical stimulus;cellular response to cytokine stimulus;cellular response to interleukin-4;cellular response to organic substance;cellular…	binding;enzyme binding;fibroblast growth factor binding;growth factor binding;mRNA binding;nucleic acid binding;organic cyclic compound binding;protein binding;protein-containing complex binding;RNA binding;structural constituent of ribosome;structural molecule activity	cell junction;cellular anatomical entity;cytoplasm;cytosol;cytosolic ribosome;cytosolic small ribosomal subunit;intracellular non-membrane-bounded organelle;intracellular organelle;non-membrane-bounded organelle;nucleolus;nucleoplasm;organelle;postsynapse;protein-containing complex;ribonucleoprotein complex;ribosomal subunit;ribosome;small ribosomal subunit;synapse	Ribosome	0.00647505	-2.14935
P62908	P62908	Rps3	Rps3	Small ribosomal subunit protein uS3	0.0126854	0.874784	1.05332	0.864104	0.770386	0.215918	1.2147	-0.00987135	-0.933348	-1.44639	-1.19654	0.142973	-2.23551	-0.440296	0.691687	0.42141	Cluster -360	amide biosynthetic process;amide metabolic process;apoptotic process;base-excision repair;biological regulation;biosynthetic process;cell cycle process;cell death;cell division;cellular aromatic compound metabolic process;cellular biosynthetic process;cellular component assembly;cellular component organization;cellular component organization or biogenesis;cellular metabolic process;cellular nitro…	binding;carbon-oxygen lyase activity;catalytic activity;catalytic activity, acting on a nucleic acid;catalytic activity, acting on DNA;class I DNA-(apurinic or apyrimidinic site) endonuclease activity;cytoskeletal protein binding;damaged DNA binding;DNA binding;DNA endonuclease activity;DNA nuclease activity;DNA-(apurinic or apyrimidinic site) endonuclease activity;DNA-binding transcription facto…	cell junction;cell projection;cell projection membrane;cellular anatomical entity;cytoplasm;cytosol;cytosolic ribosome;cytosolic small ribosomal subunit;dendrite;endoplasmic reticulum;intracellular membrane-bounded organelle;intracellular non-membrane-bounded organelle;intracellular organelle;intracellular organelle lumen;leading edge membrane;membrane;membrane-bounded organelle;membrane-enclosed…	Ribosome	0.0069802	-2.14944
Q9CXW4	Q9CXW4	Rpl11	Rpl11	Large ribosomal subunit protein uL5	-0.11002	0.694049	1.2603	0.942675	1.02959	0.146876	0.987115	-0.0762423	-0.629987	-1.37645	-1.2442	0.174802	-2.28742	-0.55966	0.556191	0.49237	Cluster -360	amide biosynthetic process;amide metabolic process;biological regulation;biosynthetic process;cellular aromatic compound metabolic process;cellular biosynthetic process;cellular component assembly;cellular component biogenesis;cellular component organization;cellular component organization or biogenesis;cellular localization;cellular macromolecule localization;cellular metabolic process;cellular …	5S rRNA binding;binding;enzyme binding;enzyme inhibitor activity;enzyme regulator activity;molecular function inhibitor activity;molecular function regulator activity;nucleic acid binding;organic cyclic compound binding;peroxisome proliferator activated receptor binding;protein binding;RNA binding;rRNA binding;signaling receptor binding;structural constituent of ribosome;structural molecule activ…	cell junction;cellular anatomical entity;cytoplasm;cytosol;cytosolic large ribosomal subunit;cytosolic ribosome;intracellular non-membrane-bounded organelle;intracellular organelle;large ribosomal subunit;non-membrane-bounded organelle;nucleolus;nucleoplasm;organelle;polysomal ribosome;protein-containing complex;ribonucleoprotein complex;ribosomal subunit;ribosome;synapse	Ribosome	0.00900749	-1.82491
P62270	P62270	Rps18	Rps18	Small ribosomal subunit protein uS13	-0.217846	0.725532	0.898982	0.966769	1.22353	0.0490891	0.987557	-0.277106	-0.447138	-1.89517	-0.436923	-0.0440159	-2.13043	-0.791433	0.598854	0.789749	Cluster -360	amide biosynthetic process;amide metabolic process;biosynthetic process;cellular biosynthetic process;cellular metabolic process;cellular nitrogen compound biosynthetic process;cellular nitrogen compound metabolic process;cellular process;cytoplasmic translation;macromolecule biosynthetic process;macromolecule metabolic process;metabolic process;nitrogen compound metabolic process;organic substan…	binding;enzyme binding;kinase binding;nucleic acid binding;organic cyclic compound binding;protein binding;protein kinase binding;RNA binding;rRNA binding;structural constituent of ribosome;structural molecule activity	cell junction;cellular anatomical entity;cytoplasm;cytosol;cytosolic ribosome;cytosolic small ribosomal subunit;intracellular membrane-bounded organelle;intracellular non-membrane-bounded organelle;intracellular organelle;membrane-bounded organelle;non-membrane-bounded organelle;nucleus;organelle;postsynapse;postsynaptic density;postsynaptic specialization;protein-containing complex;ribonucleopro…	Ribosome	0.0233394	-1.51555
P14131	P14131	Rps16	Rps16	Small ribosomal subunit protein uS9	0.0761694	0.526834	0.999871	0.911814	1.03056	0.294129	0.7704	-0.163277	-0.294759	-2.58417	-0.577408	0.202007	-1.7359	-0.57793	0.535204	0.586456	Cluster -360	amide biosynthetic process;amide metabolic process;biosynthetic process;cellular aromatic compound metabolic process;cellular biosynthetic process;cellular component biogenesis;cellular component organization or biogenesis;cellular metabolic process;cellular nitrogen compound biosynthetic process;cellular nitrogen compound metabolic process;cellular process;cellular response to chemical stimulus;…	binding;nucleic acid binding;organic cyclic compound binding;RNA binding;structural constituent of ribosome;structural molecule activity	cell junction;cellular anatomical entity;cytoplasm;cytosol;cytosolic ribosome;cytosolic small ribosomal subunit;intracellular non-membrane-bounded organelle;intracellular organelle;non-membrane-bounded organelle;nucleolus;organelle;postsynapse;preribosome;presynapse;protein-containing complex;ribonucleoprotein complex;ribosomal subunit;ribosome;small ribosomal subunit;small-subunit processome;syn…	Ribosome	0.0200545	-1.81033
P62281	P62281	Rps11	Rps11	Small ribosomal subunit protein uS17	0.0580395	0.847324	0.821952	1.03704	1.29225	0.669677	0.954187	-0.183626	-1.14663	-1.95304	-1.34682	-0.0383754	-1.14488	-0.846013	0.403156	0.575753	Cluster -360	amide biosynthetic process;amide metabolic process;biosynthetic process;cellular biosynthetic process;cellular component biogenesis;cellular component organization or biogenesis;cellular metabolic process;cellular nitrogen compound biosynthetic process;cellular nitrogen compound metabolic process;cellular process;cytoplasmic translation;macromolecule biosynthetic process;macromolecule metabolic p…	binding;nucleic acid binding;organic cyclic compound binding;RNA binding;rRNA binding;structural constituent of ribosome;structural molecule activity	cell junction;cellular anatomical entity;cytoplasm;cytosol;cytosolic ribosome;cytosolic small ribosomal subunit;intracellular non-membrane-bounded organelle;intracellular organelle;non-membrane-bounded organelle;nucleolus;organelle;postsynapse;preribosome;presynapse;protein-containing complex;ribonucleoprotein complex;ribosomal subunit;ribosome;small ribosomal subunit;small-subunit processome;syn…	Ribosome	0.00207558	-1.97009
P62852	P62852	Rps25	Rps25	Small ribosomal subunit protein eS25	0.143135	0.572298	0.888598	0.755991	0.951618	0.729364	1.01397	0.00114459	-0.937059	-2.35255	-0.989417	-0.0459001	-1.56245	-0.432048	0.684949	0.578351	Cluster -360	amide biosynthetic process;amide metabolic process;biosynthetic process;cellular aromatic compound metabolic process;cellular biosynthetic process;cellular component assembly;cellular component biogenesis;cellular component organization;cellular component organization or biogenesis;cellular metabolic process;cellular nitrogen compound biosynthetic process;cellular nitrogen compound metabolic proc…	structural constituent of ribosome;structural molecule activity	cell junction;cellular anatomical entity;cytoplasm;cytosol;cytosolic ribosome;cytosolic small ribosomal subunit;intracellular membrane-bounded organelle;intracellular non-membrane-bounded organelle;intracellular organelle;membrane-bounded organelle;non-membrane-bounded organelle;nucleolus;nucleus;organelle;postsynaptic density;postsynaptic specialization;protein-containing complex;ribonucleoprote…	Ribosome	0.00612286	-2.43433
P23475	P23475	Xrcc6	Xrcc6	X-ray repair cross-complementing protein 6	0.744872	0.813118	1.39295	0.209697	0.403514	-1.25109	1.8425	0.143669	-0.675864	-0.299137	-1.00578	-1.35588	-1.294	-0.459315	1.12403	-0.333284	Cluster -360	activation of immune response;activation of innate immune response;biological process involved in interspecies interaction between organisms;biological regulation;cell differentiation;cellular aromatic compound metabolic process;cellular component organization;cellular component organization or biogenesis;cellular developmental process;cellular hyperosmotic response;cellular hyperosmotic salinity…	5'-deoxyribose-5-phosphate lyase activity;adenyl nucleotide binding;adenyl ribonucleotide binding;anion binding;ATP binding;ATP hydrolysis activity;ATP-dependent activity;ATP-dependent activity, acting on DNA;binding;carbohydrate derivative binding;carbon-oxygen lyase activity;catalytic activity;catalytic activity, acting on a nucleic acid;catalytic activity, acting on DNA;cyclin binding;damaged …	catalytic complex;cellular anatomical entity;chromosome;cytoplasm;DNA repair complex;DNA-dependent protein kinase complex;intracellular membrane-bounded organelle;intracellular non-membrane-bounded organelle;intracellular organelle;intracellular protein-containing complex;Ku70:Ku80 complex;membrane-bounded organelle;nonhomologous end joining complex;non-membrane-bounded organelle;nuclear protein-…	Non-homologous end-joining	0.0256361	-1.61001	XRCC6
P62242	P62242	Rps8	Rps8	Small ribosomal subunit protein eS8	0.0765126	0.773239	0.512312	0.846806	1.03822	0.882338	0.916395	0.00995988	-0.734279	-2.07043	-0.832133	0.229764	-2.11587	-0.473679	0.418362	0.52249	Cluster -360	amide biosynthetic process;amide metabolic process;biosynthetic process;cellular aromatic compound metabolic process;cellular biosynthetic process;cellular component biogenesis;cellular component organization or biogenesis;cellular metabolic process;cellular nitrogen compound biosynthetic process;cellular nitrogen compound metabolic process;cellular process;cytoplasmic translation;heterocycle met…	structural constituent of ribosome;structural molecule activity	cellular anatomical entity;cytoplasm;cytosol;cytosolic ribosome;cytosolic small ribosomal subunit;endoplasmic reticulum;intracellular membrane-bounded organelle;intracellular non-membrane-bounded organelle;intracellular organelle;membrane;membrane-bounded organelle;non-membrane-bounded organelle;nucleolus;organelle;preribosome;protein-containing complex;ribonucleoprotein complex;ribosomal subunit…	Ribosome	0.00612746	-2.22551
[truncated: 37 more rows]
