# Supplementary material for: Extracellular Vesicle Profiling Reveals Novel Autism Signatures in Patient-Derived Forebrain Organoids
Source: Research Square preprint supplement (doi:10.21203/rs.3.rs-6573757/v1), 2025-05-12
Supplement: Supplementary file 4 [file 56f6183453c8025d0870dd2e.xlsx]

## Sheet: ALL
baseMean	log2FoldChange	lfcSE	stat	pvalue	padj	gene_name
43.1115	6.51507	1.11077	5.86538	4.48e-09	4.3e-05	LRRN2
3636.7	-7.10187	1.2486	-5.68787	1.29e-08	6.17e-05	RNY4P17
114.861	7.26996	1.34427	5.40811	6.37e-08	0.000204	ATP6V1B2
54.4631	5.67473	1.11892	5.07163	3.94e-07	0.00086	EML4
33.7713	-8.2442	1.63344	-5.04714	4.48e-07	0.00086	AL049872.1
22.7315	-7.32827	1.46914	-4.98813	6.1e-07	0.000975	TTC4
36.4275	-8.75905	1.79347	-4.88385	1.04e-06	0.00142569	PTMAP12
50.3083	6.32259	1.32196	4.78275	1.73e-06	0.00207342	PES1
32.0419	5.74941	1.22383	4.69789	2.63e-06	0.00280189	AL591848.2
20.7847	6.24488	1.38841	4.49785	6.86e-06	0.00591224	CMTM1
11.3232	-6.03389	1.34626	-4.48197	7.4e-06	0.00591224	AL592295.1
17.6711	-7.42245	1.64605	-4.50925	6.51e-06	0.00591224	MIR6724-4
15.2709	4.97464	1.1224	4.43216	9.33e-06	0.0068844	SLC5A11
11.5573	6.40058	1.45739	4.3918	1.12e-05	0.0077028	SP140
25.4426	7.5424	1.73202	4.35469	1.33e-05	0.00852216	AC010223.1
13.3935	-4.21332	0.979873	-4.29986	1.71e-05	0.00964415	DOCK11
17.4489	-7.15748	1.66048	-4.31049	1.63e-05	0.00964415	MIR6724-3
10.9783	-7.03495	1.64707	-4.27119	1.94e-05	0.010362	AL663070.2
53.7834	-5.58546	1.31794	-4.23802	2.26e-05	0.0108163	NARS1
74.373	-6.18575	1.45671	-4.24639	2.17e-05	0.0108163	LIPM
15.8027	-6.13198	1.45908	-4.20263	2.64e-05	0.0120521	DYRK2
19.1579	5.61279	1.34436	4.17506	2.98e-05	0.0124372	KIAA2012
19.3433	-7.84614	1.87939	-4.17484	2.98e-05	0.0124372	MIR4676
14.4187	6.33493	1.52393	4.15696	3.23e-05	0.0128907	AC020915.2
23.9226	5.7668	1.40108	4.11598	3.86e-05	0.0130749	MATN3
48.9418	5.29975	1.28912	4.11114	3.94e-05	0.0130749	NELFA
41.0554	4.40592	1.06681	4.12999	3.63e-05	0.0130749	OPRD1
12.2581	-6.78115	1.64982	-4.11023	3.95e-05	0.0130749	ANAPC13
10.0214	-6.89981	1.67376	-4.12235	3.75e-05	0.0130749	RPL23AP57
14.7503	4.76412	1.16238	4.09858	4.16e-05	0.0132924	DNAJA4
25.3596	5.6584	1.38584	4.08301	4.45e-05	0.0133273	PITRM1
17.183	-6.93797	1.69717	-4.08797	4.35e-05	0.0133273	MIR6724-2
50.5545	-5.85974	1.43922	-4.07148	4.67e-05	0.0135802	PLEKHH1
12.5976	-6.30968	1.55393	-4.06047	4.9e-05	0.0138177	AC006509.1
32.5036	-4.87973	1.20789	-4.03988	5.35e-05	0.014658	PALD1
23.8125	-5.84575	1.4534	-4.02212	5.77e-05	0.015369	ANO6
43.7867	5.54661	1.38518	4.00426	6.22e-05	0.01613	RFPL1S
41.5205	5.2284	1.31308	3.98179	6.84e-05	0.0167975	ZW10
22.6678	-4.50063	1.13191	-3.97615	7e-05	0.0167975	KIDINS220
19.7064	-4.95153	1.24472	-3.97804	6.95e-05	0.0167975	JUN
86.1761	4.26164	1.07825	3.95235	7.74e-05	0.0173193	CHCHD7
45.8014	-5.05792	1.28112	-3.94804	7.88e-05	0.0173193	TNFRSF10D
57.9179	-5.209	1.32004	-3.94609	7.94e-05	0.0173193	CLN8
12.0724	-6.05635	1.53312	-3.95034	7.8e-05	0.0173193	H2BC10
4.60247	5.51052	1.40287	3.92805	8.56e-05	0.0182563	MARCHF3
13.596	6.29996	1.62445	3.87822	0.000105	0.0190724	AC013356.4
53.551	4.47591	1.1523	3.88432	0.000103	0.0190724	FGD2
20.9898	-3.32146	0.851444	-3.90097	9.58e-05	0.0190724	DMKN
28.3324	-3.54821	0.913344	-3.88485	0.000102	0.0190724	PARD6A
16.8748	-3.99879	1.03048	-3.88049	0.000104	0.0190724	CARM1
13.556	-5.38001	1.37948	-3.90003	9.62e-05	0.0190724	POLR3B
18.5934	-5.62928	1.44502	-3.89564	9.79e-05	0.0190724	EIF3L
7.3384	-5.90614	1.52303	-3.87788	0.000105	0.0190724	AC093909.5
12.038	6.45589	1.68373	3.83428	0.000126	0.0214497	CD163L1
10.7047	6.29947	1.64317	3.83373	0.000126	0.0214497	ZNF667
15.5358	5.20928	1.35828	3.83521	0.000125	0.0214497	FOXP2
74.742	-5.29417	1.38181	-3.83133	0.000127	0.0214497	PPP1CA
9.84732	6.16024	1.62052	3.8014	0.000144	0.0221052	AC093458.2
11.4844	6.01131	1.57915	3.80668	0.000141	0.0221052	LEF1-AS1
21.2401	4.10952	1.07603	3.81913	0.000134	0.0221052	PYY
15.0408	3.60942	0.950051	3.79919	0.000145	0.0221052	INPP5E
24.4526	-4.52848	1.18875	-3.80946	0.000139	0.0221052	AC005229.1
10.6831	-6.1323	1.61245	-3.8031	0.000143	0.0221052	SNORA55
13.1597	5.66965	1.49596	3.78998	0.000151	0.0223598	SYTL3
11.6473	-5.33378	1.40785	-3.78859	0.000152	0.0223598	NRF1
24.4689	6.18451	1.63477	3.78311	0.000155	0.0223606	LINC02010
10.6658	4.94689	1.3138	3.76532	0.000166	0.0223606	SYNJ1
15.7622	4.76372	1.26068	3.77869	0.000158	0.0223606	NAT16
99.1614	4.05943	1.07545	3.77465	0.00016	0.0223606	RHOF
114.139	4.00447	1.06371	3.76461	0.000167	0.0223606	MAFF
21.1394	3.8258	1.01498	3.76934	0.000164	0.0223606	ZBTB7C
9.84873	-4.62634	1.2294	-3.76309	0.000168	0.0223606	LINC02822
5.36453	5.19539	1.39039	3.73664	0.000186	0.0241765	AL035696.1
12.8913	-5.40811	1.44677	-3.73805	0.000185	0.0241765	PRDX2
25.4796	4.12927	1.1095	3.72175	0.000198	0.0249733	TMEM241
10.8779	-3.6176	0.97124	-3.72472	0.000196	0.0249733	APOL6
9.53438	-4.55765	1.22769	-3.71238	0.000205	0.0255792	RETREG3
8.44141	6.36854	1.72017	3.70226	0.000214	0.0256234	CYTIP
14.4436	3.16146	0.852713	3.70752	0.000209	0.0256234	SH3TC2
10.1084	-6.13723	1.65769	-3.70228	0.000214	0.0256234	SNRPG
1990.33	-2.39103	0.646602	-3.69784	0.000217	0.0257523	RNA5SP202
48.2716	5.66831	1.53772	3.68619	0.000228	0.0259971	MGST3
8.36321	-3.17031	0.858752	-3.69176	0.000223	0.0259971	SLC41A1
82.0947	-3.85221	1.04457	-3.68784	0.000226	0.0259971	HJURP
16.9171	-6.7548	1.83659	-3.67791	0.000235	0.0265387	MIR6724-1
23.1732	-5.80191	1.58104	-3.66967	0.00024286	0.0270902	TRIM61
11.984	5.01132	1.37233	3.6517	0.000261	0.0274575	JMJD6
8.55375	4.59337	1.2611	3.64234	0.00027	0.0274575	NEDD1
6.41266	4.35433	1.1965	3.63923	0.000273	0.0274575	B3GNT5
46.0455	3.53208	0.979893	3.60456	0.000313	0.0274575	STXBP6
159.255	3.35353	0.92966	3.60727	0.000309	0.0274575	KIF12
1894.15	-2.28004	0.634787	-3.59181	0.000328	0.0274575	RNA5S16
1894.15	-2.28004	0.634787	-3.59181	0.000328	0.0274575	RNA5S17
1894.34	-2.28021	0.63481	-3.59196	0.000328	0.0274575	RNA5S12
1894.24	-2.28021	0.634795	-3.59205	0.000328	0.0274575	RNA5S3
1894.28	-2.28025	0.634798	-3.59208	0.000328	0.0274575	RNA5S1
1894.28	-2.28025	0.634798	-3.59208	0.000328	0.0274575	RNA5S2
1894.29	-2.28025	0.6348	-3.59208	0.000328	0.0274575	RNA5S4
1894.29	-2.28025	0.6348	-3.59208	0.000328	0.0274575	RNA5S5
1894.29	-2.28025	0.6348	-3.59208	0.000328	0.0274575	RNA5S6
1894.29	-2.28025	0.6348	-3.59208	0.000328	0.0274575	RNA5S7
1894.29	-2.28025	0.6348	-3.59208	0.000328	0.0274575	RNA5S8
1894.29	-2.28025	0.6348	-3.59208	0.000328	0.0274575	RNA5S10
1894.39	-2.28025	0.63481	-3.59203	0.000328	0.0274575	RNA5S13
1894.39	-2.28025	0.63481	-3.59203	0.000328	0.0274575	RNA5S14
1894.39	-2.28025	0.63481	-3.59203	0.000328	0.0274575	RNA5S15
1894.32	-2.28029	0.634803	-3.59212	0.000328	0.0274575	RNA5S11
1850.92	-2.31965	0.63362	-3.66094	0.000251	0.0274575	RNA5SP162
29.292	-3.73535	1.02204	-3.65479	0.000257	0.0274575	MAP3K20
102.575	-3.99418	1.09571	-3.6453	0.000267	0.0274575	TBX18
176.397	-4.57669	1.26426	-3.62006	0.000295	0.0274575	RPS14
6.59267	-4.94209	1.37617	-3.5912	0.000329	0.0274575	SAT1
5.61646	-5.25752	1.44935	-3.6275	0.000286	0.0274575	AFG3L2
27.0293	-6.07277	1.68223	-3.60994	0.000306	0.0274575	MIR4440
15.5	-6.36499	1.76848	-3.59913	0.000319	0.0274575	MIR508
25.3489	4.3899	1.22508	3.58335	0.000339	0.0280529	CASTOR3
11.4004	4.26614	1.19233	3.57799	0.000346	0.0281483	ZNF274
43.0986	3.58535	1.00176	3.57905	0.000345	0.0281483	EVPL
16.8168	3.68323	1.03522	3.55792	0.000374	0.0301341	ERCC6
6.07337	-6.18566	1.74201	-3.55087	0.000384	0.0306946	MIR370
12.9352	6.15101	1.73999	3.53508	0.000408	0.031793	AL603865.1
17.1844	4.65602	1.31696	3.53544	0.000407	0.031793	SEC23IP
2353.12	4.62312	1.3072	3.53665	0.000405	0.031793	AL157414.3
11.331	4.3705	1.24373	3.51401	0.000441	0.0341476	NOS3
5.17789	5.66839	1.61477	3.51034	0.000448	0.0341694	AC078785.3
10.8759	3.92417	1.11865	3.50795	0.000452	0.0341694	AL137847.1
10.6465	-4.5409	1.29463	-3.50749	0.000452	0.0341694	GRWD1
6.69519	-3.03209	0.865192	-3.50453	0.000457	0.0342814	TRAPPC10
7.80034	5.36951	1.53553	3.49685	0.000471	0.0350098	LAGE3
6.40517	5.5583	1.59566	3.48339	0.000495	0.0362567	U73023.1
9.02563	3.47689	0.997893	3.48423	0.000494	0.0362567	SZRD1
120.837	4.27217	1.23036	3.47228	0.000516	0.0375041	CAD
25.4148	3.50458	1.0116	3.46438	0.000531	0.0383322	LINC00410
181.747	3.32822	0.963804	3.45321	0.000554	0.0393641	FEM1B
44.3517	-6.33193	1.8332	-3.45403	0.000552	0.0393641	POU5F1B
5.40885	4.86317	1.41022	3.44851	0.000564	0.0394705	AC055714.1
23.3516	-2.61319	0.757476	-3.44987	0.000561	0.0394705	KCNN3
34.4903	-4.01891	1.16948	-3.43648	0.000589	0.0406713	FXR2
27.3457	-4.13826	1.20361	-3.43822	0.000586	0.0406713	ZBED6CL
137.532	-2.87678	0.839261	-3.42776	0.000609	0.0417012	AQP2
10.3365	5.79667	1.6938	3.42228	0.000621	0.0422491	AC104457.1
16.1414	3.32801	0.974141	3.41635	0.000635	0.0425754	CCDC17
133.385	-3.62102	1.05966	-3.41715	0.000633	0.0425754	AL023653.1
32.7141	6.39818	1.87517	3.41205	0.000645	0.0427768	YBX1P7
13.4789	-4.68992	1.37482	-3.41128	0.000647	0.0427768	SLC26A8
14.2424	4.53782	1.33626	3.3959	0.000684	0.043639	AC231533.1
13.5587	3.75567	1.10673	3.39349	0.00069	0.043639	NUDT22
97.9491	3.72119	1.09472	3.39921	0.000676	0.043639	SYT16
29.4904	-3.74709	1.10371	-3.39501	0.000686	0.043639	PGM5
52.8589	-3.96533	1.16628	-3.39998	0.000674	0.043639	ARHGAP32
15.4033	-5.15102	1.51816	-3.39295	0.000691	0.043639	AK5
4.68263	-5.81276	1.71032	-3.39864	0.000677	0.043639	MIR2116
12.7123	4.18655	1.23583	3.38766	0.000705	0.0438308	SPATA2L
26.256	-3.57741	1.05641	-3.38638	0.000708	0.0438308	SLC44A2
20.1698	-4.15784	1.22746	-3.38735	0.000706	0.0438308	SP1
7.78934	4.9727	1.47198	3.37823	0.00073	0.0448616	AC023105.1
83.4965	-6.5005	1.9261	-3.37496	0.000738	0.0451099	AC005912.1
118.306	-3.5796	1.06197	-3.37073	0.00075	0.0455183	DLK1
5.79292	5.41571	1.61033	3.3631	0.000771	0.0455303	AC005586.2
561.556	3.73535	1.10981	3.36576	0.000763	0.0455303	PLCH2
23.4774	3.60992	1.07372	3.36206	0.000774	0.0455303	MBD1
5.2651	-5.15599	1.53325	-3.3628	0.000772	0.0455303	RPL39
83.1317	-6.49422	1.92865	-3.36724	0.000759	0.0455303	AC099336.2
10.0487	5.32555	1.58776	3.35414	0.000796	0.0462529	RPL3L
4.94985	4.72803	1.4094	3.35464	0.000795	0.0462529	HTR7P1
21.87	-3.63769	1.08501	-3.35267	0.0008	0.0462529	BRD1
13.4013	-4.50457	1.34566	-3.34749	0.000815	0.0468435	AC012313.1
11.8306	-5.31224	1.58986	-3.34132	0.000834	0.0476121	AC098935.1
4.68304	4.72181	1.41606	3.33447	0.000855	0.0478217	BX005266.1
21.5944	4.26994	1.27924	3.33787	0.000844	0.0478217	DHX58
22.4668	-4.24342	1.27294	-3.33356	0.000857	0.0478217	RPS27A
132.864	-5.18428	1.55497	-3.33401	0.000856	0.0478217	PKD2L1
4.35501	-4.53972	1.36536	-3.32493	0.000884	0.049041	CUL5
26.5804	5.08485	1.53321	3.31648	0.000912	0.0494798	CAPG
24.5178	4.83492	1.45654	3.31945	0.000902	0.0494798	WWP1
49.7613	3.83152	1.15522	3.31669	0.000911	0.0494798	XKR5
5.44569	-3.53234	1.06522	-3.31606	0.000913	0.0494798	ROBO2

## Sheet: protein-coding
baseMean	log2FoldChange	lfcSE	stat	pvalue	padj	gene_name
43.1115	6.51507	1.11077	5.86538	4.48e-09	4.3e-05	LRRN2
114.861	7.26996	1.34427	5.40811	6.37e-08	0.000204	ATP6V1B2
54.4631	5.67473	1.11892	5.07163	3.94e-07	0.00086	EML4
22.7315	-7.32827	1.46914	-4.98813	6.1e-07	0.000975	TTC4
50.3083	6.32259	1.32196	4.78275	1.73e-06	0.00207342	PES1
20.7847	6.24488	1.38841	4.49785	6.86e-06	0.00591224	CMTM1
15.2709	4.97464	1.1224	4.43216	9.33e-06	0.0068844	SLC5A11
11.5573	6.40058	1.45739	4.3918	1.12e-05	0.0077028	SP140
13.3935	-4.21332	0.979873	-4.29986	1.71e-05	0.00964415	DOCK11
53.7834	-5.58546	1.31794	-4.23802	2.26e-05	0.0108163	NARS1
74.373	-6.18575	1.45671	-4.24639	2.17e-05	0.0108163	LIPM
15.8027	-6.13198	1.45908	-4.20263	2.64e-05	0.0120521	DYRK2
19.1579	5.61279	1.34436	4.17506	2.98e-05	0.0124372	KIAA2012
23.9226	5.7668	1.40108	4.11598	3.86e-05	0.0130749	MATN3
48.9418	5.29975	1.28912	4.11114	3.94e-05	0.0130749	NELFA
41.0554	4.40592	1.06681	4.12999	3.63e-05	0.0130749	OPRD1
12.2581	-6.78115	1.64982	-4.11023	3.95e-05	0.0130749	ANAPC13
10.0214	-6.89981	1.67376	-4.12235	3.75e-05	0.0130749	RPL23AP57
14.7503	4.76412	1.16238	4.09858	4.16e-05	0.0132924	DNAJA4
25.3596	5.6584	1.38584	4.08301	4.45e-05	0.0133273	PITRM1
50.5545	-5.85974	1.43922	-4.07148	4.67e-05	0.0135802	PLEKHH1
32.5036	-4.87973	1.20789	-4.03988	5.35e-05	0.014658	PALD1
23.8125	-5.84575	1.4534	-4.02212	5.77e-05	0.015369	ANO6
41.5205	5.2284	1.31308	3.98179	6.84e-05	0.0167975	ZW10
22.6678	-4.50063	1.13191	-3.97615	7e-05	0.0167975	KIDINS220
19.7064	-4.95153	1.24472	-3.97804	6.95e-05	0.0167975	JUN
86.1761	4.26164	1.07825	3.95235	7.74e-05	0.0173193	CHCHD7
45.8014	-5.05792	1.28112	-3.94804	7.88e-05	0.0173193	TNFRSF10D
57.9179	-5.209	1.32004	-3.94609	7.94e-05	0.0173193	CLN8
12.0724	-6.05635	1.53312	-3.95034	7.8e-05	0.0173193	H2BC10
4.60247	5.51052	1.40287	3.92805	8.56e-05	0.0182563	MARCHF3
53.551	4.47591	1.1523	3.88432	0.000103	0.0190724	FGD2
20.9898	-3.32146	0.851444	-3.90097	9.58e-05	0.0190724	DMKN
28.3324	-3.54821	0.913344	-3.88485	0.000102	0.0190724	PARD6A
16.8748	-3.99879	1.03048	-3.88049	0.000104	0.0190724	CARM1
13.556	-5.38001	1.37948	-3.90003	9.62e-05	0.0190724	POLR3B
18.5934	-5.62928	1.44502	-3.89564	9.79e-05	0.0190724	EIF3L
12.038	6.45589	1.68373	3.83428	0.000126	0.0214497	CD163L1
10.7047	6.29947	1.64317	3.83373	0.000126	0.0214497	ZNF667
15.5358	5.20928	1.35828	3.83521	0.000125	0.0214497	FOXP2
74.742	-5.29417	1.38181	-3.83133	0.000127	0.0214497	PPP1CA
21.2401	4.10952	1.07603	3.81913	0.000134	0.0221052	PYY
15.0408	3.60942	0.950051	3.79919	0.000145	0.0221052	INPP5E
13.1597	5.66965	1.49596	3.78998	0.000151	0.0223598	SYTL3
11.6473	-5.33378	1.40785	-3.78859	0.000152	0.0223598	NRF1
10.6658	4.94689	1.3138	3.76532	0.000166	0.0223606	SYNJ1
15.7622	4.76372	1.26068	3.77869	0.000158	0.0223606	NAT16
99.1614	4.05943	1.07545	3.77465	0.00016	0.0223606	RHOF
114.139	4.00447	1.06371	3.76461	0.000167	0.0223606	MAFF
21.1394	3.8258	1.01498	3.76934	0.000164	0.0223606	ZBTB7C
12.8913	-5.40811	1.44677	-3.73805	0.000185	0.0241765	PRDX2
25.4796	4.12927	1.1095	3.72175	0.000198	0.0249733	TMEM241
10.8779	-3.6176	0.97124	-3.72472	0.000196	0.0249733	APOL6
9.53438	-4.55765	1.22769	-3.71238	0.000205	0.0255792	RETREG3
8.44141	6.36854	1.72017	3.70226	0.000214	0.0256234	CYTIP
14.4436	3.16146	0.852713	3.70752	0.000209	0.0256234	SH3TC2
10.1084	-6.13723	1.65769	-3.70228	0.000214	0.0256234	SNRPG
48.2716	5.66831	1.53772	3.68619	0.000228	0.0259971	MGST3
8.36321	-3.17031	0.858752	-3.69176	0.000223	0.0259971	SLC41A1
82.0947	-3.85221	1.04457	-3.68784	0.000226	0.0259971	HJURP
23.1732	-5.80191	1.58104	-3.66967	0.00024286	0.0270902	TRIM61
11.984	5.01132	1.37233	3.6517	0.000261	0.0274575	JMJD6
8.55375	4.59337	1.2611	3.64234	0.00027	0.0274575	NEDD1
6.41266	4.35433	1.1965	3.63923	0.000273	0.0274575	B3GNT5
46.0455	3.53208	0.979893	3.60456	0.000313	0.0274575	STXBP6
159.255	3.35353	0.92966	3.60727	0.000309	0.0274575	KIF12
29.292	-3.73535	1.02204	-3.65479	0.000257	0.0274575	MAP3K20
102.575	-3.99418	1.09571	-3.6453	0.000267	0.0274575	TBX18
176.397	-4.57669	1.26426	-3.62006	0.000295	0.0274575	RPS14
6.59267	-4.94209	1.37617	-3.5912	0.000329	0.0274575	SAT1
5.61646	-5.25752	1.44935	-3.6275	0.000286	0.0274575	AFG3L2
25.3489	4.3899	1.22508	3.58335	0.000339	0.0280529	CASTOR3
11.4004	4.26614	1.19233	3.57799	0.000346	0.0281483	ZNF274
43.0986	3.58535	1.00176	3.57905	0.000345	0.0281483	EVPL
16.8168	3.68323	1.03522	3.55792	0.000374	0.0301341	ERCC6
17.1844	4.65602	1.31696	3.53544	0.000407	0.031793	SEC23IP
11.331	4.3705	1.24373	3.51401	0.000441	0.0341476	NOS3
10.6465	-4.5409	1.29463	-3.50749	0.000452	0.0341694	GRWD1
6.69519	-3.03209	0.865192	-3.50453	0.000457	0.0342814	TRAPPC10
7.80034	5.36951	1.53553	3.49685	0.000471	0.0350098	LAGE3
9.02563	3.47689	0.997893	3.48423	0.000494	0.0362567	SZRD1
120.837	4.27217	1.23036	3.47228	0.000516	0.0375041	CAD
181.747	3.32822	0.963804	3.45321	0.000554	0.0393641	FEM1B
44.3517	-6.33193	1.8332	-3.45403	0.000552	0.0393641	POU5F1B
23.3516	-2.61319	0.757476	-3.44987	0.000561	0.0394705	KCNN3
34.4903	-4.01891	1.16948	-3.43648	0.000589	0.0406713	FXR2
27.3457	-4.13826	1.20361	-3.43822	0.000586	0.0406713	ZBED6CL
137.532	-2.87678	0.839261	-3.42776	0.000609	0.0417012	AQP2
16.1414	3.32801	0.974141	3.41635	0.000635	0.0425754	CCDC17
133.385	-3.62102	1.05966	-3.41715	0.000633	0.0425754	AL023653.1
13.4789	-4.68992	1.37482	-3.41128	0.000647	0.0427768	SLC26A8
13.5587	3.75567	1.10673	3.39349	0.00069	0.043639	NUDT22
97.9491	3.72119	1.09472	3.39921	0.000676	0.043639	SYT16
29.4904	-3.74709	1.10371	-3.39501	0.000686	0.043639	PGM5
52.8589	-3.96533	1.16628	-3.39998	0.000674	0.043639	ARHGAP32
15.4033	-5.15102	1.51816	-3.39295	0.000691	0.043639	AK5
12.7123	4.18655	1.23583	3.38766	0.000705	0.0438308	SPATA2L
26.256	-3.57741	1.05641	-3.38638	0.000708	0.0438308	SLC44A2
20.1698	-4.15784	1.22746	-3.38735	0.000706	0.0438308	SP1
118.306	-3.5796	1.06197	-3.37073	0.00075	0.0455183	DLK1
561.556	3.73535	1.10981	3.36576	0.000763	0.0455303	PLCH2
23.4774	3.60992	1.07372	3.36206	0.000774	0.0455303	MBD1
5.2651	-5.15599	1.53325	-3.3628	0.000772	0.0455303	RPL39
10.0487	5.32555	1.58776	3.35414	0.000796	0.0462529	RPL3L
21.87	-3.63769	1.08501	-3.35267	0.0008	0.0462529	BRD1
21.5944	4.26994	1.27924	3.33787	0.000844	0.0478217	DHX58
22.4668	-4.24342	1.27294	-3.33356	0.000857	0.0478217	RPS27A
132.864	-5.18428	1.55497	-3.33401	0.000856	0.0478217	PKD2L1
4.35501	-4.53972	1.36536	-3.32493	0.000884	0.049041	CUL5
26.5804	5.08485	1.53321	3.31648	0.000912	0.0494798	CAPG
24.5178	4.83492	1.45654	3.31945	0.000902	0.0494798	WWP1
49.7613	3.83152	1.15522	3.31669	0.000911	0.0494798	XKR5
5.44569	-3.53234	1.06522	-3.31606	0.000913	0.0494798	ROBO2

## Sheet: non-protein-coding
baseMean	log2FoldChange	lfcSE	stat	pvalue	padj	gene_name
3636.7	-7.10187	1.2486	-5.68787	1.29e-08	6.17e-05	RNY4P17
33.7713	-8.2442	1.63344	-5.04714	4.48e-07	0.00086	AL049872.1
36.4275	-8.75905	1.79347	-4.88385	1.04e-06	0.00142569	PTMAP12
32.0419	5.74941	1.22383	4.69789	2.63e-06	0.00280189	AL591848.2
11.3232	-6.03389	1.34626	-4.48197	7.4e-06	0.00591224	AL592295.1
17.6711	-7.42245	1.64605	-4.50925	6.51e-06	0.00591224	MIR6724-4
25.4426	7.5424	1.73202	4.35469	1.33e-05	0.00852216	AC010223.1
17.4489	-7.15748	1.66048	-4.31049	1.63e-05	0.00964415	MIR6724-3
10.9783	-7.03495	1.64707	-4.27119	1.94e-05	0.010362	AL663070.2
19.3433	-7.84614	1.87939	-4.17484	2.98e-05	0.0124372	MIR4676
14.4187	6.33493	1.52393	4.15696	3.23e-05	0.0128907	AC020915.2
17.183	-6.93797	1.69717	-4.08797	4.35e-05	0.0133273	MIR6724-2
12.5976	-6.30968	1.55393	-4.06047	4.9e-05	0.0138177	AC006509.1
43.7867	5.54661	1.38518	4.00426	6.22e-05	0.01613	RFPL1S
13.596	6.29996	1.62445	3.87822	0.000105	0.0190724	AC013356.4
7.3384	-5.90614	1.52303	-3.87788	0.000105	0.0190724	AC093909.5
9.84732	6.16024	1.62052	3.8014	0.000144	0.0221052	AC093458.2
11.4844	6.01131	1.57915	3.80668	0.000141	0.0221052	LEF1-AS1
24.4526	-4.52848	1.18875	-3.80946	0.000139	0.0221052	AC005229.1
10.6831	-6.1323	1.61245	-3.8031	0.000143	0.0221052	SNORA55
24.4689	6.18451	1.63477	3.78311	0.000155	0.0223606	LINC02010
9.84873	-4.62634	1.2294	-3.76309	0.000168	0.0223606	LINC02822
5.36453	5.19539	1.39039	3.73664	0.000186	0.0241765	AL035696.1
1990.33	-2.39103	0.646602	-3.69784	0.000217	0.0257523	RNA5SP202
16.9171	-6.7548	1.83659	-3.67791	0.000235	0.0265387	MIR6724-1
1894.15	-2.28004	0.634787	-3.59181	0.000328	0.0274575	RNA5S16
1894.15	-2.28004	0.634787	-3.59181	0.000328	0.0274575	RNA5S17
1894.34	-2.28021	0.63481	-3.59196	0.000328	0.0274575	RNA5S12
1894.24	-2.28021	0.634795	-3.59205	0.000328	0.0274575	RNA5S3
1894.28	-2.28025	0.634798	-3.59208	0.000328	0.0274575	RNA5S1
1894.28	-2.28025	0.634798	-3.59208	0.000328	0.0274575	RNA5S2
1894.29	-2.28025	0.6348	-3.59208	0.000328	0.0274575	RNA5S4
1894.29	-2.28025	0.6348	-3.59208	0.000328	0.0274575	RNA5S5
1894.29	-2.28025	0.6348	-3.59208	0.000328	0.0274575	RNA5S6
1894.29	-2.28025	0.6348	-3.59208	0.000328	0.0274575	RNA5S7
1894.29	-2.28025	0.6348	-3.59208	0.000328	0.0274575	RNA5S8
1894.29	-2.28025	0.6348	-3.59208	0.000328	0.0274575	RNA5S10
1894.39	-2.28025	0.63481	-3.59203	0.000328	0.0274575	RNA5S13
1894.39	-2.28025	0.63481	-3.59203	0.000328	0.0274575	RNA5S14
1894.39	-2.28025	0.63481	-3.59203	0.000328	0.0274575	RNA5S15
1894.32	-2.28029	0.634803	-3.59212	0.000328	0.0274575	RNA5S11
1850.92	-2.31965	0.63362	-3.66094	0.000251	0.0274575	RNA5SP162
27.0293	-6.07277	1.68223	-3.60994	0.000306	0.0274575	MIR4440
15.5	-6.36499	1.76848	-3.59913	0.000319	0.0274575	MIR508
6.07337	-6.18566	1.74201	-3.55087	0.000384	0.0306946	MIR370
2353.12	4.62312	1.3072	3.53665	0.000405	0.031793	AL157414.3
12.9352	6.15101	1.73999	3.53508	0.000408	0.031793	AL603865.1
5.17789	5.66839	1.61477	3.51034	0.000448	0.0341694	AC078785.3
10.8759	3.92417	1.11865	3.50795	0.000452	0.0341694	AL137847.1
6.40517	5.5583	1.59566	3.48339	0.000495	0.0362567	U73023.1
25.4148	3.50458	1.0116	3.46438	0.000531	0.0383322	LINC00410
5.40885	4.86317	1.41022	3.44851	0.000564	0.0394705	AC055714.1
10.3365	5.79667	1.6938	3.42228	0.000621	0.0422491	AC104457.1
32.7141	6.39818	1.87517	3.41205	0.000645	0.0427768	YBX1P7
14.2424	4.53782	1.33626	3.3959	0.000684	0.043639	AC231533.1
4.68263	-5.81276	1.71032	-3.39864	0.000677	0.043639	MIR2116
7.78934	4.9727	1.47198	3.37823	0.00073	0.0448616	AC023105.1
83.4965	-6.5005	1.9261	-3.37496	0.000738	0.0451099	AC005912.1
5.79292	5.41571	1.61033	3.3631	0.000771	0.0455303	AC005586.2
83.1317	-6.49422	1.92865	-3.36724	0.000759	0.0455303	AC099336.2
4.94985	4.72803	1.4094	3.35464	0.000795	0.0462529	HTR7P1
13.4013	-4.50457	1.34566	-3.34749	0.000815	0.0468435	AC012313.1
11.8306	-5.31224	1.58986	-3.34132	0.000834	0.0476121	AC098935.1
4.68304	4.72181	1.41606	3.33447	0.000855	0.0478217	BX005266.1
