# Supplementary material for: Extracellular Vesicle Profiling Reveals Novel Autism Signatures in Patient-Derived Forebrain Organoids
Source: Research Square preprint supplement (doi:10.21203/rs.3.rs-6573757/v1), 2025-05-12
Supplement: Supplementary file 6 [file d21aa5b9b94b4d4476e91ea1.xlsx]

## Sheet: Sheet1
baseMean	log2FoldChange	lfcSE	stat	pvalue	padj	gene_symbol	gene_id	biotype
19.3433	-7.84614	1.87939	-4.17484	2.98e-05	0.0124372	MIR4676	ENSG00000266719	miRNA
17.6711	-7.42245	1.64605	-4.50925	6.51e-06	0.00591224	MIR6724-4	ENSG00000275692	miRNA
17.4489	-7.15748	1.66048	-4.31049	1.63e-05	0.00964415	MIR6724-3	ENSG00000277379	miRNA
17.183	-6.93797	1.69717	-4.08797	4.35e-05	0.0133273	MIR6724-2	ENSG00000274060	miRNA
16.9171	-6.7548	1.83659	-3.67791	0.000235	0.0265387	MIR6724-1	ENSG00000275950	miRNA
15.5	-6.36499	1.76848	-3.59913	0.000319	0.0274575	MIR508	ENSG00000207589	miRNA
6.07337	-6.18566	1.74201	-3.55087	0.000384	0.0306946	MIR370	ENSG00000199005	miRNA
27.0293	-6.07277	1.68223	-3.60994	0.000306	0.0274575	MIR4440	ENSG00000266109	miRNA
4.68263	-5.81276	1.71032	-3.39864	0.000677	0.043639	MIR2116	ENSG00000253030	miRNA
18.6683	-5.4953	1.77069	-3.10349	0.00191256	0.0733037	MIR548Q	ENSG00000221331	miRNA
4.26436	-4.23681	1.65858	-2.55448	0.0106348	0.164814	MIR4677	ENSG00000265201	miRNA
3.2022	-4.06041	1.82352	-2.22668	0.0259685	NA	MIR6877	ENSG00000273932	miRNA
123.954	-3.31363	1.66205	-1.9937	0.0461852	0.326857	MIR188	ENSG00000207768	miRNA
3.88249	-3.02766	1.23759	-2.44642	0.0144281	0.186953	MIR4443	ENSG00000265483	miRNA
55.6637	-2.97232	1.41283	-2.1038	0.0353955	0.287024	MIR323B	ENSG00000208004	miRNA
102.092	-2.93776	0.948184	-3.0983	0.00194631	0.0733037	MIR4286	ENSG00000263762	miRNA
26.9981	-2.58394	1.29424	-1.9965	0.0458798	0.325777	MIR409	ENSG00000199107	miRNA
15.7617	-2.46491	0.964091	-2.55672	0.0105665	0.164553	MIR5699	ENSG00000263511	miRNA
25.3505	2.48991	1.12089	2.22137	0.0263261	0.250046	MIR3180-1	ENSG00000258354	miRNA
25.3505	2.48991	1.12089	2.22137	0.0263261	0.250046	MIR3180-2	ENSG00000257366	miRNA
25.3505	2.48991	1.12089	2.22137	0.0263261	0.250046	MIR3180-3	ENSG00000257563	miRNA
25.3147	2.50539	1.12048	2.23601	0.0253513	0.245444	MIR3180-5	ENSG00000264397	miRNA
25.3729	2.50922	1.11968	2.24102	0.0250246	0.244461	MIR3180-4	ENSG00000257391	miRNA
25.8004	3.10828	1.55082	2.00429	0.0450392	0.322434	MIR1468	ENSG00000222532	miRNA
49.0692	3.35471	1.57017	2.13653	0.0326358	0.277549	MIR891A	ENSG00000216056	miRNA
54.4742	3.39041	1.44673	2.3435	0.0191039	0.211244	MIR489	ENSG00000207656	miRNA
24.5585	3.68462	1.49758	2.46039	0.0138788	0.185172	MIR3943	ENSG00000264069	miRNA
8.09292	3.78075	1.68587	2.24262	0.0249216	0.243952	MIR5587	ENSG00000266124	miRNA
3.20573	4.04422	1.96623	2.05684	0.0397014	NA	MIR1269B	ENSG00000265503	miRNA
5.00686	4.52706	1.81916	2.48855	0.0128266	0.177554	MIR548J	ENSG00000221760	miRNA
90.3093	7.69831	2.83594	2.71456	0.00663646	0.130458	MIR1263	ENSG00000221251	miRNA
